# Supplementary material
Source: publisher site journal article supplement (https://www.spandidos-publications.com/5386/downloadSupplementary)
Supplement: Supplementary file 1 [file downloadSupplementary]

## Sheet: Sup Table Ⅰ
Table SI. KEGG analysis of target mRNAs of MM-involved differentially expressed lncRNAs
Pathway ID	Description	GeneRatio	BgRatio	P-value	q-value	Count	Genes	enrich_factor
hsa00920	Sulfur metabolism	2/242	10/6914	1.125e-02	3.000e-01	2	ENSG00000139531 ENSG00000105755	5.71
hsa00532	Glycosaminoglycan biosynthesis - chondroitin sulfate / dermatan sulfate	3/242	20/6914	1.186e-02	2.846e-01	3	ENSG00000122863 ENSG00000149541 ENSG00000123989	4.29
hsa05322	Systemic lupus erythematosus	17/242	134/6914	6.741e-06	1.618e-03	17	ENSG00000272196 ENSG00000197409 ENSG00000124635 ENSG00000274641 ENSG00000181218 ENSG00000132475 ENSG00000125835 ENSG00000203811 ENSG00000278828 ENSG00000278677 ENSG00000196890 ENSG00000278463 ENSG00000277075 ENSG00000158373 ENSG00000203814 ENSG00000270276 ENSG00000203812	3.62
hsa04110	Cell cycle	15/242	124/6914	3.571e-05	2.857e-03	15	ENSG00000133740 ENSG00000157456 ENSG00000123080 ENSG00000134057 ENSG00000145386 ENSG00000158402 ENSG00000117399 ENSG00000156970 ENSG00000164109 ENSG00000169679 ENSG00000170312 ENSG00000105810 ENSG00000134308 ENSG00000164611 ENSG00000112576	3.46
hsa04114	Oocyte meiosis	14/242	121/6914	9.826e-05	5.896e-03	14	ENSG00000157456 ENSG00000134057 ENSG00000121281 ENSG00000158402 ENSG00000117399 ENSG00000164109 ENSG00000169679 ENSG00000087586 ENSG00000129810 ENSG00000170312 ENSG00000134308 ENSG00000100030 ENSG00000164611 ENSG00000156509	3.31
hsa04115	p53 signaling pathway	8/242	69/6914	2.001e-03	9.605e-02	8	ENSG00000157456 ENSG00000134057 ENSG00000134574 ENSG00000170312 ENSG00000105810 ENSG00000075218 ENSG00000177595 ENSG00000112576	3.31
hsa05034	Alcoholism	20/242	179/6914	9.001e-06	1.080e-03	20	ENSG00000272196 ENSG00000197409 ENSG00000124635 ENSG00000274641 ENSG00000181218 ENSG00000167083 ENSG00000118260 ENSG00000132475 ENSG00000203811 ENSG00000278828 ENSG00000278677 ENSG00000196890 ENSG00000278463 ENSG00000148082 ENSG00000277075 ENSG00000158373 ENSG00000203814 ENSG00000100030 ENSG00000270276 ENSG00000203812	3.19
hsa04330	Notch signaling pathway	5/242	48/6914	1.593e-02	3.186e-01	5	ENSG00000107404 ENSG00000133961 ENSG00000138433 ENSG00000106003 ENSG00000184916	2.98
hsa05219	Bladder cancer	4/242	41/6914	3.251e-02	5.202e-01	4	ENSG00000113070 ENSG00000197122 ENSG00000068028 ENSG00000100030	2.79
hsa00512	Mucin type O-Glycan biosynthesis	3/242	31/6914	5.057e-02	7.139e-01	3	ENSG00000131386 ENSG00000158470 ENSG00000100626	2.76
hsa00514	Other types of O-glycan biosynthesis	3/242	31/6914	5.057e-02	7.139e-01	3	ENSG00000167889 ENSG00000117411 ENSG00000106003	2.76
hsa00410	beta-Alanine metabolism	3/242	31/6914	5.057e-02	7.139e-01	3	ENSG00000127884 ENSG00000088826 ENSG00000133313	2.76
hsa00480	Glutathione metabolism	5/242	52/6914	2.288e-02	4.224e-01	5	ENSG00000008394 ENSG00000167325 ENSG00000023909 ENSG00000182054 ENSG00000134202	2.75
hsa04914	Progesterone-mediated oocyte maturation	9/242	96/6914	5.559e-03	2.224e-01	9	ENSG00000157456 ENSG00000134057 ENSG00000121281 ENSG00000145386 ENSG00000158402 ENSG00000164109 ENSG00000169679 ENSG00000170312 ENSG00000100030	2.68
hsa05143	African trypanosomiasis	3/242	34/6914	6.743e-02	7.036e-01	3	ENSG00000149782 ENSG00000172936 ENSG00000112769	2.52
hsa00600	Sphingolipid metabolism	4/242	47/6914	5.426e-02	6.201e-01	4	ENSG00000148154 ENSG00000100422 ENSG00000141934 ENSG00000223802	2.43
hsa00534	Glycosaminoglycan biosynthesis - heparan sulfate / heparin	2/242	24/6914	1.084e-01	8.392e-01	2	ENSG00000012232 ENSG00000149541	2.38
hsa00190	Oxidative phosphorylation	11/242	133/6914	7.173e-03	2.459e-01	11	ENSG00000189043 ENSG00000198727 ENSG00000213760 ENSG00000131100 ENSG00000198840 ENSG00000010256 ENSG00000212907 ENSG00000110955 ENSG00000204370 ENSG00000228253 ENSG00000198763	2.36
hsa00330	Arginine and proline metabolism	4/242	50/6914	6.791e-02	6.519e-01	4	ENSG00000183010 ENSG00000166165 ENSG00000088826 ENSG00000133313	2.29
hsa00563	Glycosylphosphatidylinositol(GPI)-anchor biosynthesis	2/242	25/6914	1.194e-01	8.955e-01	2	ENSG00000197858 ENSG00000069943	2.29
hsa05161	Hepatitis B	11/242	146/6914	1.446e-02	3.155e-01	11	ENSG00000145386 ENSG00000197122 ENSG00000118260 ENSG00000134574 ENSG00000089685 ENSG00000105810 ENSG00000134308 ENSG00000127666 ENSG00000100030 ENSG00000147873 ENSG00000172936	2.15
hsa04966	Collecting duct acid secretion	2/242	27/6914	1.430e-01	9.806e-01	2	ENSG00000213760 ENSG00000131100	2.12
hsa05120	Epithelial cell signaling in Helicobacter pylori infection	5/242	68/6914	7.166e-02	6.615e-01	5	ENSG00000113070 ENSG00000197122 ENSG00000213760 ENSG00000131100 ENSG00000108262	2.10
hsa05203	Viral carcinogenesis	15/242	205/6914	7.334e-03	2.200e-01	15	ENSG00000124635 ENSG00000145386 ENSG00000274641 ENSG00000197122 ENSG00000117399 ENSG00000118260 ENSG00000170312 ENSG00000105810 ENSG00000196890 ENSG00000158373 ENSG00000203814 ENSG00000134308 ENSG00000100030 ENSG00000270276 ENSG00000112576	2.09
hsa00630	Glyoxylate and dicarboxylate metabolism	2/242	28/6914	1.555e-01	1	2	ENSG00000114054 ENSG00000184207	2.04
hsa04915	Estrogen signaling pathway	7/242	99/6914	5.381e-02	6.457e-01	7	ENSG00000113070 ENSG00000121281 ENSG00000197122 ENSG00000118260 ENSG00000148082 ENSG00000100030 ENSG00000149782	2.02
hsa04911	Insulin secretion	6/242	85/6914	6.760e-02	6.760e-01	6	ENSG00000104783 ENSG00000121281 ENSG00000143603 ENSG00000118260 ENSG00000143153 ENSG00000149782	2.02
hsa05012	Parkinson,s disease	10/242	142/6914	2.892e-02	4.958e-01	10	ENSG00000189043 ENSG00000198727 ENSG00000141404 ENSG00000198840 ENSG00000010256 ENSG00000212907 ENSG00000110955 ENSG00000204370 ENSG00000228253 ENSG00000198763	2.01
hsa04916	Melanogenesis	7/242	100/6914	5.658e-02	6.172e-01	7	ENSG00000107404 ENSG00000121281 ENSG00000118260 ENSG00000187098 ENSG00000100030 ENSG00000149782 ENSG00000188763	2.00
hsa03440	Homologous recombination	2/242	29/6914	1.685e-01	1	2	ENSG00000172732 ENSG00000139618	1.97
hsa05216	Thyroid cancer	2/242	29/6914	1.685e-01	1	2	ENSG00000165731 ENSG00000100030	1.97
hsa04540	Gap junction	6/242	88/6914	7.885e-02	6.759e-01	6	ENSG00000167553 ENSG00000121281 ENSG00000197122 ENSG00000170312 ENSG00000100030 ENSG00000149782	1.95
hsa00240	Pyrimidine metabolism	7/242	105/6914	7.190e-02	6.391e-01	7	ENSG00000167900 ENSG00000129187 ENSG00000205309 ENSG00000167325 ENSG00000125877 ENSG00000179958 ENSG00000177084	1.90
hsa00020	Citrate cycle (TCA cycle)	2/242	30/6914	1.819e-01	1	2	ENSG00000182054 ENSG00000204370	1.90
hsa04390	Hippo signaling pathway	10/242	154/6914	4.840e-02	7.260e-01	10	ENSG00000107404 ENSG00000131899 ENSG00000125968 ENSG00000089685 ENSG00000068028 ENSG00000134308 ENSG00000104899 ENSG00000067606 ENSG00000188763 ENSG00000112576	1.86
hsa00983	Drug metabolism - other enzymes	3/242	46/6914	1.636e-01	1	3	ENSG00000167900 ENSG00000125877 ENSG00000178035	1.86
hsa04710	Circadian rhythm	2/242	31/6914	1.958e-01	1	2	ENSG00000134107 ENSG00000118260	1.84
hsa04260	Cardiac muscle contraction	5/242	78/6914	1.223e-01	8.895e-01	5	ENSG00000198727 ENSG00000143153 ENSG00000010256 ENSG00000167460 ENSG00000167535	1.83
hsa00640	Propanoate metabolism	2/242	32/6914	2.100e-01	1	2	ENSG00000114054 ENSG00000127884	1.79
hsa05144	Malaria	3/242	49/6914	1.944e-01	1	3	ENSG00000115884 ENSG00000110651 ENSG00000172936	1.75
hsa00510	N-Glycan biosynthesis	3/242	49/6914	1.944e-01	1	3	ENSG00000115275 ENSG00000167889 ENSG00000117411	1.75
hsa03410	Base excision repair	2/242	33/6914	2.247e-01	1	2	ENSG00000177084 ENSG00000109674	1.73
hsa05230	Central carbon metabolism in cancer	4/242	67/6914	1.825e-01	1	4	ENSG00000077463 ENSG00000171314 ENSG00000165731 ENSG00000100030	1.71
hsa03010	Ribosome	8/242	134/6914	1.050e-01	8.400e-01	8	ENSG00000140988 ENSG00000142676 ENSG00000159111 ENSG00000130312 ENSG00000188846 ENSG00000162244 ENSG00000243927 ENSG00000115268	1.71
hsa04350	TGF-beta signaling pathway	5/242	84/6914	1.608e-01	1	5	ENSG00000133740 ENSG00000158747 ENSG00000125968 ENSG00000100030 ENSG00000104899	1.70
hsa00310	Lysine degradation	3/242	52/6914	2.278e-01	1	3	ENSG00000127884 ENSG00000083444 ENSG00000101945	1.65
hsa03460	Fanconi anemia pathway	3/242	53/6914	2.394e-01	1	3	ENSG00000131944 ENSG00000172732 ENSG00000139618	1.62
hsa04918	Thyroid hormone synthesis	4/242	71/6914	2.185e-01	1	4	ENSG00000121281 ENSG00000118260 ENSG00000143153 ENSG00000149782	1.61
hsa04931	Insulin resistance	6/242	109/6914	1.908e-01	1	6	ENSG00000101255 ENSG00000119938 ENSG00000118260 ENSG00000072310 ENSG00000108788 ENSG00000067606	1.57
hsa04912	GnRH signaling pathway	5/242	91/6914	2.131e-01	1	5	ENSG00000113070 ENSG00000121281 ENSG00000197122 ENSG00000100030 ENSG00000149782	1.57
hsa05220	Chronic myeloid leukemia	4/242	73/6914	2.376e-01	1	4	ENSG00000159216 ENSG00000105810 ENSG00000148082 ENSG00000100030	1.57
hsa05217	Basal cell carcinoma	3/242	55/6914	2.635e-01	1	3	ENSG00000107404 ENSG00000107882 ENSG00000188763	1.56
hsa05166	HTLV-I infection	14/242	258/6914	9.354e-02	7.741e-01	14	ENSG00000107404 ENSG00000157456 ENSG00000123080 ENSG00000121281 ENSG00000164362 ENSG00000117399 ENSG00000156970 ENSG00000164109 ENSG00000118260 ENSG00000100300 ENSG00000177084 ENSG00000164611 ENSG00000188763 ENSG00000112576	1.55
hsa05223	Non-small cell lung cancer	3/242	56/6914	2.758e-01	1	3	ENSG00000105810 ENSG00000068028 ENSG00000100030	1.53
hsa01200	Carbon metabolism	6/242	113/6914	2.188e-01	1	6	ENSG00000114054 ENSG00000171314 ENSG00000182054 ENSG00000127884 ENSG00000204370 ENSG00000184207	1.52
hsa04724	Glutamatergic synapse	6/242	113/6914	2.188e-01	1	6	ENSG00000173020 ENSG00000121281 ENSG00000167083 ENSG00000051128 ENSG00000100030 ENSG00000149782	1.52
hsa04713	Circadian entrainment	5/242	95/6914	2.465e-01	1	5	ENSG00000121281 ENSG00000167083 ENSG00000118260 ENSG00000100030 ENSG00000149782	1.50
hsa00564	Glycerophospholipid metabolism	5/242	95/6914	2.465e-01	1	5	ENSG00000141934 ENSG00000153395 ENSG00000103502 ENSG00000145214 ENSG00000169692	1.50
hsa04960	Aldosterone-regulated sodium reabsorption	2/242	39/6914	3.198e-01	1	2	ENSG00000143153 ENSG00000100030	1.47
hsa04070	Phosphatidylinositol signaling system	5/242	98/6914	2.730e-01	1	5	ENSG00000176095 ENSG00000161714 ENSG00000103502 ENSG00000145214 ENSG00000149782	1.46
hsa00561	Glycerolipid metabolism	3/242	59/6914	3.143e-01	1	3	ENSG00000141934 ENSG00000145214 ENSG00000169692	1.45
hsa04150	mTOR signaling pathway	3/242	60/6914	3.275e-01	1	3	ENSG00000063046 ENSG00000100030 ENSG00000168209	1.43
hsa04071	Sphingolipid signaling pathway	6/242	120/6914	2.726e-01	1	6	ENSG00000116329 ENSG00000267534 ENSG00000223802 ENSG00000100030 ENSG00000149782 ENSG00000067606	1.43
hsa00380	Tryptophan metabolism	2/242	40/6914	3.367e-01	1	2	ENSG00000127884 ENSG00000171097	1.43
hsa04925	Aldosterone synthesis and secretion	4/242	81/6914	3.215e-01	1	4	ENSG00000121281 ENSG00000118260 ENSG00000105287 ENSG00000149782	1.41
hsa04933	AGE-RAGE signaling pathway in diabetic complications	5/242	101/6914	3.009e-01	1	5	ENSG00000161714 ENSG00000178726 ENSG00000100030 ENSG00000149782 ENSG00000067606	1.41
hsa04611	Platelet activation	6/242	122/6914	2.891e-01	1	6	ENSG00000121281 ENSG00000197122 ENSG00000077420 ENSG00000100030 ENSG00000149782 ENSG00000067606	1.41
hsa04072	Phospholipase D signaling pathway	7/242	143/6914	2.764e-01	1	7	ENSG00000141934 ENSG00000121281 ENSG00000148082 ENSG00000100030 ENSG00000145214 ENSG00000149782 ENSG00000169692	1.40
hsa04975	Fat digestion and absorption	2/242	41/6914	3.538e-01	1	2	ENSG00000141934 ENSG00000169692	1.39
hsa04062	Chemokine signaling pathway	9/242	186/6914	2.573e-01	1	9	ENSG00000173020 ENSG00000121281 ENSG00000167083 ENSG00000197122 ENSG00000148082 ENSG00000134215 ENSG00000100030 ENSG00000149782 ENSG00000067606	1.38
hsa05142	Chagas disease (American trypanosomiasis)	5/242	104/6914	3.299e-01	1	5	ENSG00000141404 ENSG00000127666 ENSG00000100030 ENSG00000149782 ENSG00000172936	1.37
hsa05010	Alzheimer,s disease	8/242	168/6914	2.911e-01	1	8	ENSG00000189043 ENSG00000198727 ENSG00000010256 ENSG00000110955 ENSG00000100030 ENSG00000149782 ENSG00000204370 ENSG00000228253	1.36
hsa00860	Porphyrin and chlorophyll metabolism	2/242	42/6914	3.712e-01	1	2	ENSG00000143224 ENSG00000165060	1.36
hsa04015	Rap1 signaling pathway	10/242	211/6914	2.677e-01	1	10	ENSG00000213445 ENSG00000121281 ENSG00000125968 ENSG00000197122 ENSG00000077420 ENSG00000105287 ENSG00000100030 ENSG00000149782 ENSG00000067606 ENSG00000169220	1.35
hsa04261	Adrenergic signaling in cardiomyocytes	7/242	148/6914	3.148e-01	1	7	ENSG00000121281 ENSG00000118260 ENSG00000143153 ENSG00000100030 ENSG00000149782 ENSG00000167460 ENSG00000167535	1.35
hsa05016	Huntington,s disease	9/242	193/6914	3.022e-01	1	9	ENSG00000189043 ENSG00000198727 ENSG00000118260 ENSG00000198959 ENSG00000010256 ENSG00000110955 ENSG00000149782 ENSG00000204370 ENSG00000228253	1.33
hsa05214	Glioma	3/242	65/6914	3.964e-01	1	3	ENSG00000105810 ENSG00000148082 ENSG00000100030	1.32
hsa04012	ErbB signaling pathway	4/242	87/6914	3.911e-01	1	4	ENSG00000113070 ENSG00000197122 ENSG00000148082 ENSG00000100030	1.31
hsa00230	Purine metabolism	8/242	175/6914	3.424e-01	1	8	ENSG00000054179 ENSG00000198931 ENSG00000121281 ENSG00000205309 ENSG00000167325 ENSG00000125877 ENSG00000178035 ENSG00000177084	1.31
hsa05212	Pancreatic cancer	3/242	66/6914	4.106e-01	1	3	ENSG00000139618 ENSG00000105810 ENSG00000100030	1.30
hsa04725	Cholinergic synapse	5/242	111/6914	4.019e-01	1	5	ENSG00000121281 ENSG00000167083 ENSG00000118260 ENSG00000100030 ENSG00000149782	1.29
hsa05202	Transcriptional misregulation in cancer	8/242	179/6914	3.734e-01	1	8	ENSG00000123080 ENSG00000197409 ENSG00000159216 ENSG00000132475 ENSG00000203811 ENSG00000278828 ENSG00000176046 ENSG00000268447	1.28
hsa04970	Salivary secretion	4/242	89/6914	4.153e-01	1	4	ENSG00000104783 ENSG00000121281 ENSG00000143153 ENSG00000149782	1.28
hsa05414	Dilated cardiomyopathy	4/242	89/6914	4.153e-01	1	4	ENSG00000121281 ENSG00000160789 ENSG00000167460 ENSG00000167535	1.28
hsa00270	Cysteine and methionine metabolism	2/242	45/6914	4.245e-01	1	2	ENSG00000158467 ENSG00000023909	1.27
hsa00565	Ether lipid metabolism	2/242	45/6914	4.245e-01	1	2	ENSG00000141934 ENSG00000153395	1.27
hsa01100	Metabolic pathways	54/242	1238/6914	1.343e-01	9.480e-01	54	ENSG00000183010 ENSG00000148154 ENSG00000167900 ENSG00000129187 ENSG00000131386 ENSG00000115275 ENSG00000198931 ENSG00000141934 ENSG00000143224 ENSG00000189043 ENSG00000205309 ENSG00000153395 ENSG00000114054 ENSG00000161714 ENSG00000171314 ENSG00000012232 ENSG00000158467 ENSG00000198727 ENSG00000197858 ENSG00000167325 ENSG00000023909 ENSG00000069943 ENSG00000101638 ENSG00000182054 ENSG00000125877…	1.25
hsa03420	Nucleotide excision repair	2/242	46/6914	4.426e-01	1	2	ENSG00000134574 ENSG00000177084	1.24
hsa04210	Apoptosis	6/242	140/6914	4.556e-01	1	6	ENSG00000167553 ENSG00000089685 ENSG00000160789 ENSG00000100030 ENSG00000177595 ENSG00000167136	1.22
hsa04622	RIG-I-like receptor signaling pathway	3/242	70/6914	4.691e-01	1	3	ENSG00000136560 ENSG00000147873 ENSG00000184995	1.22
hsa04961	Endocrine and other factor-regulated calcium reabsorption	2/242	47/6914	4.609e-01	1	2	ENSG00000143153 ENSG00000149782	1.22
hsa05218	Melanoma	3/242	71/6914	4.840e-01	1	3	ENSG00000105810 ENSG00000187098 ENSG00000100030	1.21
hsa04919	Thyroid hormone signaling pathway	5/242	118/6914	4.789e-01	1	5	ENSG00000197122 ENSG00000161714 ENSG00000143153 ENSG00000100030 ENSG00000149782	1.21
hsa00562	Inositol phosphate metabolism	3/242	71/6914	4.840e-01	1	3	ENSG00000161714 ENSG00000103502 ENSG00000149782	1.21
hsa04917	Prolactin signaling pathway	3/242	72/6914	4.990e-01	1	3	ENSG00000197122 ENSG00000148082 ENSG00000100030	1.19
hsa00280	Valine, leucine and isoleucine degradation	2/242	48/6914	4.793e-01	1	2	ENSG00000114054 ENSG00000127884	1.19
hsa04662	B cell receptor signaling pathway	3/242	72/6914	4.990e-01	1	3	ENSG00000134215 ENSG00000100030 ENSG00000110651	1.19
hsa04930	Type II diabetes mellitus	2/242	48/6914	4.793e-01	1	2	ENSG00000100030 ENSG00000067606	1.19
hsa04750	Inflammatory mediator regulation of TRP channels	4/242	98/6914	5.296e-01	1	4	ENSG00000121281 ENSG00000197122 ENSG00000167723 ENSG00000149782	1.17
hsa04971	Gastric acid secretion	3/242	74/6914	5.293e-01	1	3	ENSG00000121281 ENSG00000143153 ENSG00000149782	1.16
hsa01230	Biosynthesis of amino acids	3/242	74/6914	5.293e-01	1	3	ENSG00000183010 ENSG00000171314 ENSG00000182054	1.16
hsa05200	Pathways in cancer	16/242	397/6914	4.897e-01	1	16	ENSG00000107404 ENSG00000121281 ENSG00000159216 ENSG00000167083 ENSG00000089685 ENSG00000139618 ENSG00000165731 ENSG00000123975 ENSG00000105810 ENSG00000068028 ENSG00000107882 ENSG00000187098 ENSG00000100030 ENSG00000149782 ENSG00000188763 ENSG00000112769	1.15
hsa04913	Ovarian steroidogenesis	2/242	50/6914	5.164e-01	1	2	ENSG00000121281 ENSG00000196139	1.14
hsa05133	Pertussis	3/242	75/6914	5.445e-01	1	3	ENSG00000127666 ENSG00000100030 ENSG00000172936	1.14
hsa04932	Non-alcoholic fatty liver disease (NAFLD)	6/242	151/6914	5.702e-01	1	6	ENSG00000189043 ENSG00000198727 ENSG00000072310 ENSG00000010256 ENSG00000204370 ENSG00000108788	1.14
hsa05110	Vibrio cholerae infection	2/242	50/6914	5.164e-01	1	2	ENSG00000213760 ENSG00000131100	1.14
hsa04723	Retrograde endocannabinoid signaling	4/242	101/6914	5.692e-01	1	4	ENSG00000121281 ENSG00000167083 ENSG00000100030 ENSG00000149782	1.13
hsa04922	Glucagon signaling pathway	4/242	101/6914	5.692e-01	1	4	ENSG00000142178 ENSG00000171314 ENSG00000118260 ENSG00000149782	1.13
hsa04620	Toll-like receptor signaling pathway	4/242	106/6914	6.362e-01	1	4	ENSG00000127666 ENSG00000100030 ENSG00000147873 ENSG00000172936	1.08
hsa05160	Hepatitis C	5/242	133/6914	6.553e-01	1	5	ENSG00000127666 ENSG00000100030 ENSG00000147873 ENSG00000110651 ENSG00000113946	1.07
hsa04512	ECM-receptor interaction	3/242	82/6914	6.530e-01	1	3	ENSG00000115884 ENSG00000072571 ENSG00000112769	1.05
hsa03008	Ribosome biogenesis in eukaryotes	3/242	82/6914	6.530e-01	1	3	ENSG00000005189 ENSG00000241945 ENSG00000177971	1.05
hsa05204	Chemical carcinogenesis	3/242	82/6914	6.530e-01	1	3	ENSG00000008394 ENSG00000134202 ENSG00000171097	1.05
hsa05130	Pathogenic Escherichia coli infection	2/242	55/6914	6.105e-01	1	2	ENSG00000167553 ENSG00000134308	1.04
hsa04910	Insulin signaling pathway	5/242	139/6914	7.282e-01	1	5	ENSG00000119938 ENSG00000148082 ENSG00000072310 ENSG00000100030 ENSG00000067606	1.03
hsa04146	Peroxisome	3/242	83/6914	6.686e-01	1	3	ENSG00000104883 ENSG00000162735 ENSG00000182054	1.03
hsa04022	cGMP-PKG signaling pathway	6/242	167/6914	7.459e-01	1	6	ENSG00000121281 ENSG00000116329 ENSG00000118260 ENSG00000143153 ENSG00000100030 ENSG00000149782	1.03
hsa05410	Hypertrophic cardiomyopathy (HCM)	3/242	83/6914	6.686e-01	1	3	ENSG00000160789 ENSG00000167460 ENSG00000167535	1.03
hsa00670	One carbon pool by folate	1/242	20/6914	1	1	1	ENSG00000144908	1.00
hsa00340	Histidine metabolism	1/242	24/6914	1	1	1	ENSG00000133313	1.00
hsa05221	Acute myeloid leukemia	2/242	57/6914	6.484e-01	1	2	ENSG00000159216 ENSG00000100030	1.00
hsa00360	Phenylalanine metabolism	1/242	17/6914	1	1	1	ENSG00000240972	1.00
hsa04140	Regulation of autophagy	1/242	39/6914	1	1	1	ENSG00000147873	1.00
hsa04964	Proximal tubule bicarbonate reclamation	1/242	23/6914	1	1	1	ENSG00000143153	1.00
hsa05031	Amphetamine addiction	1/242	67/6914	1	1	1	ENSG00000118260	1.00
hsa00900	Terpenoid backbone biosynthesis	1/242	22/6914	1	1	1	ENSG00000173653	1.00
hsa04340	Hedgehog signaling pathway	1/242	51/6914	1	1	1	ENSG00000107882	1.00
hsa05132	Salmonella infection	3/242	86/6914	1	1	3	ENSG00000128591 ENSG00000100030 ENSG00000172936	1.00
hsa04973	Carbohydrate digestion and absorption	1/242	45/6914	1	1	1	ENSG00000143153	1.00
hsa04978	Mineral absorption	1/242	51/6914	1	1	1	ENSG00000143153	1.00
hsa05320	Autoimmune thyroid disease	1/242	52/6914	1	1	1	ENSG00000147873	1.00
hsa00260	Glycine, serine and threonine metabolism	1/242	40/6914	1	1	1	ENSG00000171314	1.00
hsa04612	Antigen processing and presentation	1/242	77/6914	1	1	1	ENSG00000118260	1.00
hsa01210	2-Oxocarboxylic acid metabolism	1/242	17/6914	1	1	1	ENSG00000182054	1.00
hsa04621	NOD-like receptor signaling pathway	2/242	57/6914	6.484e-01	1	2	ENSG00000165416 ENSG00000100030	1.00
hsa00071	Fatty acid degradation	1/242	44/6914	1	1	1	ENSG00000127884	1.00
hsa05222	Small cell lung cancer	3/242	86/6914	1	1	3	ENSG00000123975 ENSG00000105810 ENSG00000112769	1.00
hsa00062	Fatty acid elongation	1/242	25/6914	1	1	1	ENSG00000127884	1.00
hsa05134	Legionellosis	1/242	55/6914	1	1	1	ENSG00000172936	1.00
hsa00450	Selenocompound metabolism	1/242	17/6914	1	1	1	ENSG00000171097	1.00
hsa00130	Ubiquinone and other terpenoid-quinone biosynthesis	1/242	11/6914	1	1	1	ENSG00000173085	1.00
hsa00601	Glycosphingolipid biosynthesis - lacto and neolacto series	1/242	26/6914	1	1	1	ENSG00000117411	1.00
hsa00533	Glycosaminoglycan biosynthesis - keratan sulfate	1/242	15/6914	1	1	1	ENSG00000117411	1.00
hsa02010	ABC transporters	1/242	44/6914	1	1	1	ENSG00000154265	1.00
hsa03320	PPAR signaling pathway	1/242	69/6914	1	1	1	ENSG00000155368	1.00
hsa00350	Tyrosine metabolism	1/242	35/6914	1	1	1	ENSG00000240972	1.00
hsa00140	Steroid hormone biosynthesis	1/242	58/6914	1	1	1	ENSG00000196139	1.00
hsa04320	Dorso-ventral axis formation	1/242	27/6914	1	1	1	ENSG00000100030	1.00
hsa00052	Galactose metabolism	1/242	30/6914	1	1	1	ENSG00000117411	1.00
hsa00010	Glycolysis / Gluconeogenesis	1/242	67/6914	1	1	1	ENSG00000171314	1.00
hsa00590	Arachidonic acid metabolism	1/242	62/6914	1	1	1	ENSG00000196139	1.00
hsa01212	Fatty acid metabolism	1/242	48/6914	1	1	1	ENSG00000127884	1.00
hsa03030	DNA replication	1/242	36/6914	1	1	1	ENSG00000177084	1.00
hsa04310	Wnt signaling pathway	5/242	143/6914	1	1	5	ENSG00000107404 ENSG00000149782 ENSG00000177565 ENSG00000188763 ENSG00000112576	1.00
hsa04962	Vasopressin-regulated water reabsorption	1/242	44/6914	1	1	1	ENSG00000118260	1.00
hsa00620	Pyruvate metabolism	1/242	40/6914	1	1	1	ENSG00000103253	1.00
hsa00650	Butanoate metabolism	1/242	28/6914	1	1	1	ENSG00000127884	1.00
hsa00604	Glycosphingolipid biosynthesis - ganglio series	1/242	15/6914	1	1	1	ENSG00000101638	1.00
hsa04623	Cytosolic DNA-sensing pathway	1/242	64/6914	1	1	1	ENSG00000147873	1.00
hsa05211	Renal cell carcinoma	1/242	66/6914	1	1	1	ENSG00000100030	1.00
hsa00760	Nicotinate and nicotinamide metabolism	1/242	29/6914	1	1	1	ENSG00000205309	1.00
hsa05213	Endometrial cancer	1/242	52/6914	1	1	1	ENSG00000100030	1.00
hsa04213	Longevity regulating pathway - multiple species	1/242	64/6914	1	1	1	ENSG00000121281	1.00
hsa04024	cAMP signaling pathway	7/242	199/6914	8.008e-01	1	7	ENSG00000099822 ENSG00000121281 ENSG00000118260 ENSG00000143153 ENSG00000134215 ENSG00000100030 ENSG00000104899	1.00
hsa05030	Cocaine addiction	1/242	49/6914	1	1	1	ENSG00000118260	1.00
hsa04066	HIF-1 signaling pathway	1/242	103/6914	1	1	1	ENSG00000100030	1.00
hsa03015	mRNA surveillance pathway	1/242	91/6914	1	1	1	ENSG00000005007	1.00
hsa05020	Prion diseases	1/242	35/6914	1	1	1	ENSG00000100030	1.00
hsa03040	Spliceosome	1/242	134/6914	1	1	1	ENSG00000125835	1.00
hsa03050	Proteasome	1/242	44/6914	1	1	1	ENSG00000277791	1.00
hsa04923	Regulation of lipolysis in adipocytes	1/242	56/6914	1	1	1	ENSG00000121281	1.00
hsa05205	Proteoglycans in cancer	7/242	203/6914	1	1	7	ENSG00000113070 ENSG00000128591 ENSG00000063046 ENSG00000115884 ENSG00000197122 ENSG00000100030 ENSG00000188763	0.99
hsa04360	Axon guidance	6/242	173/6914	1	1	6	ENSG00000157851 ENSG00000197122 ENSG00000185033 ENSG00000135333 ENSG00000100030 ENSG00000113763	0.99
hsa04510	Focal adhesion	7/242	202/6914	1	1	7	ENSG00000128591 ENSG00000197122 ENSG00000148082 ENSG00000134215 ENSG00000100030 ENSG00000112576 ENSG00000112769	0.99
hsa04670	Leukocyte transendothelial migration	4/242	118/6914	1	1	4	ENSG00000213445 ENSG00000002586 ENSG00000134215 ENSG00000113946	0.97
hsa04727	GABAergic synapse	3/242	88/6914	1	1	3	ENSG00000121281 ENSG00000167083 ENSG00000197122	0.97
hsa05152	Tuberculosis	6/242	177/6914	1	1	6	ENSG00000197122 ENSG00000102189 ENSG00000118260 ENSG00000100030 ENSG00000147873 ENSG00000172936	0.97
hsa04730	Long-term depression	2/242	60/6914	1	1	2	ENSG00000100030 ENSG00000149782	0.95
hsa05032	Morphine addiction	3/242	91/6914	1	1	3	ENSG00000173020 ENSG00000121281 ENSG00000167083	0.94
hsa04370	VEGF signaling pathway	2/242	61/6914	1	1	2	ENSG00000197122 ENSG00000100030	0.94
hsa04666	Fc gamma R-mediated phagocytosis	3/242	92/6914	1	1	3	ENSG00000141934 ENSG00000134215 ENSG00000100030	0.93
hsa04064	NF-kappa B signaling pathway	3/242	92/6914	1	1	3	ENSG00000127666 ENSG00000177595 ENSG00000172936	0.93
hsa05210	Colorectal cancer	2/242	62/6914	1	1	2	ENSG00000089685 ENSG00000100030	0.92
hsa04151	PI3K-Akt signaling pathway	11/242	340/6914	1	1	11	ENSG00000187266 ENSG00000063046 ENSG00000167083 ENSG00000118260 ENSG00000105810 ENSG00000134308 ENSG00000100030 ENSG00000147873 ENSG00000168209 ENSG00000112576 ENSG00000112769	0.92
hsa04721	Synaptic vesicle cycle	2/242	63/6914	1	1	2	ENSG00000213760 ENSG00000131100	0.91
hsa04211	Longevity regulating pathway - mammal	3/242	94/6914	1	1	3	ENSG00000121281 ENSG00000118260 ENSG00000123395	0.91
hsa04921	Oxytocin signaling pathway	5/242	158/6914	1	1	5	ENSG00000121281 ENSG00000197122 ENSG00000100030 ENSG00000149782 ENSG00000167535	0.90
hsa04630	Jak-STAT signaling pathway	5/242	158/6914	1	1	5	ENSG00000187266 ENSG00000174564 ENSG00000147873 ENSG00000184995 ENSG00000112576	0.90
hsa04972	Pancreatic secretion	3/242	96/6914	1	1	3	ENSG00000121281 ENSG00000143153 ENSG00000149782	0.89
hsa04144	Endocytosis	8/242	258/6914	1	1	8	ENSG00000173020 ENSG00000135631 ENSG00000004059 ENSG00000197122 ENSG00000102189 ENSG00000165731 ENSG00000067606 ENSG00000108262	0.89
hsa04924	Renin secretion	2/242	64/6914	1	1	2	ENSG00000118260 ENSG00000149782	0.89
hsa04728	Dopaminergic synapse	4/242	129/6914	1	1	4	ENSG00000167083 ENSG00000141404 ENSG00000118260 ENSG00000149782	0.89
hsa05131	Shigellosis	2/242	65/6914	1	1	2	ENSG00000197122 ENSG00000100030	0.88
hsa04720	Long-term potentiation	2/242	66/6914	1	1	2	ENSG00000100030 ENSG00000149782	0.87
hsa05146	Amoebiasis	3/242	98/6914	1	1	3	ENSG00000141404 ENSG00000149782 ENSG00000112769	0.87
hsa04664	Fc epsilon RI signaling pathway	2/242	67/6914	1	1	2	ENSG00000134215 ENSG00000100030	0.85
hsa05162	Measles	4/242	135/6914	1	1	4	ENSG00000105810 ENSG00000147873 ENSG00000172936 ENSG00000112576	0.85
hsa04650	Natural killer cell mediated cytotoxicity	4/242	134/6914	1	1	4	ENSG00000148082 ENSG00000134215 ENSG00000100030 ENSG00000147873	0.85
hsa04068	FoxO signaling pathway	4/242	134/6914	1	1	4	ENSG00000157456 ENSG00000134057 ENSG00000051128 ENSG00000100030	0.85
hsa05231	Choline metabolism in cancer	3/242	101/6914	1	1	3	ENSG00000141934 ENSG00000100030 ENSG00000145214	0.85
hsa04141	Protein processing in endoplasmic reticulum	5/242	169/6914	1	1	5	ENSG00000175520 ENSG00000115275 ENSG00000160803 ENSG00000133265 ENSG00000101152	0.85
hsa03013	RNA transport	5/242	171/6914	1	1	5	ENSG00000063046 ENSG00000104131 ENSG00000142252 ENSG00000005007 ENSG00000169629	0.84
hsa00982	Drug metabolism - cytochrome P450	2/242	69/6914	1	1	2	ENSG00000008394 ENSG00000134202	0.83
hsa04530	Tight junction	4/242	139/6914	1	1	4	ENSG00000131899 ENSG00000197122 ENSG00000113946 ENSG00000067606	0.82
hsa04976	Bile secretion	2/242	71/6914	1	1	2	ENSG00000121281 ENSG00000143153	0.80
hsa04020	Calcium signaling pathway	5/242	179/6914	1	1	5	ENSG00000121281 ENSG00000161714 ENSG00000141404 ENSG00000149782 ENSG00000175938	0.80
hsa04514	Cell adhesion molecules (CAMs)	4/242	142/6914	1	1	4	ENSG00000115884 ENSG00000062038 ENSG00000002586 ENSG00000113946	0.80
hsa04550	Signaling pathways regulating pluripotency of stem cells	4/242	142/6914	1	1	4	ENSG00000107404 ENSG00000125968 ENSG00000100030 ENSG00000188763	0.80
hsa05140	Leishmaniasis	2/242	72/6914	1	1	2	ENSG00000100030 ENSG00000172936	0.79
hsa05206	MicroRNAs in cancer	7/242	256/6914	1	1	7	ENSG00000158402 ENSG00000146670 ENSG00000105810 ENSG00000137807 ENSG00000068028 ENSG00000100030 ENSG00000168209	0.78
hsa04668	TNF signaling pathway	3/242	110/6914	1	1	3	ENSG00000118260 ENSG00000100030 ENSG00000247077	0.78
hsa00980	Metabolism of xenobiotics by cytochrome P450	2/242	73/6914	1	1	2	ENSG00000008394 ENSG00000134202	0.78
hsa05412	Arrhythmogenic right ventricular cardiomyopathy (ARVC)	2/242	74/6914	1	1	2	ENSG00000160789 ENSG00000167535	0.77
hsa05168	Herpes simplex infection	5/242	185/6914	1	1	5	ENSG00000187778 ENSG00000170312 ENSG00000127666 ENSG00000147873 ENSG00000172936	0.77
hsa04726	Serotonergic synapse	3/242	112/6914	1	1	3	ENSG00000167083 ENSG00000100030 ENSG00000149782	0.77
hsa04520	Adherens junction	2/242	74/6914	1	1	2	ENSG00000197122 ENSG00000100030	0.77
hsa04060	Cytokine-cytokine receptor interaction	7/242	265/6914	1	1	7	ENSG00000187266 ENSG00000174564 ENSG00000181634 ENSG00000006327 ENSG00000147873 ENSG00000104899 ENSG00000184995	0.75
hsa04145	Phagosome	4/242	153/6914	1	1	4	ENSG00000167553 ENSG00000102189 ENSG00000213760 ENSG00000131100	0.75
hsa03018	RNA degradation	2/242	77/6914	1	1	2	ENSG00000144580 ENSG00000083520	0.74
hsa05145	Toxoplasmosis	3/242	118/6914	1	1	3	ENSG00000100030 ENSG00000172936 ENSG00000112769	0.73
hsa05100	Bacterial invasion of epithelial cells	2/242	78/6914	1	1	2	ENSG00000197122 ENSG00000148082	0.73
hsa04610	Complement and coagulation cascades	2/242	79/6914	1	1	2	ENSG00000085063 ENSG00000178726	0.72
hsa04270	Vascular smooth muscle contraction	3/242	120/6914	1	1	3	ENSG00000121281 ENSG00000100030 ENSG00000149782	0.71
hsa04742	Taste transduction	2/242	83/6914	1	1	2	ENSG00000127364 ENSG00000054179	0.69
hsa04152	AMPK signaling pathway	3/242	124/6914	1	1	3	ENSG00000145386 ENSG00000118260 ENSG00000072310	0.69
hsa04810	Regulation of actin cytoskeleton	5/242	214/6914	1	1	5	ENSG00000183856 ENSG00000197122 ENSG00000134215 ENSG00000100030 ENSG00000108262	0.67
hsa04640	Hematopoietic cell lineage	2/242	87/6914	1	1	2	ENSG00000187266 ENSG00000085063	0.66
hsa04380	Osteoclast differentiation	3/242	132/6914	1	1	3	ENSG00000118260 ENSG00000187098 ENSG00000100030	0.65
hsa05164	Influenza A	4/242	175/6914	1	1	4	ENSG00000127666 ENSG00000100030 ENSG00000147873 ENSG00000172936	0.65
hsa05323	Rheumatoid arthritis	2/242	89/6914	1	1	2	ENSG00000213760 ENSG00000131100	0.64
hsa05215	Prostate cancer	2/242	89/6914	1	1	2	ENSG00000118260 ENSG00000100030	0.64
hsa04120	Ubiquitin mediated proteolysis	3/242	137/6914	1	1	3	ENSG00000117399 ENSG00000134574 ENSG00000108106	0.63
hsa04014	Ras signaling pathway	5/242	227/6914	1	1	5	ENSG00000167083 ENSG00000170667 ENSG00000068028 ENSG00000148082 ENSG00000100030	0.63
hsa04974	Protein digestion and absorption	2/242	90/6914	1	1	2	ENSG00000104783 ENSG00000143153	0.63
hsa04010	MAPK signaling pathway	5/242	255/6914	1	1	5	ENSG00000120875 ENSG00000128591 ENSG00000149930 ENSG00000100030 ENSG00000167535	0.56
hsa04660	T cell receptor signaling pathway	2/242	104/6914	1	1	2	ENSG00000134215 ENSG00000100030	0.55
hsa04722	Neurotrophin signaling pathway	2/242	120/6914	1	1	2	ENSG00000148082 ENSG00000100030	0.48
hsa05169	Epstein-Barr virus infection	3/242	201/6914	1	1	3	ENSG00000145386 ENSG00000170312 ENSG00000134308	0.43
hsa04080	Neuroactive ligand-receptor interaction	4/242	277/6914	1	1	4	ENSG00000116329 ENSG00000244165 ENSG00000267534 ENSG00000100300	0.41
hsa04740	Olfactory transduction	4/242	413/6914	1	1	4	ENSG00000173020 ENSG00000140090 ENSG00000141404 ENSG00000197454	0.28

## Sheet: Sup Table Ⅱ
Table SII. Analysis of correlated expression of mRNAs and LncRNAs
Row	Column	Correlation	P-value	Gene
ENSG00000129810	NONHSAT168677.1	-0.900007	0.000942825	SGOL1
ENSG00000134222	ENST00000381639	0.90001	0.000942735	PSRC1
ENSG00000258472	NONHSAT183370.1	0.900013	0.000942644	RP11-192H23.4
ENSG00000278677	NONHSAT200243.1	-0.900015	0.000942575	HIST1H2AM
ENSG00000143153	ENST00000594576	-0.90002	0.000942426	ATP1B1
ENSG00000234965	NONHSAT163952.1	0.900028	0.000942181	SHISA8
ENSG00000109805	NONHSAT005235.2	-0.90004	0.000941789	NCAPG
ENSG00000148339	NONHSAT147961.2	0.900041	0.000941761	SLC25A25
ENSG00000178726	NONHSAT037592.2	0.900049	0.000941483	THBD
ENSG00000085644	NONHSAT215706.1	0.900053	0.000941374	ZNF213
ENSG00000035499	NONHSAT149978.1	0.900056	0.000941275	DEPDC1B
ENSG00000123080	NONHSAT162123.1	-0.900059	0.000941181	CDKN2C
ENSG00000183814	NONHSAT156713.1	0.900062	0.000941065	LIN9
ENSG00000182263	NONHSAT163526.1	-0.900065	0.000940975	FIGN
ENSG00000169692	NONHSAT118785.2	0.900068	0.000940899	AGPAT2
ENSG00000144488	NONHSAT156901.1	0.900071	0.000940784	ESPNL
ENSG00000155966	NONHSAT191017.1	0.900075	0.000940672	AFF2
ENSG00000131944	NONHSAT176684.1	-0.900075	0.000940668	FAAP24
ENSG00000135451	ENST00000505133	-0.900076	0.000940619	TROAP
ENSG00000185262	NONHSAT163526.1	0.900077	0.000940611	UBALD2
ENSG00000132481	NONHSAT022487.2	0.900083	0.000940417	TRIM47
ENSG00000197816	NONHSAT149381.1	0.900083	0.000940397	CCDC180
ENSG00000184995	ENST00000606839	0.900085	0.000940343	IFNE
ENSG00000173020	NONHSAT033795.2	0.900093	0.000940081	ADRBK1
ENSG00000146410	ENST00000530490	0.900094	0.000940063	MTFR2
ENSG00000142945	NONHSAT213988.1	-0.900103	0.000939751	KIF2C
ENSG00000182087	NONHSAT157283.1	0.900107	0.000939637	TMEM259
ENSG00000154839	NONHSAT162123.1	-0.900111	0.000939514	SKA1
ENSG00000051341	NONHSAT155504.1	-0.900114	0.000939398	POLQ
ENSG00000178726	NONHSAT118785.2	0.900133	0.000938818	THBD
ENSG00000100815	NONHSAT042166.2	0.900134	0.000938764	TRIP11
ENSG00000135333	NONHSAT070107.2	-0.900139	0.000938628	EPHA7
ENSG00000123080	NONHSAT175141.1	-0.90014	0.000938596	CDKN2C
ENSG00000131944	NONHSAT123532.2	0.900143	0.000938476	FAAP24
ENSG00000185829	ENST00000451781	-0.90015	0.000938272	ARL17A
ENSG00000090889	ENST00000530490	0.900151	0.000938244	KIF4A
ENSG00000179886	ENST00000589777	-0.900154	0.000938124	TIGD5
ENSG00000146918	NONHSAT118785.2	0.900159	0.000937961	NCAPG2
ENSG00000248235	NONHSAT157283.1	0.90017	0.000937612	AC037459.4
ENSG00000142632	ENST00000620490	-0.900173	0.000937539	ARHGEF19
ENSG00000137135	NONHSAT175142.1	-0.900175	0.000937456	ARHGEF39
ENSG00000160957	NONHSAT216957.1	0.90018	0.000937297	RECQL4
ENSG00000105997	ENST00000537869	0.900186	0.000937099	HOXA3
ENSG00000182263	NONHSAT162255.1	-0.90019	0.000936976	FIGN
ENSG00000146670	ENST00000530490	0.90019	0.000936971	CDCA5
ENSG00000231924	NONHSAT155562.1	0.900205	0.000936496	PSG1
ENSG00000215018	NONHSAT175141.1	0.900209	0.00093637	COL28A1
ENSG00000125968	NONHSAT037592.2	0.900216	0.000936165	ID1
ENSG00000198363	NONHSAT176260.1	-0.900217	0.000936139	ASPH
ENSG00000134222	ENST00000401788	0.90022	0.000936032	PSRC1
ENSG00000075218	NONHSAT162123.1	-0.90022	0.00093602	GTSE1
ENSG00000159216	NONHSAT175142.1	0.900224	0.000935911	RUNX1
ENSG00000121957	NONHSAT156713.1	0.900226	0.000935842	GPSM2
ENSG00000124635	NONHSAT144680.2	-0.900244	0.000935259	HIST1H2BJ
ENSG00000140326	NONHSAT211632.1	-0.900255	0.000934927	CDAN1
ENSG00000105997	NONHSAT163526.1	0.900256	0.000934876	HOXA3
ENSG00000104783	NONHSAT165541.1	-0.900265	0.000934583	KCNN4
ENSG00000181634	NONHSAT178478.1	0.900266	0.000934559	TNFSF15
ENSG00000024526	ENST00000606839	-0.90027	0.000934442	DEPDC1
ENSG00000242221	NONHSAT198315.1	0.900271	0.000934406	PSG2
ENSG00000226124	ENST00000623851	-0.900272	0.000934364	FTCDNL1
ENSG00000145860	ENST00000606839	0.900273	0.000934342	RNF145
ENSG00000203812	NONHSAT149381.1	-0.900277	0.000934199	HIST2H2AA3
ENSG00000132031	NONHSAT193897.1	-0.900282	0.000934052	MATN3
ENSG00000248483	ENST00000545631	0.900282	0.00093405	POU5F2
ENSG00000188542	NONHSAT194515.1	-0.900288	0.000933862	DUSP28
ENSG00000104883	NONHSAT163874.1	-0.900308	0.000933237	PEX11G
ENSG00000187164	NONHSAT180288.1	0.90031	0.00093316	SHTN1
ENSG00000131944	ENST00000623851	-0.900312	0.000933099	FAAP24
ENSG00000127884	NONHSAT021826.2	0.900321	0.00093281	ECHS1
ENSG00000243927	NONHSAT168803.1	0.900323	0.000932756	MRPS6
ENSG00000171320	ENST00000502693	0.900327	0.000932614	ESCO2
ENSG00000145220	NONHSAT163499.1	0.900338	0.000932256	LYAR
ENSG00000125409	ENST00000453342	0.900343	0.000932115	TEKT3
ENSG00000111665	NONHSAT107810.2	0.900359	0.00093161	CDCA3
ENSG00000231924	NONHSAT175647.1	0.900362	0.0009315	PSG1
ENSG00000198464	ENST00000556657	-0.900366	0.000931373	ZNF480
ENSG00000184922	NONHSAT200243.1	-0.900367	0.000931361	FMNL1
ENSG00000146410	NONHSAT189891.1	-0.900368	0.000931312	MTFR2
ENSG00000180777	NONHSAT212180.1	-0.900372	0.000931195	ANKRD30B
ENSG00000181218	NONHSAT135407.2	0.900379	0.000930977	HIST3H2A
ENSG00000135451	NONHSAT182451.1	-0.900384	0.000930797	TROAP
ENSG00000005801	NONHSAT188701.1	-0.900385	0.00093078	ZNF195
ENSG00000167723	ENST00000506899	-0.900388	0.000930673	TRPV3
ENSG00000276203	NONHSAT182459.1	0.900396	0.000930442	ANKRD20A3
ENSG00000113163	ENST00000427953	0.900396	0.000930426	COL4A3BP
ENSG00000139579	NONHSAT189891.1	-0.9004	0.000930302	NABP2
ENSG00000100030	NONHSAT194515.1	-0.900401	0.000930256	MAPK1
ENSG00000243927	NONHSAT028252.2	-0.900402	0.000930252	MRPS6
ENSG00000180834	NONHSAT156145.1	-0.900403	0.000930204	MAP6D1
ENSG00000275993	NONHSAT198315.1	-0.900416	0.000929808	CH507-42P11.8
ENSG00000275591	NONHSAT182446.1	-0.900417	0.000929763	XKR5
ENSG00000184922	NONHSAT162123.1	-0.900431	0.000929309	FMNL1
ENSG00000167106	NONHSAT072537.2	0.900434	0.000929232	FAM102A
ENSG00000272196	ENST00000552778	-0.900434	0.000929207	HIST2H2AA4
ENSG00000154479	NONHSAT219745.1	-0.900435	0.000929186	CCDC173
ENSG00000171462	ENST00000555518	0.900442	0.00092896	DLK2
ENSG00000108106	NONHSAT200243.1	-0.900446	0.000928831	UBE2S
ENSG00000104147	NONHSAT182446.1	-0.900447	0.000928797	OIP5
ENSG00000159216	NONHSAT188701.1	-0.900448	0.000928791	RUNX1
ENSG00000204370	NONHSAT183370.1	0.900449	0.000928733	SDHD
ENSG00000173559	NONHSAT208349.1	0.900452	0.000928665	NABP1
ENSG00000170312	NONHSAT153055.1	-0.90046	0.000928403	CDK1
ENSG00000161714	NONHSAT163874.1	-0.900465	0.000928251	PLCD3
ENSG00000104899	NONHSAT162123.1	-0.900478	0.000927835	AMH
ENSG00000168298	NONHSAT135407.2	0.900479	0.00092781	HIST1H1E
ENSG00000243927	ENST00000552778	0.90049	0.00092745	MRPS6
ENSG00000213626	NONHSAT142277.2	-0.900492	0.000927383	LBH
ENSG00000114054	NONHSAT216432.1	-0.900496	0.00092727	PCCB
ENSG00000187017	NONHSAT180590.1	0.900503	0.000927033	ESPN
ENSG00000187098	NONHSAT149381.1	0.900504	0.000927013	MITF
ENSG00000072310	NONHSAT188701.1	0.900505	0.000926981	SREBF1
ENSG00000160803	NONHSAT157731.1	0.900515	0.000926639	UBQLN4
ENSG00000139579	NONHSAT107810.2	0.900518	0.000926552	NABP2
ENSG00000272196	NONHSAT213988.1	-0.900539	0.000925884	HIST2H2AA4
ENSG00000113946	NONHSAT165541.1	0.900548	0.00092561	CLDN16
ENSG00000167889	NONHSAT118785.2	0.900548	0.000925601	MGAT5B
ENSG00000121318	NONHSAT168803.1	0.900551	0.000925528	TAS2R10
ENSG00000114779	NONHSAT118642.2	0.900554	0.000925418	ABHD14B
ENSG00000149782	NONHSAT182459.1	-0.900562	0.000925168	PLCB3
ENSG00000117399	NONHSAT216432.1	-0.900564	0.0009251	CDC20
ENSG00000131100	NONHSAT211819.1	-0.900569	0.00092493	ATP6V1E1
ENSG00000172889	ENST00000594576	0.900572	0.000924846	EGFL7
ENSG00000083520	ENST00000620490	0.900578	0.000924661	DIS3
ENSG00000133874	NONHSAT215706.1	0.900594	0.00092416	RNF122
ENSG00000147036	NONHSAT175142.1	0.900596	0.000924084	LANCL3
ENSG00000112053	ENST00000598625	0.900598	0.000924025	SLC26A8
ENSG00000147036	NONHSAT037545.2	0.9006	0.000923978	LANCL3
ENSG00000160298	NONHSAT211632.1	-0.900608	0.000923724	C21orf58
ENSG00000111247	NONHSAT182926.1	-0.90061	0.000923645	RAD51AP1
ENSG00000163930	NONHSAT162123.1	-0.900611	0.00092363	BAP1
ENSG00000150667	NONHSAT184726.1	-0.900621	0.000923309	FSIP1
ENSG00000157833	ENST00000605862	-0.900632	0.000922947	GAREM2
ENSG00000173020	NONHSAT188701.1	0.900645	0.000922559	ADRBK1
ENSG00000002586	ENST00000498304	-0.900648	0.000922459	CD99
ENSG00000159314	NONHSAT198315.1	-0.900649	0.000922416	ARHGAP27
ENSG00000154978	NONHSAT168677.1	-0.900651	0.000922362	VOPP1
ENSG00000146670	NONHSAT149978.1	0.900652	0.000922321	CDCA5
ENSG00000178726	NONHSAT070107.2	0.900654	0.000922259	THBD
ENSG00000072864	ENST00000621248	-0.900656	0.00092221	NDE1
ENSG00000213995	ENST00000586321	0.900657	0.000922165	CARKD
ENSG00000198959	NONHSAT163526.1	0.900658	0.000922137	TGM2
ENSG00000086300	ENST00000530490	0.900659	0.00092209	SNX10
ENSG00000165480	NONHSAT163874.1	-0.900661	0.000922049	SKA3
ENSG00000134574	NONHSAT193682.1	-0.900668	0.000921808	DDB2
ENSG00000185909	NONHSAT216957.1	0.900669	0.000921782	KLHDC8B
ENSG00000188763	ENST00000505133	-0.900671	0.000921725	FZD9
ENSG00000135314	NONHSAT168803.1	-0.900695	0.000920978	KHDC1
ENSG00000164611	NONHSAT221000.1	-0.9007	0.000920801	PTTG1
ENSG00000169629	NONHSAT135391.2	0.900702	0.000920743	RGPD8
ENSG00000131944	NONHSAT037576.2	0.900703	0.000920725	FAAP24
ENSG00000256861	ENST00000505133	0.90071	0.00092048	RP11-512M8.5
ENSG00000164611	ENST00000545688	0.900712	0.000920416	PTTG1
ENSG00000113163	NONHSAT032479.2	0.900714	0.000920371	COL4A3BP
ENSG00000137807	NONHSAT037592.2	0.900715	0.000920332	KIF23
ENSG00000167700	NONHSAT200447.1	0.90072	0.000920174	MFSD3
ENSG00000174564	ENST00000606839	0.900727	0.000919959	IL20RB
ENSG00000114054	NONHSAT069084.2	0.900728	0.000919925	PCCB
ENSG00000111665	ENST00000621248	-0.90074	0.000919541	CDCA3
ENSG00000251322	NONHSAT028252.2	0.900747	0.000919336	SHANK3
ENSG00000105810	NONHSAT188701.1	-0.900751	0.000919206	CDK6
ENSG00000164087	ENST00000537869	0.900751	0.000919202	POC1A
ENSG00000167723	NONHSAT182926.1	-0.900754	0.000919112	TRPV3
ENSG00000134202	NONHSAT193682.1	0.900756	0.000919029	GSTM3
ENSG00000167553	NONHSAT200243.1	-0.900759	0.000918952	TUBA1C
ENSG00000276203	ENST00000532319	0.900768	0.000918663	ANKRD20A3
ENSG00000002586	NONHSAT207026.1	-0.90078	0.000918295	CD99
ENSG00000215421	NONHSAT182446.1	0.90078	0.000918276	ZNF407
ENSG00000173653	ENST00000589777	-0.900783	0.00091818	RCE1
ENSG00000158402	NONHSAT184726.1	0.900794	0.000917843	CDC25C
ENSG00000178404	NONHSAT180590.1	-0.900796	0.000917782	CEP295NL
ENSG00000274641	ENST00000429962	0.900798	0.000917735	HIST1H2BO
ENSG00000105997	NONHSAT191017.1	-0.900815	0.000917201	HOXA3
ENSG00000183856	NONHSAT156713.1	0.900816	0.000917148	IQGAP3
ENSG00000150625	NONHSAT215705.1	0.900821	0.000916987	GPM6A
ENSG00000129195	ENST00000552778	-0.90083	0.000916721	FAM64A
ENSG00000100422	NONHSAT151590.1	0.90084	0.000916408	CERK
ENSG00000186638	NONHSAT107810.2	0.900851	0.000916062	KIF24
ENSG00000125731	NONHSAT200243.1	-0.900853	0.000916008	SH2D3A
ENSG00000159069	NONHSAT194515.1	-0.900857	0.00091586	FBXW5
ENSG00000081842	ENST00000585457	0.900859	0.000915809	PCDHA6
ENSG00000188542	NONHSAT156901.1	-0.900865	0.000915627	DUSP28
ENSG00000154839	NONHSAT156901.1	-0.900867	0.000915559	SKA1
ENSG00000197136	NONHSAT042166.2	-0.900871	0.000915431	PCNXL3
ENSG00000205309	NONHSAT131099.2	-0.900889	0.000914854	NT5M
ENSG00000151914	NONHSAT157283.1	-0.90089	0.000914844	DST
ENSG00000174165	NONHSAT157283.1	0.900907	0.0009143	ZDHHC24
ENSG00000163808	NONHSAT198315.1	-0.900915	0.000914053	KIF15
ENSG00000198796	NONHSAT190914.1	0.90092	0.000913878	ALPK2
ENSG00000168454	ENST00000586657	-0.900927	0.000913671	TXNDC2
ENSG00000165899	NONHSAT144680.2	0.900936	0.000913382	OTOGL
ENSG00000105821	ENST00000620490	0.900937	0.000913345	DNAJC2
ENSG00000160803	NONHSAT193682.1	-0.900949	0.000912975	UBQLN4
ENSG00000152253	ENST00000623851	-0.90095	0.000912954	SPC25
ENSG00000277075	NONHSAT176260.1	0.900952	0.000912888	HIST1H2AE
ENSG00000119411	NONHSAT180590.1	0.900952	0.000912887	BSPRY
ENSG00000148297	NONHSAT163874.1	-0.900961	0.000912608	MED22
ENSG00000151914	NONHSAT151590.1	-0.90098	0.000912008	DST
ENSG00000125968	NONHSAT163526.1	0.900984	0.000911892	ID1
ENSG00000178726	NONHSAT213988.1	-0.900984	0.000911887	THBD
ENSG00000187642	NONHSAT037592.2	-0.900987	0.000911801	PERM1
ENSG00000278828	NONHSAT176260.1	0.901002	0.000911309	HIST1H3H
ENSG00000104131	NONHSAT079348.2	0.901003	0.000911288	EIF3J
ENSG00000179958	NONHSAT028252.2	0.901004	0.000911267	DCTPP1
ENSG00000185261	NONHSAT208349.1	0.90101	0.000911061	KIAA0825
ENSG00000213626	ENST00000506340	0.901012	0.000911004	LBH
ENSG00000100221	ENST00000603538	0.901025	0.000910595	JOSD1
ENSG00000168702	NONHSAT135581.2	-0.901027	0.000910523	LRP1B
ENSG00000203814	NONHSAT184726.1	0.90103	0.000910447	HIST2H2BF
ENSG00000127989	ENST00000508913	-0.901035	0.000910274	MTERF1
ENSG00000107882	ENST00000623851	-0.901036	0.000910245	SUFU
ENSG00000174776	NONHSAT212026.1	-0.901047	0.000909906	WDR49
ENSG00000106009	NONHSAT157283.1	0.901048	0.000909895	BRAT1
ENSG00000169926	NONHSAT021826.2	0.901049	0.00090984	KLF13
ENSG00000164611	NONHSAT037576.2	0.901058	0.000909558	PTTG1
ENSG00000149930	NONHSAT194515.1	-0.901068	0.000909267	TAOK2
ENSG00000185361	NONHSAT182459.1	-0.901068	0.000909258	TNFAIP8L1
ENSG00000051341	ENST00000506340	0.901068	0.000909249	POLQ
ENSG00000127989	ENST00000440574	-0.90107	0.000909194	MTERF1
ENSG00000162735	ENST00000414209	0.901074	0.000909081	PEX19
ENSG00000167700	NONHSAT107810.2	0.901097	0.000908367	MFSD3
ENSG00000177508	NONHSAT162123.1	-0.901107	0.000908043	IRX3
ENSG00000156970	ENST00000594579	-0.901112	0.00090788	BUB1B
ENSG00000187778	NONHSAT190944.1	-0.901131	0.000907299	MCRS1
ENSG00000161800	NONHSAT162123.1	-0.901134	0.000907185	RACGAP1
ENSG00000115234	NONHSAT042166.2	-0.901144	0.000906893	SNX17
ENSG00000123159	NONHSAT183181.1	0.901156	0.000906498	GIPC1
ENSG00000143153	ENST00000530490	-0.901157	0.000906484	ATP1B1
ENSG00000160789	NONHSAT168803.1	-0.901169	0.000906098	LMNA
ENSG00000157456	NONHSAT135407.2	0.90117	0.000906066	CCNB2
ENSG00000006327	NONHSAT149978.1	0.901173	0.000905992	TNFRSF12A
ENSG00000185261	NONHSAT158445.1	-0.901177	0.000905853	KIAA0825
ENSG00000144488	NONHSAT221000.1	0.901181	0.000905725	ESPNL
ENSG00000156509	ENST00000502693	0.901183	0.000905671	FBXO43
ENSG00000188760	ENST00000620490	-0.901191	0.000905432	TMEM198
ENSG00000088826	NONHSAT028252.2	0.901195	0.000905287	SMOX
ENSG00000231924	ENST00000506340	-0.901207	0.000904925	PSG1
ENSG00000168702	NONHSAT099658.2	0.901207	0.000904914	LRP1B
ENSG00000134574	NONHSAT021826.2	0.901208	0.000904891	DDB2
ENSG00000054179	NONHSAT156713.1	0.90121	0.000904819	ENTPD2
ENSG00000178093	NONHSAT188701.1	0.901214	0.00090469	TSSK6
ENSG00000244607	NONHSAT175647.1	0.901216	0.00090463	CCDC13
ENSG00000113070	NONHSAT163874.1	0.90122	0.000904501	HBEGF
ENSG00000123136	ENST00000505133	-0.901222	0.000904462	DDX39A
ENSG00000128591	NONHSAT151256.1	0.901222	0.000904451	FLNC
ENSG00000215018	NONHSAT157731.1	-0.901224	0.000904391	COL28A1
ENSG00000055955	NONHSAT193897.1	-0.901225	0.000904351	ITIH4
ENSG00000182310	NONHSAT168803.1	0.901228	0.000904256	SPACA6
ENSG00000149541	NONHSAT215706.1	0.90123	0.000904205	B3GAT3
ENSG00000197587	NONHSAT216957.1	0.901232	0.000904138	DMBX1
ENSG00000188542	MSTRG.43944.16	-0.901233	0.000904108	DUSP28
ENSG00000072864	NONHSAT189891.1	-0.901234	0.000904092	NDE1
ENSG00000186222	NONHSAT155504.1	-0.901236	0.000904015	BLOC1S4
ENSG00000159216	NONHSAT156901.1	0.901237	0.000903979	RUNX1
ENSG00000197122	ENST00000603538	0.901239	0.000903926	SRC
ENSG00000031081	NONHSAT151649.1	0.901242	0.000903833	ARHGAP31
ENSG00000186628	NONHSAT037545.2	0.901244	0.000903755	FSD2
ENSG00000151572	ENST00000621248	-0.901245	0.00090375	ANO4
ENSG00000179958	NONHSAT163526.1	0.901255	0.000903429	DCTPP1
ENSG00000145734	ENST00000589777	0.901257	0.000903379	BDP1
ENSG00000140090	ENST00000594579	-0.901259	0.000903294	SLC24A4
ENSG00000278677	NONHSAT193682.1	-0.901261	0.000903234	HIST1H2AM
ENSG00000064652	NONHSAT062975.2	0.901267	0.000903048	SNX24
ENSG00000166250	NONHSAT153055.1	-0.901272	0.000902894	CLMP
ENSG00000206053	NONHSAT121213.2	0.901273	0.000902879	HN1L
ENSG00000144908	NONHSAT059018.2	0.901273	0.00090287	ALDH1L1
ENSG00000196705	NONHSAT153055.1	0.901275	0.000902814	ZNF431
ENSG00000154839	NONHSAT216432.1	-0.90128	0.00090264	SKA1
ENSG00000198826	ENST00000498304	-0.901283	0.000902553	ARHGAP11A
ENSG00000165480	NONHSAT198315.1	-0.901289	0.000902362	SKA3
ENSG00000168209	NONHSAT155504.1	-0.90129	0.000902349	DDIT4
ENSG00000117318	NONHSAT156901.1	-0.901291	0.000902294	ID3
ENSG00000134202	NONHSAT182459.1	0.901293	0.000902254	GSTM3
ENSG00000166912	NONHSAT180590.1	-0.901304	0.000901901	MTMR10
ENSG00000069943	NONHSAT175141.1	-0.901305	0.000901857	PIGB
ENSG00000113946	NONHSAT005235.2	0.901308	0.000901792	CLDN16
ENSG00000125835	NONHSAT163874.1	-0.901313	0.000901635	SNRPB
ENSG00000159216	NONHSAT001153.2	0.901313	0.000901609	RUNX1
ENSG00000125877	NONHSAT155504.1	-0.901324	0.000901276	ITPA
ENSG00000163870	NONHSAT107810.2	0.901326	0.000901229	TPRA1
ENSG00000104899	ENST00000586321	0.901326	0.000901213	AMH
ENSG00000186665	ENST00000505133	-0.901331	0.000901049	C17orf58
ENSG00000180834	NONHSAT198315.1	-0.901333	0.000901016	MAP6D1
ENSG00000083444	NONHSAT142277.2	-0.901336	0.000900893	PLOD1
ENSG00000135315	NONHSAT156901.1	0.901339	0.000900818	CEP162
ENSG00000169221	NONHSAT157283.1	0.901347	0.000900581	TBC1D10B
ENSG00000129810	NONHSAT158445.1	0.901381	0.000899515	SGOL1
ENSG00000152223	NONHSAT222719.1	0.901388	0.00089928	EPG5
ENSG00000149782	NONHSAT215706.1	0.901397	0.000899005	PLCB3
ENSG00000169607	ENST00000530490	0.901404	0.000898789	CKAP2L
ENSG00000137726	NONHSAT056661.2	0.901406	0.00089875	FXYD6
ENSG00000121957	NONHSAT216432.1	-0.90141	0.000898618	GPSM2
ENSG00000142178	NONHSAT199551.1	-0.901413	0.000898518	SIK1
ENSG00000063046	ENST00000475371	-0.901417	0.000898399	EIF4B
ENSG00000113391	NONHSAT149381.1	0.90142	0.000898316	FAM172A
ENSG00000113163	NONHSAT180414.1	0.901421	0.000898259	COL4A3BP
ENSG00000188763	NONHSAT183181.1	0.901424	0.000898172	FZD9
ENSG00000259571	NONHSAT136352.2	0.90143	0.000897985	BLID
ENSG00000215784	NONHSAT142277.2	-0.901431	0.000897954	FAM72D
ENSG00000031081	NONHSAT107810.2	-0.901434	0.000897854	ARHGAP31
ENSG00000064652	NONHSAT053671.2	0.901439	0.000897714	SNX24
ENSG00000169607	NONHSAT220333.1	-0.901442	0.000897632	CKAP2L
ENSG00000005007	NONHSAT190944.1	-0.901442	0.00089762	UPF1
ENSG00000166912	NONHSAT156901.1	0.901451	0.000897343	MTMR10
ENSG00000117318	NONHSAT118642.2	0.901453	0.000897291	ID3
ENSG00000155729	NONHSAT128586.2	-0.901461	0.000897044	KCTD18
ENSG00000213626	NONHSAT135407.2	0.901462	0.00089699	LBH
ENSG00000112149	ENST00000605862	-0.901474	0.000896643	CD83
ENSG00000140553	ENST00000505133	-0.901477	0.000896523	UNC45A
ENSG00000185187	ENST00000530490	0.901487	0.000896216	SIGIRR
ENSG00000184828	NONHSAT037545.2	-0.901488	0.000896199	ZBTB7C
ENSG00000005448	NONHSAT200243.1	-0.901492	0.000896061	WDR54
ENSG00000151914	NONHSAT163526.1	-0.901498	0.000895886	DST
ENSG00000244486	NONHSAT118785.2	0.901502	0.000895751	SCARF2
ENSG00000187634	NONHSAT163526.1	0.901511	0.0008955	SAMD11
ENSG00000135373	NONHSAT188701.1	-0.901514	0.000895393	EHF
ENSG00000137807	ENST00000429104	0.901515	0.000895369	KIF23
ENSG00000113070	NONHSAT168677.1	0.901525	0.000895041	HBEGF
ENSG00000103502	NONHSAT216432.1	-0.901526	0.000895035	CDIPT
ENSG00000113391	ENST00000621248	0.901526	0.000895034	FAM172A
ENSG00000171241	NONHSAT107810.2	0.901537	0.000894686	SHCBP1
ENSG00000005007	NONHSAT135581.2	0.901549	0.000894302	UPF1
ENSG00000178726	NONHSAT168677.1	-0.90155	0.000894283	THBD
ENSG00000112053	NONHSAT171185.1	0.901554	0.000894144	SLC26A8
ENSG00000137135	NONHSAT189891.1	-0.90156	0.000893974	ARHGEF39
ENSG00000244165	NONHSAT194204.1	0.901573	0.00089357	P2RY11
ENSG00000111247	NONHSAT107810.2	0.90158	0.000893364	RAD51AP1
ENSG00000010361	NONHSAT042166.2	-0.901587	0.000893151	FUZ
ENSG00000167325	NONHSAT200243.1	-0.901587	0.000893127	RRM1
ENSG00000101997	NONHSAT162123.1	-0.901589	0.00089308	CCDC22
ENSG00000155729	ENST00000602322	-0.901589	0.000893069	KCTD18
ENSG00000085063	ENST00000624967	0.901593	0.000892965	CD59
ENSG00000068489	NONHSAT221000.1	-0.901601	0.000892693	PRR11
ENSG00000172889	ENST00000603538	0.901603	0.000892658	EGFL7
ENSG00000069943	NONHSAT183370.1	0.901617	0.000892214	PIGB
ENSG00000167554	NONHSAT175647.1	0.901617	0.000892212	ZNF610
ENSG00000109674	NONHSAT188701.1	0.901622	0.000892044	NEIL3
ENSG00000113163	NONHSAT193897.1	0.901624	0.000892005	COL4A3BP
ENSG00000149930	NONHSAT180590.1	0.901626	0.000891929	TAOK2
ENSG00000174564	NONHSAT182459.1	0.901634	0.000891684	IL20RB
ENSG00000215784	NONHSAT198315.1	-0.901639	0.000891528	FAM72D
ENSG00000077420	NONHSAT180590.1	-0.901647	0.000891275	APBB1IP
ENSG00000147036	ENST00000554360	0.901648	0.00089125	LANCL3
ENSG00000107404	NONHSAT176627.1	0.901649	0.000891234	DVL1
ENSG00000171320	NONHSAT175141.1	-0.901651	0.000891158	ESCO2
ENSG00000168454	NONHSAT175141.1	0.901652	0.000891149	TXNDC2
ENSG00000067798	NONHSAT149381.1	0.901652	0.000891136	NAV3
ENSG00000186976	ENST00000620490	0.901654	0.000891064	EFCAB6
ENSG00000268193	ENST00000589777	0.901664	0.000890774	AC002985.3
ENSG00000187778	NONHSAT155504.1	-0.901664	0.000890761	MCRS1
ENSG00000134256	NONHSAT175141.1	0.901677	0.000890369	CD101
ENSG00000198363	NONHSAT178478.1	0.901678	0.000890342	ASPH
ENSG00000275993	ENST00000506899	-0.901679	0.000890296	CH507-42P11.8
ENSG00000125409	NONHSAT188701.1	-0.901681	0.000890232	TEKT3
ENSG00000083520	ENST00000621248	0.901684	0.000890161	DIS3
ENSG00000076826	ENST00000498304	-0.901702	0.000889596	CAMSAP3
ENSG00000243927	NONHSAT135407.2	-0.901704	0.00088953	MRPS6
ENSG00000090889	ENST00000506340	0.90171	0.000889339	KIF4A
ENSG00000129925	NONHSAT135581.2	0.90172	0.000889045	TMEM8A
ENSG00000178726	NONHSAT069084.2	0.901726	0.000888866	THBD
ENSG00000100030	ENST00000530490	0.901726	0.000888847	MAPK1
ENSG00000076382	NONHSAT213988.1	-0.901728	0.000888805	SPAG5
ENSG00000169629	NONHSAT167187.1	0.901739	0.000888467	RGPD8
ENSG00000072864	NONHSAT157731.1	0.901741	0.000888387	NDE1
ENSG00000085063	NONHSAT175646.1	0.901761	0.000887794	CD59
ENSG00000171241	NONHSAT163874.1	-0.901765	0.000887649	SHCBP1
ENSG00000129195	ENST00000606839	-0.901767	0.000887583	FAM64A
ENSG00000196705	NONHSAT072537.2	-0.901769	0.000887534	ZNF431
ENSG00000176945	NONHSAT190944.1	0.901771	0.000887475	MUC20
ENSG00000197858	NONHSAT033795.2	0.901785	0.000887027	GPAA1
ENSG00000278677	ENST00000506899	-0.901787	0.000886993	HIST1H2AM
ENSG00000123159	ENST00000505133	-0.901787	0.000886976	GIPC1
ENSG00000278677	NONHSAT221000.1	-0.901791	0.000886852	HIST1H2AM
ENSG00000124635	NONHSAT178478.1	-0.901797	0.000886677	HIST1H2BJ
ENSG00000184995	NONHSAT037592.2	-0.901799	0.000886615	IFNE
ENSG00000125319	NONHSAT118785.2	0.901817	0.000886051	C17orf53
ENSG00000177595	NONHSAT216957.1	0.901821	0.000885935	PIDD1
ENSG00000125968	ENST00000506899	-0.901823	0.000885866	ID1
ENSG00000055955	NONHSAT083319.2	-0.90183	0.000885673	ITIH4
ENSG00000140553	NONHSAT176684.1	-0.901832	0.000885587	UNC45A
ENSG00000076382	NONHSAT168677.1	-0.901837	0.000885436	SPAG5
ENSG00000213626	NONHSAT182459.1	-0.90184	0.000885357	LBH
ENSG00000159314	NONHSAT163874.1	-0.901842	0.000885291	ARHGAP27
ENSG00000051341	NONHSAT149978.1	0.901849	0.000885074	POLQ
ENSG00000155287	ENST00000429962	0.901851	0.000885023	SLC25A28
ENSG00000119333	ENST00000451781	0.901852	0.000884984	WDR34
ENSG00000012232	NONHSAT143762.2	0.901855	0.000884887	EXTL3
ENSG00000146918	NONHSAT135407.2	0.901861	0.000884703	NCAPG2
ENSG00000075218	NONHSAT178478.1	-0.901866	0.000884542	GTSE1
ENSG00000100422	NONHSAT155504.1	-0.901871	0.00088441	CERK
ENSG00000124635	NONHSAT208349.1	-0.901872	0.000884371	HIST1H2BJ
ENSG00000112182	NONHSAT107810.2	-0.901882	0.000884081	BACH2
ENSG00000184357	NONHSAT176260.1	0.901891	0.000883783	HIST1H1B
ENSG00000140534	ENST00000606839	-0.901894	0.000883692	TICRR
ENSG00000173020	NONHSAT162255.1	0.901899	0.000883548	ADRBK1
ENSG00000213672	ENST00000620617	0.901919	0.000882946	NCKIPSD
ENSG00000166912	ENST00000498304	0.901919	0.00088294	MTMR10
ENSG00000136122	ENST00000429962	0.901923	0.000882807	BORA
ENSG00000123080	NONHSAT005235.2	-0.901939	0.000882308	CDKN2C
ENSG00000187017	NONHSAT124339.2	0.901958	0.000881751	ESPN
ENSG00000142945	NONHSAT032479.2	-0.90196	0.000881681	KIF2C
ENSG00000128591	NONHSAT190914.1	0.901968	0.000881439	FLNC
ENSG00000155287	NONHSAT157138.1	0.901969	0.000881399	SLC25A28
ENSG00000160957	NONHSAT199551.1	-0.90197	0.000881365	RECQL4
ENSG00000165731	ENST00000596594	0.901979	0.00088109	RET
ENSG00000100422	ENST00000603538	0.901983	0.000880968	CERK
ENSG00000277957	NONHSAT163863.1	0.901986	0.000880879	SENP3-EIF4A1
ENSG00000146670	NONHSAT182459.1	-0.901994	0.000880651	CDCA5
ENSG00000106541	ENST00000505133	0.901998	0.000880517	AGR2
ENSG00000167543	NONHSAT135581.2	0.902033	0.00087946	TP53I13
ENSG00000146410	ENST00000439129	-0.902036	0.000879346	MTFR2
ENSG00000242419	NONHSAT213988.1	0.902037	0.000879328	PCDHGC4
ENSG00000105810	NONHSAT027870.2	0.902044	0.000879124	CDK6
ENSG00000110651	NONHSAT163874.1	-0.902047	0.000879017	CD81
ENSG00000002586	ENST00000500112	-0.902051	0.000878895	CD99
ENSG00000160298	NONHSAT182446.1	-0.902054	0.000878803	C21orf58
ENSG00000156509	NONHSAT099658.2	-0.902067	0.000878405	FBXO43
ENSG00000173559	NONHSAT193682.1	0.902078	0.000878071	NABP1
ENSG00000139579	NONHSAT135581.2	0.902086	0.000877844	NABP2
ENSG00000077463	NONHSAT157283.1	0.902086	0.000877829	SIRT6
ENSG00000179958	NONHSAT118785.2	0.902091	0.000877669	DCTPP1
ENSG00000268447	NONHSAT107810.2	-0.902095	0.000877561	SSX2B
ENSG00000187634	NONHSAT151590.1	0.902096	0.000877534	SAMD11
ENSG00000155367	NONHSAT200447.1	0.902096	0.000877514	PPM1J
ENSG00000125968	NONHSAT182459.1	-0.902097	0.000877506	ID1
ENSG00000138433	NONHSAT023756.2	0.90211	0.000877084	CIR1
ENSG00000075218	ENST00000623851	-0.902112	0.00087703	GTSE1
ENSG00000135373	ENST00000621248	0.902114	0.000876973	EHF
ENSG00000134107	NONHSAT189891.1	-0.902116	0.000876918	BHLHE40
ENSG00000147873	NONHSAT037592.2	-0.902122	0.00087673	IFNA5
ENSG00000114779	ENST00000506340	0.902122	0.000876722	ABHD14B
ENSG00000117399	ENST00000621248	-0.902135	0.00087633	CDC20
ENSG00000135373	ENST00000623851	0.902141	0.000876161	EHF
ENSG00000100422	NONHSAT175141.1	-0.902148	0.000875947	CERK
ENSG00000154978	ENST00000505133	-0.90215	0.000875882	VOPP1
ENSG00000146918	NONHSAT107810.2	0.902174	0.000875142	NCAPG2
ENSG00000184995	NONHSAT156713.1	-0.902177	0.000875054	IFNE
ENSG00000109016	ENST00000506899	-0.902181	0.000874923	DHRS7B
ENSG00000088826	NONHSAT185911.1	0.902182	0.000874919	SMOX
ENSG00000002586	NONHSAT118738.2	-0.902186	0.000874789	CD99
ENSG00000119938	ENST00000603538	0.902199	0.000874395	PPP1R3C
ENSG00000168356	NONHSAT213988.1	0.9022	0.000874352	SCN11A
ENSG00000148154	NONHSAT180414.1	0.902204	0.000874248	UGCG
ENSG00000167900	ENST00000603538	0.902215	0.000873897	TK1
ENSG00000234965	NONHSAT190944.1	-0.902216	0.00087387	SHISA8
ENSG00000235106	NONHSAT216432.1	-0.902217	0.000873835	LINC00094
ENSG00000140995	NONHSAT215705.1	-0.902221	0.000873706	DEF8
ENSG00000157456	NONHSAT189891.1	-0.902223	0.000873664	CCNB2
ENSG00000133874	NONHSAT135407.2	0.902226	0.00087357	RNF122
ENSG00000160803	NONHSAT162255.1	0.902252	0.000872788	UBQLN4
ENSG00000129968	NONHSAT200243.1	-0.902257	0.000872632	ABHD17A
ENSG00000011007	NONHSAT198315.1	-0.902261	0.000872497	TCEB3
ENSG00000111860	NONHSAT180361.1	0.902266	0.000872338	CEP85L
ENSG00000168874	NONHSAT141113.2	-0.902267	0.000872332	ATOH8
ENSG00000157456	NONHSAT032479.2	-0.902269	0.000872247	CCNB2
ENSG00000117399	ENST00000498304	-0.90227	0.000872229	CDC20
ENSG00000069011	NONHSAT182446.1	-0.90227	0.000872221	PITX1
ENSG00000197409	NONHSAT215705.1	-0.902272	0.000872179	HIST1H3D
ENSG00000187642	NONHSAT200243.1	0.902272	0.000872176	PERM1
ENSG00000146670	NONHSAT168803.1	-0.902272	0.000872157	CDCA5
ENSG00000182809	NONHSAT158445.1	0.902273	0.000872133	CRIP2
ENSG00000159314	ENST00000505133	-0.902274	0.000872103	ARHGAP27
ENSG00000198959	NONHSAT183181.1	0.902276	0.000872037	TGM2
ENSG00000136560	NONHSAT131099.2	0.902285	0.000871772	TANK
ENSG00000188993	NONHSAT168677.1	0.902293	0.000871547	LRRC66
ENSG00000242221	NONHSAT135407.2	-0.902298	0.000871371	PSG2
ENSG00000105821	NONHSAT165541.1	0.902301	0.00087128	DNAJC2
ENSG00000104883	NONHSAT180590.1	0.902306	0.000871135	PEX11G
ENSG00000105810	ENST00000498304	0.90231	0.000871006	CDK6
ENSG00000275993	NONHSAT135581.2	0.902324	0.0008706	CH507-42P11.8
ENSG00000126903	NONHSAT220663.1	0.902349	0.000869826	SLC10A3
ENSG00000151572	NONHSAT107810.2	0.90235	0.000869813	ANO4
ENSG00000197816	NONHSAT156901.1	0.902352	0.000869753	CCDC180
ENSG00000143603	NONHSAT215705.1	0.902354	0.000869695	KCNN3
ENSG00000188993	ENST00000596594	-0.902354	0.000869674	LRRC66
ENSG00000011007	NONHSAT180590.1	0.902355	0.000869666	TCEB3
ENSG00000120802	NONHSAT021826.2	0.902365	0.00086934	TMPO
ENSG00000279765	ENST00000552778	0.902373	0.000869114	RP11-437B10.1
ENSG00000119938	ENST00000596594	0.902375	0.000869062	PPP1R3C
ENSG00000051341	NONHSAT175148.1	-0.902375	0.000869041	POLQ
ENSG00000177225	NONHSAT190944.1	-0.902381	0.000868867	PDDC1
ENSG00000131653	NONHSAT180288.1	-0.902385	0.000868732	TRAF7
ENSG00000143224	NONHSAT005235.2	-0.902387	0.000868697	PPOX
ENSG00000123395	NONHSAT165541.1	-0.902392	0.000868544	ATG101
ENSG00000106789	NONHSAT118785.2	0.902419	0.000867721	CORO2A
ENSG00000123080	ENST00000623851	-0.902422	0.000867623	CDKN2C
ENSG00000186628	NONHSAT182926.1	0.902423	0.000867591	FSD2
ENSG00000123240	ENST00000506340	-0.902424	0.000867557	OPTN
ENSG00000166250	ENST00000453342	-0.902429	0.000867401	CLMP
ENSG00000196597	NONHSAT176260.1	-0.902435	0.000867227	ZNF782
ENSG00000171241	ENST00000506899	-0.902437	0.00086716	SHCBP1
ENSG00000184897	ENST00000620490	-0.902456	0.000866612	H1FX
ENSG00000275464	NONHSAT157283.1	0.902466	0.00086631	CH507-9B2.5
ENSG00000167723	ENST00000530490	0.902477	0.000865966	TRPV3
ENSG00000101255	NONHSAT023756.2	-0.902477	0.000865956	TRIB3
ENSG00000196155	NONHSAT023756.2	-0.902484	0.00086574	PLEKHG4
ENSG00000081842	NONHSAT170784.1	0.902493	0.000865479	PCDHA6
ENSG00000121318	ENST00000621248	0.902502	0.000865217	TAS2R10
ENSG00000241945	NONHSAT028252.2	0.902502	0.000865214	PWP2
ENSG00000102996	ENST00000594576	0.902503	0.000865179	MMP15
ENSG00000104783	ENST00000475371	0.90252	0.000864675	KCNN4
ENSG00000173559	NONHSAT221000.1	0.902526	0.00086449	NABP1
ENSG00000145860	ENST00000414209	-0.902527	0.000864464	RNF145
ENSG00000167645	NONHSAT107810.2	0.902535	0.000864217	YIF1B
ENSG00000203812	ENST00000623851	-0.902536	0.000864182	HIST2H2AA3
ENSG00000175352	NONHSAT135407.2	0.902536	0.000864176	NRIP3
ENSG00000150625	NONHSAT107810.2	-0.90254	0.00086405	GPM6A
ENSG00000277791	NONHSAT069084.2	0.902545	0.000863921	PSMB3
ENSG00000259571	NONHSAT171185.1	0.902548	0.000863832	BLID
ENSG00000182054	NONHSAT156901.1	-0.902548	0.000863817	IDH2
ENSG00000105287	ENST00000594576	0.902549	0.000863801	PRKD2
ENSG00000162817	NONHSAT200243.1	0.902558	0.000863526	C1orf115
ENSG00000174165	NONHSAT183181.1	0.902571	0.000863124	ZDHHC24
ENSG00000244607	NONHSAT212180.1	-0.902574	0.000863022	CCDC13
ENSG00000072864	ENST00000591069	0.902581	0.000862824	NDE1
ENSG00000140995	ENST00000623851	-0.902584	0.000862744	DEF8
ENSG00000124440	NONHSAT175141.1	0.90259	0.000862552	HIF3A
ENSG00000272196	NONHSAT142277.2	-0.902596	0.000862375	HIST2H2AA4
ENSG00000180834	NONHSAT163526.1	0.902605	0.000862114	MAP6D1
ENSG00000105997	ENST00000453342	-0.902616	0.000861763	HOXA3
ENSG00000187642	NONHSAT182451.1	0.902624	0.000861517	PERM1
ENSG00000139209	NONHSAT180414.1	0.902626	0.000861476	SLC38A4
ENSG00000055955	NONHSAT136352.2	-0.902633	0.000861252	ITIH4
ENSG00000198354	NONHSAT194515.1	-0.902634	0.00086122	DCAF12L2
ENSG00000151914	ENST00000621248	0.902649	0.000860779	DST
ENSG00000183578	NONHSAT213988.1	-0.902667	0.00086024	TNFAIP8L3
ENSG00000106541	NONHSAT023756.2	0.902672	0.000860097	AGR2
ENSG00000101084	NONHSAT001153.2	-0.902676	0.000859978	C20orf24
ENSG00000125319	NONHSAT215705.1	-0.902683	0.000859763	C17orf53
ENSG00000187266	ENST00000603538	0.902694	0.000859423	EPOR
ENSG00000164087	NONHSAT005235.2	-0.9027	0.000859248	POC1A
ENSG00000188763	NONHSAT163499.1	-0.902704	0.000859125	FZD9
ENSG00000115268	ENST00000585457	0.902706	0.000859064	RPS15
ENSG00000181218	NONHSAT070107.2	0.90271	0.000858949	HIST3H2A
ENSG00000125835	NONHSAT023756.2	-0.902712	0.000858892	SNRPB
ENSG00000138379	ENST00000427953	0.902717	0.000858743	MSTN
ENSG00000149930	NONHSAT156901.1	-0.902736	0.000858155	TAOK2
ENSG00000133773	NONHSAT182446.1	0.902745	0.000857902	CCDC59
ENSG00000163808	NONHSAT017767.2	0.902747	0.00085784	KIF15
ENSG00000127561	ENST00000624248	-0.902753	0.000857658	SYNGR3
ENSG00000079308	NONHSAT118705.2	0.902755	0.000857598	TNS1
ENSG00000157456	NONHSAT142277.2	-0.902758	0.000857499	CCNB2
ENSG00000138379	ENST00000554360	0.902761	0.000857408	MSTN
ENSG00000275993	NONHSAT001153.2	-0.902769	0.000857185	CH507-42P11.8
ENSG00000051341	ENST00000594579	-0.902775	0.000857	POLQ
ENSG00000187778	NONHSAT216957.1	0.902776	0.000856961	MCRS1
ENSG00000121957	NONHSAT151590.1	0.902776	0.000856952	GPSM2
ENSG00000134057	NONHSAT156713.1	0.902784	0.000856721	CCNB1
ENSG00000244255	NONHSAT022132.2	0.902785	0.000856698	XXbac-BPG116M5.17
ENSG00000185829	NONHSAT162123.1	0.902785	0.000856684	ARL17A
ENSG00000197409	NONHSAT182446.1	-0.902787	0.00085664	HIST1H3D
ENSG00000154839	NONHSAT099658.2	-0.902792	0.000856487	SKA1
ENSG00000111860	NONHSAT153055.1	-0.902793	0.000856452	CEP85L
ENSG00000164109	NONHSAT200243.1	-0.902797	0.000856328	MAD2L1
ENSG00000155729	NONHSAT176684.1	-0.902798	0.000856307	KCTD18
ENSG00000124143	NONHSAT193682.1	0.902798	0.000856305	ARHGAP40
ENSG00000102189	NONHSAT001153.2	0.902803	0.000856169	EEA1
ENSG00000101084	NONHSAT163499.1	-0.902805	0.000856098	C20orf24
ENSG00000183814	NONHSAT216432.1	-0.90281	0.000855951	LIN9
ENSG00000168298	NONHSAT175148.1	-0.902825	0.000855488	HIST1H1E
ENSG00000180777	NONHSAT182446.1	0.902828	0.000855418	ANKRD30B
ENSG00000088826	NONHSAT163874.1	-0.902829	0.000855373	SMOX
ENSG00000164309	NONHSAT175646.1	-0.902829	0.000855372	CMYA5
ENSG00000167543	ENST00000603538	0.902832	0.000855278	TP53I13
ENSG00000198846	NONHSAT194515.1	0.902835	0.000855192	TOX
ENSG00000213799	NONHSAT184726.1	0.902841	0.000855017	ZNF845
ENSG00000145214	NONHSAT135581.2	0.902845	0.000854907	DGKQ
ENSG00000178035	NONHSAT156901.1	-0.902847	0.000854844	IMPDH2
ENSG00000125877	ENST00000591069	0.902847	0.000854844	ITPA
ENSG00000020577	NONHSAT056663.2	0.902848	0.000854822	SAMD4A
ENSG00000023909	NONHSAT037545.2	0.90286	0.000854452	GCLM
ENSG00000176945	NONHSAT144554.2	0.90286	0.000854448	MUC20
ENSG00000123975	NONHSAT107810.2	0.902867	0.000854251	CKS2
ENSG00000132016	NONHSAT163874.1	-0.902868	0.000854221	C19orf57
ENSG00000117724	NONHSAT175141.1	-0.902872	0.000854076	CENPF
ENSG00000143228	NONHSAT163499.1	-0.90288	0.000853841	NUF2
ENSG00000166803	NONHSAT037576.2	0.902889	0.000853568	KIAA0101
ENSG00000197122	NONHSAT163526.1	0.902892	0.000853496	SRC
ENSG00000180891	NONHSAT175141.1	-0.902895	0.0008534	CUEDC1
ENSG00000185829	NONHSAT215705.1	0.9029	0.000853259	ARL17A
ENSG00000185909	NONHSAT107810.2	0.902906	0.000853069	KLHDC8B
ENSG00000132031	NONHSAT001153.2	-0.902919	0.000852669	MATN3
ENSG00000100815	MSTRG.43944.16	0.902921	0.000852614	TRIP11
ENSG00000178404	NONHSAT183181.1	-0.902929	0.000852384	CEP295NL
ENSG00000157456	ENST00000505133	-0.90293	0.00085235	CCNB2
ENSG00000213626	NONHSAT028252.2	0.902933	0.000852254	LBH
ENSG00000226124	NONHSAT194515.1	-0.902937	0.000852139	FTCDNL1
ENSG00000122863	ENST00000506899	-0.902943	0.000851962	CHST3
ENSG00000145386	ENST00000506899	-0.902947	0.00085186	CCNA2
ENSG00000144488	NONHSAT037545.2	0.902948	0.000851819	ESPNL
ENSG00000069943	NONHSAT158445.1	0.902962	0.000851403	PIGB
ENSG00000150667	ENST00000552778	0.902967	0.000851241	FSIP1
ENSG00000145860	NONHSAT183370.1	-0.902969	0.0008512	RNF145
ENSG00000134107	NONHSAT200243.1	-0.902973	0.000851066	BHLHE40
ENSG00000100030	ENST00000594576	0.90298	0.000850856	MAPK1
ENSG00000159314	ENST00000537869	0.902983	0.000850773	ARHGAP27
ENSG00000180834	NONHSAT131099.2	-0.902985	0.000850701	MAP6D1
ENSG00000198959	NONHSAT200243.1	-0.902989	0.000850582	TGM2
ENSG00000181143	NONHSAT162255.1	-0.902997	0.000850366	MUC16
ENSG00000154978	ENST00000530490	0.902997	0.000850364	VOPP1
ENSG00000185038	ENST00000606839	0.90302	0.00084966	MROH2A
ENSG00000164109	NONHSAT183370.1	0.903028	0.000849444	MAD2L1
ENSG00000095383	NONHSAT180590.1	0.903028	0.000849434	TBC1D2
ENSG00000157456	NONHSAT168677.1	-0.90303	0.000849364	CCNB2
ENSG00000114779	NONHSAT118802.2	0.903031	0.000849349	ABHD14B
ENSG00000127666	ENST00000586321	0.903033	0.000849273	TICAM1
ENSG00000165899	NONHSAT193682.1	0.903035	0.000849209	OTOGL
ENSG00000105821	NONHSAT180590.1	-0.903042	0.000849023	DNAJC2
ENSG00000244607	NONHSAT047830.2	0.903046	0.000848897	CCDC13
ENSG00000170312	NONHSAT175141.1	-0.903055	0.000848635	CDK1
ENSG00000101997	NONHSAT175141.1	-0.903056	0.000848608	CCDC22
ENSG00000110628	ENST00000451781	0.903056	0.000848607	SLC22A18
ENSG00000077420	ENST00000623851	0.903057	0.000848554	APBB1IP
ENSG00000165480	ENST00000594579	-0.90306	0.000848476	SKA3
ENSG00000153714	NONHSAT162123.1	0.903061	0.000848436	LURAP1L
ENSG00000004399	NONHSAT175141.1	-0.903078	0.000847933	PLXND1
ENSG00000275993	ENST00000594576	0.903082	0.000847835	CH507-42P11.8
ENSG00000183856	NONHSAT032479.2	-0.903093	0.000847504	IQGAP3
ENSG00000178726	NONHSAT151590.1	0.903096	0.000847407	THBD
ENSG00000184995	ENST00000429104	-0.903105	0.000847141	IFNE
ENSG00000159216	NONHSAT184726.1	-0.903106	0.000847098	RUNX1
ENSG00000254470	NONHSAT183181.1	0.903111	0.000846947	AP5B1
ENSG00000198846	NONHSAT199551.1	0.903114	0.000846865	TOX
ENSG00000149782	NONHSAT188701.1	0.903121	0.000846664	PLCB3
ENSG00000160298	NONHSAT183181.1	0.903121	0.000846649	C21orf58
ENSG00000182263	NONHSAT182926.1	0.903131	0.000846361	FIGN
ENSG00000145337	NONHSAT042166.2	-0.903132	0.000846344	PYURF
ENSG00000118407	NONHSAT081842.2	0.903132	0.000846322	FILIP1
ENSG00000176393	NONHSAT183181.1	0.903135	0.000846256	RNPEP
ENSG00000180891	NONHSAT222699.1	0.903146	0.000845905	CUEDC1
ENSG00000135373	NONHSAT178478.1	0.903149	0.000845826	EHF
ENSG00000167083	NONHSAT175148.1	0.903149	0.000845818	GNGT2
ENSG00000165887	NONHSAT001153.2	-0.90315	0.000845801	ANKRD2
ENSG00000151914	ENST00000620617	-0.903158	0.000845563	DST
ENSG00000069943	NONHSAT180590.1	0.903159	0.000845543	PIGB
ENSG00000198113	ENST00000594576	0.90316	0.000845514	TOR4A
ENSG00000167645	ENST00000537869	0.903168	0.000845258	YIF1B
ENSG00000139209	NONHSAT198315.1	0.90317	0.000845193	SLC38A4
ENSG00000161996	ENST00000589777	-0.903176	0.000845021	WDR90
ENSG00000146918	NONHSAT021826.2	0.903178	0.00084497	NCAPG2
ENSG00000164309	ENST00000624248	0.903183	0.000844808	CMYA5
ENSG00000117650	NONHSAT198315.1	-0.903184	0.000844801	NEK2
ENSG00000108106	NONHSAT107810.2	0.90319	0.000844606	UBE2S
ENSG00000068489	NONHSAT190914.1	-0.903198	0.000844378	PRR11
ENSG00000149541	NONHSAT175141.1	-0.903202	0.000844253	B3GAT3
ENSG00000123975	NONHSAT037576.2	0.90321	0.000844015	CKS2
ENSG00000213626	NONHSAT182446.1	-0.903213	0.000843937	LBH
ENSG00000180758	NONHSAT182446.1	-0.903215	0.000843884	GPR157
ENSG00000100124	ENST00000589777	-0.903217	0.000843821	ANKRD54
ENSG00000154839	NONHSAT119833.2	0.903224	0.000843606	SKA1
ENSG00000183814	NONHSAT118642.2	0.903226	0.000843536	LIN9
ENSG00000179886	NONHSAT163253.1	0.903229	0.000843454	TIGD5
ENSG00000145860	NONHSAT005235.2	0.903235	0.000843269	RNF145
ENSG00000251322	NONHSAT149978.1	0.903237	0.000843212	SHANK3
ENSG00000146410	NONHSAT032479.2	-0.903247	0.000842923	MTFR2
ENSG00000005448	NONHSAT118785.2	0.903248	0.000842877	WDR54
ENSG00000125409	NONHSAT194515.1	0.903252	0.000842772	TEKT3
ENSG00000170312	ENST00000554360	-0.903255	0.000842683	CDK1
ENSG00000196550	NONHSAT192024.1	0.903258	0.000842601	FAM72A
ENSG00000135315	NONHSAT165541.1	0.903264	0.000842426	CEP162
ENSG00000181218	ENST00000498304	-0.903275	0.000842088	HIST3H2A
ENSG00000134057	NONHSAT182451.1	-0.903286	0.000841769	CCNB1
ENSG00000161800	NONHSAT142277.2	-0.903288	0.000841702	RACGAP1
ENSG00000278463	ENST00000623851	-0.903294	0.000841523	HIST1H2AB
ENSG00000111247	NONHSAT119833.2	0.903298	0.000841397	RAD51AP1
ENSG00000135315	NONHSAT162255.1	-0.9033	0.00084136	CEP162
ENSG00000143776	NONHSAT144680.2	0.903312	0.000841003	CDC42BPA
ENSG00000164611	NONHSAT163874.1	-0.903314	0.000840939	PTTG1
ENSG00000076826	NONHSAT070107.2	0.903316	0.000840871	CAMSAP3
ENSG00000076382	NONHSAT168803.1	-0.903325	0.000840625	SPAG5
ENSG00000189043	NONHSAT185911.1	0.903332	0.000840416	NDUFA4
ENSG00000105376	ENST00000623851	-0.903338	0.000840239	ICAM5
ENSG00000144136	NONHSAT163874.1	-0.903338	0.000840232	SLC20A1
ENSG00000124507	NONHSAT199551.1	0.903341	0.000840148	PACSIN1
ENSG00000173559	NONHSAT156901.1	0.903344	0.000840039	NABP1
ENSG00000144488	NONHSAT053931.2	0.903348	0.000839938	ESPNL
ENSG00000138629	ENST00000449500	0.903349	0.0008399	UBL7
ENSG00000251322	ENST00000506899	-0.903362	0.000839509	SHANK3
ENSG00000215018	ENST00000537869	-0.903369	0.000839309	COL28A1
ENSG00000205138	NONHSAT163874.1	-0.903371	0.000839243	SDHAF1
ENSG00000148082	NONHSAT199551.1	0.903383	0.000838906	SHC3
ENSG00000197454	NONHSAT047830.2	0.903388	0.000838745	OR2L5
ENSG00000146410	ENST00000605862	-0.903394	0.000838579	MTFR2
ENSG00000251322	NONHSAT069084.2	0.903397	0.000838472	SHANK3
ENSG00000174564	NONHSAT153055.1	0.903401	0.000838375	IL20RB
ENSG00000171320	NONHSAT213988.1	-0.903405	0.000838234	ESCO2
ENSG00000168806	NONHSAT024251.2	0.903411	0.000838081	LCMT2
ENSG00000213672	NONHSAT042166.2	-0.903417	0.000837882	NCKIPSD
ENSG00000121281	NONHSAT211632.1	-0.903418	0.000837857	ADCY7
ENSG00000119411	NONHSAT135581.2	0.90342	0.000837811	BSPRY
ENSG00000123395	NONHSAT155504.1	-0.903428	0.000837555	ATG101
ENSG00000101638	ENST00000621248	0.903437	0.000837306	ST8SIA5
ENSG00000137135	NONHSAT219745.1	0.90344	0.000837207	ARHGEF39
ENSG00000279765	ENST00000451781	-0.903448	0.000836988	RP11-437B10.1
ENSG00000181634	NONHSAT215705.1	0.903452	0.000836851	TNFSF15
ENSG00000123975	NONHSAT156713.1	0.903457	0.000836718	CKS2
ENSG00000129968	NONHSAT156901.1	-0.903457	0.0008367	ABHD17A
ENSG00000163930	NONHSAT200447.1	0.903466	0.000836435	BAP1
ENSG00000055955	NONHSAT096839.2	-0.90347	0.00083634	ITIH4
ENSG00000129968	NONHSAT005235.2	-0.903474	0.000836209	ABHD17A
ENSG00000184922	NONHSAT194515.1	-0.903478	0.00083609	FMNL1
ENSG00000080986	NONHSAT162123.1	-0.903481	0.000836001	NDC80
ENSG00000100221	ENST00000623851	-0.903481	0.000835998	JOSD1
ENSG00000143228	NONHSAT190914.1	-0.903486	0.000835866	NUF2
ENSG00000147036	NONHSAT175141.1	0.903488	0.000835784	LANCL3
ENSG00000140326	NONHSAT157283.1	0.903491	0.00083571	CDAN1
ENSG00000084092	NONHSAT199551.1	-0.903491	0.000835697	NOA1
ENSG00000189139	NONHSAT149978.1	-0.903501	0.000835405	FSCB
ENSG00000106541	NONHSAT155562.1	0.903508	0.000835218	AGR2
ENSG00000226124	ENST00000596594	0.903508	0.000835199	FTCDNL1
ENSG00000248483	NONHSAT156713.1	-0.903511	0.000835107	POU5F2
ENSG00000268790	ENST00000556657	0.903513	0.000835065	CTC-429P9.4
ENSG00000157456	ENST00000594579	-0.903523	0.000834757	CCNB2
ENSG00000083444	NONHSAT118785.2	0.903525	0.000834702	PLOD1
ENSG00000163507	NONHSAT168677.1	-0.903526	0.000834685	KIAA1524
ENSG00000112769	NONHSAT005235.2	0.903527	0.000834648	LAMA4
ENSG00000075218	NONHSAT135407.2	0.903536	0.000834388	GTSE1
ENSG00000244165	NONHSAT184552.1	0.903544	0.000834141	P2RY11
ENSG00000256861	NONHSAT151649.1	0.903551	0.000833948	RP11-512M8.5
ENSG00000104883	NONHSAT222699.1	0.903552	0.000833923	PEX11G
ENSG00000112149	ENST00000575139	0.903553	0.000833893	CD83
ENSG00000185829	ENST00000506899	0.903555	0.00083382	ARL17A
ENSG00000171097	NONHSAT149381.1	-0.903559	0.000833709	CCBL1
ENSG00000143603	NONHSAT175148.1	0.90356	0.000833683	KCNN3
ENSG00000112769	NONHSAT180590.1	-0.903561	0.000833659	LAMA4
ENSG00000154978	NONHSAT182451.1	-0.903564	0.000833561	VOPP1
ENSG00000187098	ENST00000621248	0.903566	0.000833493	MITF
ENSG00000157833	NONHSAT162123.1	-0.903568	0.000833434	GAREM2
ENSG00000197454	NONHSAT056663.2	0.903569	0.000833421	OR2L5
ENSG00000076382	NONHSAT156713.1	0.903569	0.000833419	SPAG5
ENSG00000181035	NONHSAT190944.1	-0.903578	0.000833155	SLC25A42
ENSG00000144488	ENST00000594579	0.903584	0.000832977	ESPNL
ENSG00000135451	ENST00000606839	-0.903605	0.000832356	TROAP
ENSG00000184828	NONHSAT200243.1	-0.903608	0.000832264	ZBTB7C
ENSG00000188596	NONHSAT168834.1	-0.903612	0.000832143	CFAP54
ENSG00000062038	NONHSAT037576.2	-0.903613	0.000832128	CDH3
ENSG00000275074	NONHSAT156901.1	-0.903617	0.000831999	NUDT18
ENSG00000198959	NONHSAT175141.1	-0.903619	0.000831951	TGM2
ENSG00000160957	NONHSAT151590.1	0.903624	0.000831796	RECQL4
ENSG00000121957	ENST00000530490	0.903626	0.000831748	GPSM2
ENSG00000159111	NONHSAT191017.1	-0.903627	0.000831712	MRPL10
ENSG00000126777	MSTRG.43944.16	0.903629	0.000831643	KTN1
ENSG00000076826	NONHSAT194515.1	-0.903633	0.000831528	CAMSAP3
ENSG00000166912	NONHSAT144680.2	0.903636	0.000831431	MTMR10
ENSG00000167083	ENST00000547021	0.903643	0.000831228	GNGT2
ENSG00000242419	NONHSAT135407.2	-0.903653	0.000830932	PCDHGC4
ENSG00000048140	NONHSAT059018.2	0.903684	0.000830042	TSPAN17
ENSG00000185262	NONHSAT200243.1	-0.903694	0.000829734	UBALD2
ENSG00000108961	NONHSAT156713.1	0.9037	0.000829573	RANGRF
ENSG00000187098	NONHSAT070107.2	-0.903705	0.000829409	MITF
ENSG00000278023	MSTRG.41625.3	0.903707	0.000829356	RDM1
ENSG00000005007	ENST00000620490	-0.903722	0.000828933	UPF1
ENSG00000198763	NONHSAT137546.2	0.90373	0.000828681	MT-ND2
ENSG00000113070	ENST00000594579	0.903734	0.000828584	HBEGF
ENSG00000155729	NONHSAT176670.1	-0.903736	0.000828501	KCTD18
ENSG00000086300	NONHSAT028252.2	0.903742	0.000828328	SNX10
ENSG00000005007	NONHSAT183181.1	0.903746	0.000828212	UPF1
ENSG00000100221	NONHSAT135581.2	0.903758	0.000827876	JOSD1
ENSG00000109674	NONHSAT189891.1	-0.903762	0.000827743	NEIL3
ENSG00000275993	NONHSAT183181.1	0.903769	0.000827532	CH507-42P11.8
ENSG00000123989	NONHSAT194515.1	-0.90378	0.000827211	CHPF
ENSG00000138617	NONHSAT151590.1	0.903783	0.000827144	PARP16
ENSG00000140090	NONHSAT156713.1	0.903798	0.0008267	SLC24A4
ENSG00000183814	NONHSAT180590.1	0.9038	0.000826633	LIN9
ENSG00000165899	NONHSAT175142.1	0.903803	0.00082654	OTOGL
ENSG00000189127	ENST00000594576	-0.903805	0.0008265	ANKRD34B
ENSG00000142632	NONHSAT001153.2	-0.903809	0.000826375	ARHGEF19
ENSG00000144908	ENST00000530490	0.903815	0.000826193	ALDH1L1
ENSG00000146410	NONHSAT135407.2	0.903819	0.000826089	MTFR2
ENSG00000123080	ENST00000506899	-0.903823	0.000825963	CDKN2C
ENSG00000135045	ENST00000506340	0.903834	0.000825632	C9orf40
ENSG00000167535	NONHSAT168677.1	-0.903836	0.000825593	CACNB3
ENSG00000278828	NONHSAT183181.1	0.90384	0.000825455	HIST1H3H
ENSG00000144488	ENST00000606839	0.903851	0.000825149	ESPNL
ENSG00000134202	ENST00000554360	0.903855	0.00082504	GSTM3
ENSG00000171928	NONHSAT017982.2	0.903856	0.000825013	TVP23B
ENSG00000179958	NONHSAT021826.2	0.90386	0.000824876	DCTPP1
ENSG00000156970	ENST00000596594	0.903861	0.000824866	BUB1B
ENSG00000124440	NONHSAT215705.1	0.903866	0.000824706	HIF3A
ENSG00000163507	NONHSAT175141.1	-0.903868	0.000824655	KIAA1524
ENSG00000167553	NONHSAT028252.2	0.90387	0.000824589	TUBA1C
ENSG00000181218	NONHSAT194515.1	-0.903876	0.000824422	HIST3H2A
ENSG00000278828	NONHSAT215705.1	-0.903879	0.000824326	HIST1H3H
ENSG00000212127	NONHSAT017767.2	-0.90388	0.000824299	TAS2R14
ENSG00000154479	NONHSAT212180.1	-0.903881	0.000824272	CCDC173
ENSG00000158467	NONHSAT157731.1	0.903883	0.000824222	AHCYL2
ENSG00000116863	NONHSAT182446.1	-0.903888	0.000824066	ADPRHL2
ENSG00000204941	NONHSAT163874.1	0.903892	0.000823947	PSG5
ENSG00000188763	NONHSAT175141.1	-0.903892	0.000823942	FZD9
ENSG00000080986	NONHSAT032479.2	-0.903898	0.000823771	NDC80
ENSG00000188483	ENST00000603538	0.903902	0.000823655	IER5L
ENSG00000153395	NONHSAT163526.1	-0.903905	0.00082356	LPCAT1
ENSG00000134057	ENST00000506340	0.90392	0.000823142	CCNB1
ENSG00000168874	NONHSAT208349.1	-0.90392	0.000823124	ATOH8
ENSG00000125877	NONHSAT175646.1	0.903924	0.000823019	ITPA
ENSG00000154265	NONHSAT156901.1	0.903928	0.000822899	ABCA5
ENSG00000181035	ENST00000589777	-0.90393	0.00082285	SLC25A42
ENSG00000259571	NONHSAT083319.2	0.903942	0.000822507	BLID
ENSG00000100422	NONHSAT157283.1	0.903946	0.000822369	CERK
ENSG00000121318	ENST00000506899	0.903951	0.000822235	TAS2R10
ENSG00000121318	NONHSAT118785.2	-0.903954	0.000822141	TAS2R10
ENSG00000121957	NONHSAT175141.1	-0.903961	0.000821933	GPSM2
ENSG00000170312	NONHSAT163874.1	-0.903964	0.000821857	CDK1
ENSG00000075218	NONHSAT216432.1	-0.903966	0.000821794	GTSE1
ENSG00000088826	NONHSAT107810.2	0.903971	0.000821647	SMOX
ENSG00000203872	NONHSAT037592.2	-0.903974	0.000821548	C6orf163
ENSG00000197956	NONHSAT157138.1	0.903985	0.000821245	S100A6
ENSG00000169692	NONHSAT194515.1	-0.903987	0.000821194	AGPAT2
ENSG00000111247	NONHSAT028252.2	0.903988	0.000821164	RAD51AP1
ENSG00000185829	NONHSAT211632.1	0.90399	0.000821107	ARL17A
ENSG00000127990	NONHSAT163526.1	-0.904009	0.000820544	SGCE
ENSG00000059122	NONHSAT183181.1	0.90402	0.000820232	FLYWCH1
ENSG00000135315	NONHSAT182446.1	0.904024	0.000820095	CEP162
ENSG00000100242	NONHSAT175148.1	-0.904034	0.000819809	SUN2
ENSG00000151572	ENST00000506899	-0.904041	0.000819604	ANO4
ENSG00000247077	NONHSAT194515.1	-0.904044	0.000819534	PGAM5
ENSG00000124440	NONHSAT135407.2	-0.904046	0.000819466	HIF3A
ENSG00000182809	NONHSAT001153.2	-0.904051	0.000819325	CRIP2
ENSG00000137135	NONHSAT208349.1	-0.904055	0.000819197	ARHGEF39
ENSG00000156509	NONHSAT149381.1	-0.90406	0.000819066	FBXO43
ENSG00000104783	NONHSAT215705.1	-0.904063	0.000818968	KCNN4
ENSG00000168874	NONHSAT220333.1	-0.904063	0.000818967	ATOH8
ENSG00000138778	NONHSAT032479.2	-0.904067	0.000818848	CENPE
ENSG00000258472	NONHSAT118642.2	0.90408	0.000818483	RP11-192H23.4
ENSG00000143603	NONHSAT208349.1	0.904084	0.00081836	KCNN3
ENSG00000157456	NONHSAT182926.1	-0.904085	0.00081833	CCNB2
ENSG00000125968	NONHSAT162123.1	-0.904089	0.000818205	ID1
ENSG00000145919	NONHSAT216957.1	0.90409	0.000818187	BOD1
ENSG00000105287	NONHSAT194515.1	-0.904101	0.000817872	PRKD2
ENSG00000178404	ENST00000603538	-0.904102	0.000817852	CEP295NL
ENSG00000085644	NONHSAT180288.1	-0.904106	0.00081771	ZNF213
ENSG00000188763	NONHSAT005235.2	-0.904115	0.000817466	FZD9
ENSG00000101447	NONHSAT118785.2	0.904125	0.000817169	FAM83D
ENSG00000188760	NONHSAT013107.2	0.904126	0.000817136	TMEM198
ENSG00000166250	ENST00000506899	-0.904145	0.000816584	CLMP
ENSG00000113946	NONHSAT142277.2	0.904146	0.000816572	CLDN16
ENSG00000278828	NONHSAT175141.1	-0.904147	0.000816543	HIST1H3H
ENSG00000215018	ENST00000440574	-0.904148	0.000816517	COL28A1
ENSG00000167723	NONHSAT175141.1	-0.904149	0.000816488	TRPV3
ENSG00000125968	NONHSAT118785.2	0.904167	0.000815967	ID1
ENSG00000196449	NONHSAT151590.1	0.904178	0.000815639	YRDC
ENSG00000140090	NONHSAT162123.1	-0.904184	0.000815471	SLC24A4
ENSG00000171928	NONHSAT091225.2	0.904186	0.000815404	TVP23B
ENSG00000072864	ENST00000440574	0.904192	0.000815219	NDE1
ENSG00000112333	NONHSAT069084.2	0.904192	0.000815218	NR2E1
ENSG00000172780	NONHSAT064321.2	0.904197	0.000815081	RAB43
ENSG00000261611	NONHSAT212543.1	0.904199	0.000815033	AC010547.9
ENSG00000184995	NONHSAT005235.2	0.904214	0.0008146	IFNE
ENSG00000135373	NONHSAT037545.2	0.904221	0.000814378	EHF
ENSG00000091656	NONHSAT219745.1	-0.904223	0.00081434	ZFHX4
ENSG00000162946	ENST00000427953	0.904228	0.000814193	DISC1
ENSG00000109805	ENST00000623851	-0.904231	0.000814089	NCAPG
ENSG00000126903	NONHSAT192574.1	0.904232	0.000814081	SLC10A3
ENSG00000186567	NONHSAT200243.1	0.904233	0.00081404	CEACAM19
ENSG00000159216	NONHSAT176684.1	0.904234	0.000814007	RUNX1
ENSG00000141934	NONHSAT182446.1	-0.904236	0.000813943	PLPP2
ENSG00000171241	NONHSAT171185.1	-0.904238	0.000813906	SHCBP1
ENSG00000154265	NONHSAT200243.1	0.904238	0.00081389	ABCA5
ENSG00000103502	NONHSAT023756.2	-0.904244	0.000813718	CDIPT
ENSG00000143153	ENST00000498304	0.904252	0.000813496	ATP1B1
ENSG00000106789	NONHSAT021826.2	0.904254	0.000813451	CORO2A
ENSG00000149541	NONHSAT190944.1	-0.904262	0.000813201	B3GAT3
ENSG00000116863	NONHSAT215705.1	-0.904264	0.00081316	ADPRHL2
ENSG00000168078	NONHSAT005235.2	-0.904264	0.000813146	PBK
ENSG00000177595	ENST00000498304	-0.904264	0.000813143	PIDD1
ENSG00000137804	ENST00000506340	0.904275	0.000812816	NUSAP1
ENSG00000159069	ENST00000586321	0.904276	0.000812795	FBXW5
ENSG00000071539	NONHSAT193682.1	-0.904279	0.00081271	TRIP13
ENSG00000185361	NONHSAT037592.2	0.904282	0.000812624	TNFAIP8L1
ENSG00000148154	NONHSAT163874.1	0.904285	0.000812527	UGCG
ENSG00000064652	ENST00000585457	0.904285	0.000812527	SNX24
ENSG00000135747	NONHSAT200447.1	0.904286	0.000812512	ZNF670-ZNF695
ENSG00000122863	NONHSAT157283.1	0.904288	0.000812443	CHST3
ENSG00000177508	NONHSAT158445.1	0.904299	0.000812123	IRX3
ENSG00000142945	ENST00000621248	-0.904304	0.000811982	KIF2C
ENSG00000113946	NONHSAT211632.1	0.904309	0.000811853	CLDN16
ENSG00000259571	ENST00000602951	0.904314	0.000811712	BLID
ENSG00000101638	NONHSAT155504.1	0.904316	0.000811653	ST8SIA5
ENSG00000077420	NONHSAT182451.1	0.904327	0.000811332	APBB1IP
ENSG00000137804	NONHSAT037545.2	-0.904332	0.000811184	NUSAP1
ENSG00000095383	ENST00000623851	-0.904337	0.000811034	TBC1D2
ENSG00000100242	NONHSAT213988.1	-0.904342	0.000810901	SUN2
ENSG00000109016	NONHSAT180590.1	0.904346	0.000810777	DHRS7B
ENSG00000100626	ENST00000586657	0.904351	0.000810643	GALNT16
ENSG00000072071	ENST00000537869	0.904351	0.000810629	ADGRL1
ENSG00000100221	NONHSAT183181.1	0.904363	0.000810284	JOSD1
ENSG00000174564	ENST00000506340	-0.90437	0.000810077	IL20RB
ENSG00000154265	NONHSAT216432.1	0.904382	0.000809749	ABCA5
ENSG00000127870	NONHSAT165541.1	0.904385	0.000809663	RNF6
ENSG00000231924	MSTRG.44668.2	0.904393	0.000809426	PSG1
ENSG00000185361	NONHSAT156713.1	0.904396	0.000809337	TNFAIP8L1
ENSG00000248483	NONHSAT221000.1	0.904398	0.000809293	POU5F2
ENSG00000081842	NONHSAT144554.2	0.904399	0.000809249	PCDHA6
ENSG00000090889	NONHSAT028252.2	0.904423	0.000808549	KIF4A
ENSG00000170270	NONHSAT107810.2	0.904428	0.000808414	C14orf142
ENSG00000162817	NONHSAT215705.1	0.904434	0.000808243	C1orf115
ENSG00000113163	NONHSAT171185.1	0.904436	0.000808179	COL4A3BP
ENSG00000143153	NONHSAT168803.1	0.904438	0.00080814	ATP1B1
ENSG00000159111	NONHSAT200572.1	-0.90444	0.000808085	MRPL10
ENSG00000121775	NONHSAT042166.2	-0.904443	0.000807987	TMEM39B
ENSG00000181143	NONHSAT042166.2	0.90445	0.000807773	MUC16
ENSG00000146410	NONHSAT156713.1	0.904459	0.000807516	MTFR2
ENSG00000100030	ENST00000603538	0.904467	0.000807295	MAPK1
ENSG00000158402	NONHSAT215706.1	0.904479	0.000806952	CDC25C
ENSG00000106003	NONHSAT042166.2	-0.904489	0.000806664	LFNG
ENSG00000185033	NONHSAT042166.2	-0.904503	0.000806266	SEMA4B
ENSG00000100422	NONHSAT135581.2	0.904532	0.000805413	CERK
ENSG00000123159	NONHSAT162123.1	-0.904539	0.000805216	GIPC1
ENSG00000171222	NONHSAT182446.1	-0.904543	0.000805108	SCAND1
ENSG00000134202	NONHSAT032479.2	0.90455	0.000804922	GSTM3
ENSG00000150625	NONHSAT135391.2	-0.904552	0.000804844	GPM6A
ENSG00000168078	ENST00000498304	-0.904558	0.000804686	PBK
ENSG00000064652	NONHSAT213072.1	0.904558	0.000804677	SNX24
ENSG00000134057	NONHSAT151590.1	0.904569	0.000804366	CCNB1
ENSG00000113763	NONHSAT135581.2	0.90457	0.000804328	UNC5A
ENSG00000160803	ENST00000621248	-0.904578	0.000804092	UBQLN4
ENSG00000107872	NONHSAT190944.1	-0.904589	0.000803785	FBXL15
ENSG00000187607	ENST00000457958	0.904593	0.000803669	ZNF286A
ENSG00000035499	NONHSAT183181.1	0.904609	0.000803222	DEPDC1B
ENSG00000183814	NONHSAT158445.1	0.904613	0.00080311	LIN9
ENSG00000085644	NONHSAT215705.1	-0.904624	0.000802788	ZNF213
ENSG00000180777	NONHSAT200243.1	0.904625	0.000802759	ANKRD30B
ENSG00000251322	NONHSAT118785.2	0.904628	0.000802667	SHANK3
ENSG00000185909	ENST00000579050	0.904633	0.00080254	KLHDC8B
ENSG00000024526	NONHSAT182926.1	-0.904635	0.000802462	DEPDC1
ENSG00000051009	NONHSAT156713.1	0.904636	0.000802446	FAM160A2
ENSG00000278677	NONHSAT107810.2	0.904644	0.000802208	HIST1H2AM
ENSG00000153714	NONHSAT135407.2	-0.90465	0.000802038	LURAP1L
ENSG00000165899	NONHSAT155504.1	0.904656	0.000801883	OTOGL
ENSG00000101997	NONHSAT211632.1	-0.904658	0.000801811	CCDC22
ENSG00000183856	NONHSAT194515.1	-0.904662	0.000801687	IQGAP3
ENSG00000161682	ENST00000623851	-0.904664	0.000801635	FAM171A2
ENSG00000160298	ENST00000621248	-0.904674	0.000801353	C21orf58
ENSG00000069943	NONHSAT037576.2	0.904677	0.000801271	PIGB
ENSG00000106789	ENST00000530490	0.90468	0.000801183	CORO2A
ENSG00000165731	NONHSAT042166.2	-0.904683	0.000801095	RET
ENSG00000051341	NONHSAT163874.1	-0.904683	0.000801091	POLQ
ENSG00000159111	NONHSAT089638.2	-0.904686	0.000800999	MRPL10
ENSG00000138617	NONHSAT194515.1	-0.904689	0.000800929	PARP16
ENSG00000179134	NONHSAT107810.2	0.904702	0.000800567	SAMD4B
ENSG00000115234	NONHSAT023756.2	-0.904714	0.000800202	SNX17
ENSG00000166912	ENST00000505133	0.904717	0.000800127	MTMR10
ENSG00000185480	NONHSAT156901.1	-0.90472	0.000800049	PARPBP
ENSG00000107882	NONHSAT001153.2	-0.904722	0.000799989	SUFU
ENSG00000099822	NONHSAT211632.1	-0.904726	0.00079988	HCN2
ENSG00000108106	NONHSAT188701.1	0.904729	0.000799792	UBE2S
ENSG00000159111	MSTRG.43922.10	-0.904732	0.000799706	MRPL10
ENSG00000174776	NONHSAT200243.1	0.904732	0.000799686	WDR49
ENSG00000159111	MSTRG.43922.15	-0.904736	0.00079957	MRPL10
ENSG00000127990	NONHSAT028252.2	-0.904741	0.000799428	SGCE
ENSG00000113163	NONHSAT198315.1	0.904748	0.000799229	COL4A3BP
ENSG00000143858	MSTRG.43944.16	0.904749	0.000799202	SYT2
ENSG00000163362	NONHSAT058970.2	-0.904754	0.00079908	C1orf106
ENSG00000121318	NONHSAT175141.1	0.904755	0.000799029	TAS2R10
ENSG00000103260	NONHSAT070107.2	0.904757	0.000798977	METRN
ENSG00000116329	NONHSAT095594.2	-0.904757	0.000798977	OPRD1
ENSG00000164611	ENST00000440574	0.904758	0.000798951	PTTG1
ENSG00000159111	NONHSAT191015.1	-0.904766	0.000798733	MRPL10
ENSG00000075218	NONHSAT182451.1	-0.904767	0.000798697	GTSE1
ENSG00000103507	NONHSAT027870.2	-0.904773	0.000798529	BCKDK
ENSG00000235106	NONHSAT156713.1	0.904774	0.0007985	LINC00094
ENSG00000117411	NONHSAT182446.1	-0.90478	0.000798322	B4GALT2
ENSG00000146918	NONHSAT180590.1	0.904797	0.000797847	NCAPG2
ENSG00000103502	NONHSAT180414.1	-0.904802	0.000797697	CDIPT
ENSG00000187634	NONHSAT180590.1	0.904809	0.000797485	SAMD11
ENSG00000072071	NONHSAT118785.2	0.904811	0.000797455	ADGRL1
ENSG00000011426	ENST00000594579	-0.904818	0.000797254	ANLN
ENSG00000175216	NONHSAT215705.1	-0.904821	0.000797162	CKAP5
ENSG00000159111	ENST00000609303	-0.904843	0.000796536	MRPL10
ENSG00000171320	NONHSAT188701.1	0.904845	0.000796468	ESCO2
ENSG00000159111	NONHSAT001153.2	-0.904852	0.000796262	MRPL10
ENSG00000105810	NONHSAT037592.2	-0.904855	0.000796199	CDK6
ENSG00000197119	NONHSAT149591.1	0.904859	0.00079607	SLC25A29
ENSG00000143228	NONHSAT171185.1	-0.904864	0.000795927	NUF2
ENSG00000157456	NONHSAT149381.1	-0.904868	0.000795807	CCNB2
ENSG00000196890	NONHSAT144680.2	-0.904871	0.000795734	HIST3H2BB
ENSG00000197122	ENST00000530490	0.904873	0.000795675	SRC
ENSG00000091656	NONHSAT168803.1	0.904884	0.000795356	ZFHX4
ENSG00000124507	NONHSAT047830.2	0.904884	0.000795351	PACSIN1
ENSG00000105376	NONHSAT155504.1	-0.904912	0.000794561	ICAM5
ENSG00000186976	NONHSAT175148.1	0.904925	0.000794186	EFCAB6
ENSG00000184357	NONHSAT118785.2	0.904938	0.000793838	HIST1H1B
ENSG00000138778	NONHSAT193682.1	-0.904941	0.000793746	CENPE
ENSG00000272196	NONHSAT216432.1	-0.904945	0.000793639	HIST2H2AA4
ENSG00000150625	NONHSAT200243.1	0.904945	0.000793637	GPM6A
ENSG00000146670	NONHSAT216957.1	0.904949	0.000793522	CDCA5
ENSG00000166912	ENST00000621248	0.904957	0.000793299	MTMR10
ENSG00000140988	ENST00000545688	0.904957	0.000793286	RPS2
ENSG00000188763	ENST00000506899	-0.904962	0.00079315	FZD9
ENSG00000135451	ENST00000427953	-0.904962	0.000793134	TROAP
ENSG00000104131	ENST00000495723	0.904971	0.000792887	EIF3J
ENSG00000100629	NONHSAT118642.2	0.904992	0.000792281	CEP128
ENSG00000187778	NONHSAT180590.1	0.904996	0.000792175	MCRS1
ENSG00000164087	NONHSAT151590.1	0.905009	0.0007918	POC1A
ENSG00000137804	NONHSAT208300.1	-0.905013	0.000791704	NUSAP1
ENSG00000189139	NONHSAT163874.1	0.905024	0.000791389	FSCB
ENSG00000162526	NONHSAT119833.2	0.905028	0.00079128	TSSK3
ENSG00000187778	NONHSAT135581.2	0.905029	0.000791254	MCRS1
ENSG00000106009	NONHSAT194515.1	-0.905039	0.000790952	BRAT1
ENSG00000153714	NONHSAT163874.1	0.905041	0.000790888	LURAP1L
ENSG00000035499	NONHSAT216432.1	-0.905043	0.000790852	DEPDC1B
ENSG00000183856	NONHSAT157283.1	0.905044	0.000790823	IQGAP3
ENSG00000188522	NONHSAT163499.1	-0.90505	0.000790647	FAM83G
ENSG00000146918	ENST00000530490	0.905073	0.000790001	NCAPG2
ENSG00000091656	ENST00000502693	-0.905073	0.000789981	ZFHX4
ENSG00000186665	ENST00000623851	-0.905078	0.000789865	C17orf58
ENSG00000002586	ENST00000612725	-0.905079	0.000789833	CD99
ENSG00000268193	NONHSAT163499.1	0.905088	0.00078957	AC002985.3
ENSG00000136560	NONHSAT182446.1	0.905089	0.000789543	TANK
ENSG00000134202	NONHSAT158445.1	-0.90509	0.00078951	GSTM3
ENSG00000071539	ENST00000537869	0.905095	0.000789385	TRIP13
ENSG00000171320	NONHSAT182926.1	-0.905098	0.000789288	ESCO2
ENSG00000149782	NONHSAT171185.1	-0.905114	0.000788839	PLCB3
ENSG00000171314	NONHSAT069084.2	0.905129	0.000788402	PGAM1
ENSG00000113946	NONHSAT037592.2	-0.905139	0.000788131	CLDN16
ENSG00000133773	NONHSAT194515.1	0.905153	0.00078772	CCDC59
ENSG00000143153	NONHSAT037545.2	0.905154	0.000787689	ATP1B1
ENSG00000111247	NONHSAT183370.1	0.905155	0.00078768	RAD51AP1
ENSG00000151611	NONHSAT119833.2	-0.905158	0.000787595	MMAA
ENSG00000171222	NONHSAT135581.2	0.905158	0.000787584	SCAND1
ENSG00000172824	NONHSAT198315.1	0.905159	0.000787559	CES4A
ENSG00000122863	NONHSAT175141.1	-0.905161	0.000787508	CHST3
ENSG00000167900	NONHSAT156713.1	0.905165	0.000787399	TK1
ENSG00000010256	NONHSAT042166.2	-0.905184	0.00078685	UQCRC1
ENSG00000112149	NONHSAT100694.2	0.905185	0.000786836	CD83
ENSG00000185361	NONHSAT070107.2	0.905185	0.000786831	TNFAIP8L1
ENSG00000124440	NONHSAT142277.2	0.905196	0.000786505	HIF3A
ENSG00000276203	NONHSAT182926.1	0.905199	0.000786439	ANKRD20A3
ENSG00000169607	NONHSAT144680.2	-0.905201	0.000786371	CKAP2L
ENSG00000154479	NONHSAT175148.1	0.905215	0.000785982	CCDC173
ENSG00000143153	NONHSAT180590.1	-0.905218	0.000785895	ATP1B1
ENSG00000161800	NONHSAT175148.1	-0.905219	0.000785869	RACGAP1
ENSG00000146410	NONHSAT208300.1	-0.905222	0.000785776	MTFR2
ENSG00000135314	NONHSAT064321.2	0.905223	0.000785747	KHDC1
ENSG00000149782	NONHSAT156713.1	0.905233	0.000785478	PLCB3
ENSG00000135480	NONHSAT163526.1	0.905234	0.000785435	KRT7
ENSG00000100097	NONHSAT144680.2	-0.905241	0.000785235	LGALS1
ENSG00000105755	NONHSAT156713.1	0.905254	0.000784868	ETHE1
ENSG00000278677	ENST00000429962	0.905257	0.000784788	HIST1H2AM
ENSG00000213995	ENST00000505133	-0.90526	0.000784705	CARKD
ENSG00000002586	ENST00000610009	-0.905265	0.000784568	CD99
ENSG00000158467	NONHSAT142274.2	0.905268	0.000784496	AHCYL2
ENSG00000139209	ENST00000586657	-0.905271	0.000784395	SLC38A4
ENSG00000178404	NONHSAT182446.1	0.905273	0.000784352	CEP295NL
ENSG00000134308	ENST00000623851	-0.905274	0.000784308	YWHAQ
ENSG00000158467	ENST00000508913	0.905274	0.0007843	AHCYL2
ENSG00000179564	NONHSAT163499.1	0.905285	0.000784002	LSMEM2
ENSG00000142235	NONHSAT203396.1	-0.905287	0.000783946	LMTK3
ENSG00000105821	ENST00000623851	0.905287	0.000783934	DNAJC2
ENSG00000100626	NONHSAT216432.1	-0.905288	0.000783927	GALNT16
ENSG00000107882	NONHSAT157283.1	0.905289	0.000783889	SUFU
ENSG00000182263	NONHSAT190914.1	0.905291	0.000783826	FIGN
ENSG00000081842	NONHSAT017852.2	0.905298	0.000783628	PCDHA6
ENSG00000059122	ENST00000537869	0.905301	0.000783552	FLYWCH1
ENSG00000135315	NONHSAT135407.2	-0.905304	0.000783477	CEP162
ENSG00000137135	ENST00000505133	-0.905304	0.00078347	ARHGEF39
ENSG00000123395	NONHSAT175142.1	-0.905308	0.000783352	ATG101
ENSG00000188542	NONHSAT001153.2	-0.905317	0.000783092	DUSP28
ENSG00000117399	NONHSAT099658.2	-0.905322	0.000782952	CDC20
ENSG00000100221	NONHSAT151590.1	0.905328	0.000782797	JOSD1
ENSG00000166189	NONHSAT149591.1	0.905331	0.000782713	HPS6
ENSG00000104660	NONHSAT211819.1	0.905334	0.000782636	LEPROTL1
ENSG00000176945	NONHSAT180288.1	0.905341	0.000782428	MUC20
ENSG00000168209	NONHSAT163874.1	-0.905351	0.000782154	DDIT4
ENSG00000272196	NONHSAT180590.1	0.905358	0.000781956	HIST2H2AA4
ENSG00000140995	NONHSAT156713.1	0.905372	0.000781566	DEF8
ENSG00000108106	NONHSAT037592.2	0.905372	0.000781558	UBE2S
ENSG00000167900	ENST00000621248	-0.90538	0.000781338	TK1
ENSG00000168078	ENST00000594576	0.905384	0.000781203	PBK
ENSG00000138271	NONHSAT142277.2	0.905387	0.000781125	GPR87
ENSG00000162735	ENST00000622268	0.905397	0.000780857	PEX19
ENSG00000113163	NONHSAT175148.1	0.905411	0.000780445	COL4A3BP
ENSG00000113391	NONHSAT175142.1	0.905414	0.000780372	FAM172A
ENSG00000164362	NONHSAT195963.1	0.905414	0.000780366	TERT
ENSG00000104059	NONHSAT215705.1	-0.905431	0.000779903	FAM189A1
ENSG00000156509	ENST00000621248	-0.905444	0.000779542	FBXO43
ENSG00000203812	NONHSAT182459.1	-0.905445	0.000779495	HIST2H2AA3
ENSG00000166189	NONHSAT182446.1	-0.905449	0.000779396	HPS6
ENSG00000124143	NONHSAT191017.1	0.905452	0.000779302	ARHGAP40
ENSG00000144488	NONHSAT219745.1	-0.905453	0.000779278	ESPNL
ENSG00000145741	NONHSAT198315.1	0.905456	0.000779203	BTF3
ENSG00000135333	NONHSAT135407.2	-0.905457	0.000779158	EPHA7
ENSG00000213799	ENST00000547364	0.905473	0.000778712	ZNF845
ENSG00000183856	NONHSAT162123.1	-0.905484	0.000778418	IQGAP3
ENSG00000163870	NONHSAT163952.1	0.905484	0.000778398	TPRA1
ENSG00000133961	ENST00000545631	-0.90549	0.000778227	NUMB
ENSG00000215784	NONHSAT182451.1	-0.905503	0.00077787	FAM72D
ENSG00000215018	ENST00000621248	0.905504	0.000777843	COL28A1
ENSG00000117724	NONHSAT144680.2	-0.905511	0.000777643	CENPF
ENSG00000134202	NONHSAT192024.1	-0.905513	0.000777592	GSTM3
ENSG00000116863	NONHSAT162255.1	0.905516	0.000777524	ADPRHL2
ENSG00000146670	NONHSAT162123.1	-0.905516	0.000777501	CDCA5
ENSG00000171241	NONHSAT212180.1	0.905526	0.000777224	SHCBP1
ENSG00000140534	NONHSAT175141.1	-0.905544	0.00077674	TICRR
ENSG00000114346	ENST00000453698	0.905545	0.000776708	ECT2
ENSG00000149930	ENST00000537869	0.905545	0.000776696	TAOK2
ENSG00000175352	NONHSAT168677.1	-0.905549	0.000776587	NRIP3
ENSG00000168702	NONHSAT175141.1	0.905566	0.000776099	LRP1B
ENSG00000183098	NONHSAT042166.2	-0.905569	0.000776035	GPC6
ENSG00000140995	NONHSAT163526.1	0.90557	0.000775994	DEF8
ENSG00000165731	NONHSAT163526.1	0.905571	0.000775962	RET
ENSG00000099625	NONHSAT135581.2	0.905576	0.000775846	CBARP
ENSG00000134222	ENST00000449500	0.905576	0.00077584	PSRC1
ENSG00000035499	NONHSAT193682.1	-0.905576	0.000775829	DEPDC1B
ENSG00000185480	NONHSAT188701.1	0.905578	0.00077579	PARPBP
ENSG00000174236	NONHSAT158445.1	-0.905582	0.000775652	REP15
ENSG00000215421	NONHSAT162255.1	-0.905591	0.000775402	ZNF407
ENSG00000144488	NONHSAT037592.2	-0.905596	0.000775283	ESPNL
ENSG00000145214	ENST00000594576	0.905604	0.000775038	DGKQ
ENSG00000181634	NONHSAT099658.2	0.905606	0.000775001	TNFSF15
ENSG00000083444	ENST00000449500	0.905607	0.000774973	PLOD1
ENSG00000147036	NONHSAT182446.1	0.905612	0.000774826	LANCL3
ENSG00000125731	ENST00000552778	-0.905621	0.000774578	SH2D3A
ENSG00000277791	NONHSAT207200.1	0.905622	0.00077456	PSMB3
ENSG00000152253	NONHSAT072537.2	0.905622	0.000774532	SPC25
ENSG00000134308	NONHSAT200447.1	0.905623	0.000774513	YWHAQ
ENSG00000143776	NONHSAT184726.1	-0.905628	0.000774376	CDC42BPA
ENSG00000072864	NONHSAT142274.2	0.905634	0.000774217	NDE1
ENSG00000160957	NONHSAT107810.2	0.905636	0.000774167	RECQL4
ENSG00000142632	NONHSAT131099.2	-0.90565	0.000773754	ARHGEF19
ENSG00000105376	ENST00000506899	-0.905652	0.000773718	ICAM5
ENSG00000171222	NONHSAT163874.1	-0.905661	0.000773458	SCAND1
ENSG00000176046	NONHSAT163952.1	-0.905669	0.000773229	NUPR1
ENSG00000166965	NONHSAT072537.2	0.905684	0.000772811	RCCD1
ENSG00000167535	NONHSAT193897.1	-0.905695	0.0007725	CACNB3
ENSG00000173456	ENST00000623851	-0.905699	0.000772391	RNF26
ENSG00000113070	NONHSAT168803.1	0.905703	0.000772285	HBEGF
ENSG00000173020	NONHSAT190944.1	-0.905704	0.000772249	ADRBK1
ENSG00000185187	ENST00000594576	0.905705	0.000772226	SIGIRR
ENSG00000105287	NONHSAT155504.1	-0.905713	0.00077202	PRKD2
ENSG00000278828	NONHSAT182446.1	-0.905713	0.000772011	HIST1H3H
ENSG00000117724	NONHSAT155504.1	-0.90572	0.000771822	CENPF
ENSG00000160753	NONHSAT211632.1	-0.905722	0.000771748	RUSC1
ENSG00000140988	NONHSAT185911.1	0.90573	0.000771539	RPS2
ENSG00000123411	NONHSAT213988.1	-0.90573	0.000771532	IKZF4
ENSG00000123136	NONHSAT211632.1	-0.905739	0.000771276	DDX39A
ENSG00000142632	NONHSAT180590.1	0.905739	0.000771276	ARHGEF19
ENSG00000108262	NONHSAT180590.1	0.905741	0.000771216	GIT1
ENSG00000077463	ENST00000621248	-0.905747	0.000771063	SIRT6
ENSG00000081842	NONHSAT185510.1	0.905748	0.000771019	PCDHA6
ENSG00000186567	NONHSAT182451.1	0.905758	0.000770757	CEACAM19
ENSG00000077420	NONHSAT182446.1	0.905773	0.000770342	APBB1IP
ENSG00000116691	NONHSAT195963.1	0.905778	0.000770207	MIIP
ENSG00000182054	ENST00000596594	0.905792	0.000769819	IDH2
ENSG00000129932	NONHSAT180590.1	0.905798	0.000769643	DOHH
ENSG00000147036	ENST00000623851	0.905801	0.000769544	LANCL3
ENSG00000197122	NONHSAT182446.1	-0.905805	0.000769438	SRC
ENSG00000259571	NONHSAT091225.2	0.905817	0.000769111	BLID
ENSG00000167723	NONHSAT215705.1	-0.90583	0.000768758	TRPV3
ENSG00000011007	NONHSAT168677.1	-0.905838	0.000768528	TCEB3
ENSG00000167110	NONHSAT059018.2	-0.905846	0.000768296	GOLGA2
ENSG00000113070	NONHSAT107810.2	-0.905849	0.000768216	HBEGF
ENSG00000183578	NONHSAT142277.2	-0.90585	0.000768204	TNFAIP8L3
ENSG00000129968	NONHSAT161350.1	-0.905851	0.000768164	ABHD17A
ENSG00000145337	ENST00000603538	0.905852	0.000768131	PYURF
ENSG00000140451	ENST00000451781	0.905857	0.000768009	PIF1
ENSG00000203872	NONHSAT157283.1	-0.905858	0.000767981	C6orf163
ENSG00000163870	NONHSAT163874.1	-0.90586	0.000767925	TPRA1
ENSG00000259571	NONHSAT168803.1	0.905865	0.000767779	BLID
ENSG00000175520	ENST00000429104	-0.905882	0.000767301	UBQLN3
ENSG00000164109	NONHSAT118785.2	0.90589	0.000767091	MAD2L1
ENSG00000117650	NONHSAT180590.1	0.905893	0.000766993	NEK2
ENSG00000145919	NONHSAT200447.1	0.905894	0.000766978	BOD1
ENSG00000169692	NONHSAT156713.1	0.905895	0.000766941	AGPAT2
ENSG00000187753	NONHSAT222699.1	-0.9059	0.000766808	C9orf153
ENSG00000113389	NONHSAT064321.2	0.9059	0.000766801	NPR3
ENSG00000171320	NONHSAT219745.1	0.905902	0.00076674	ESCO2
ENSG00000163157	NONHSAT180412.1	0.905904	0.000766696	TMOD4
ENSG00000011426	NONHSAT163874.1	-0.905911	0.000766499	ANLN
ENSG00000161996	NONHSAT183181.1	0.905923	0.00076617	WDR90
ENSG00000142178	NONHSAT037592.2	0.905923	0.00076617	SIK1
ENSG00000183856	NONHSAT161350.1	-0.905953	0.000765327	IQGAP3
ENSG00000102996	NONHSAT193682.1	-0.905954	0.000765319	MMP15
ENSG00000081842	NONHSAT090444.2	0.905959	0.000765158	PCDHA6
ENSG00000081842	NONHSAT026976.2	0.90596	0.000765127	PCDHA6
ENSG00000179564	NONHSAT157283.1	-0.905968	0.000764916	LSMEM2
ENSG00000104059	NONHSAT198315.1	-0.905977	0.000764669	FAM189A1
ENSG00000083444	NONHSAT175142.1	-0.905982	0.000764537	PLOD1
ENSG00000064652	NONHSAT122447.2	0.905986	0.000764421	SNX24
ENSG00000138433	ENST00000620617	-0.90599	0.000764322	CIR1
ENSG00000174776	NONHSAT182459.1	0.905993	0.000764237	WDR49
ENSG00000140534	NONHSAT032479.2	-0.905997	0.000764122	TICRR
ENSG00000169972	NONHSAT195963.1	0.906008	0.000763814	PUSL1
ENSG00000081842	NONHSAT155607.1	0.906017	0.000763554	PCDHA6
ENSG00000169926	ENST00000506899	-0.90602	0.000763489	KLF13
ENSG00000172059	NONHSAT151590.1	0.906028	0.000763258	KLF11
ENSG00000154479	NONHSAT161350.1	0.906034	0.000763104	CCDC173
ENSG00000149782	NONHSAT151590.1	0.906037	0.000763003	PLCB3
ENSG00000129968	NONHSAT149978.1	0.90604	0.000762929	ABHD17A
ENSG00000183763	NONHSAT107810.2	0.906057	0.000762469	TRAIP
ENSG00000185262	NONHSAT001153.2	-0.906059	0.000762403	UBALD2
ENSG00000064652	NONHSAT083184.2	0.906074	0.000761988	SNX24
ENSG00000135631	ENST00000585279	0.906076	0.000761922	RAB11FIP5
ENSG00000113391	NONHSAT163874.1	0.906077	0.000761896	FAM172A
ENSG00000134107	NONHSAT163526.1	0.906085	0.000761695	BHLHE40
ENSG00000113163	NONHSAT070107.2	-0.906086	0.000761658	COL4A3BP
ENSG00000100321	NONHSAT195963.1	0.906088	0.000761601	SYNGR1
ENSG00000155729	NONHSAT149070.1	-0.90609	0.000761534	KCTD18
ENSG00000186976	NONHSAT220333.1	0.906093	0.000761457	EFCAB6
ENSG00000064652	NONHSAT179316.1	0.906094	0.000761439	SNX24
ENSG00000186976	NONHSAT176684.1	0.906097	0.000761339	EFCAB6
ENSG00000184207	NONHSAT190944.1	-0.906101	0.000761241	PGP
ENSG00000140534	NONHSAT156901.1	-0.906106	0.000761102	TICRR
ENSG00000132031	ENST00000498304	-0.906118	0.000760769	MATN3
ENSG00000147036	NONHSAT156901.1	0.906121	0.000760696	LANCL3
ENSG00000169679	ENST00000621248	-0.906127	0.000760521	BUB1
ENSG00000185261	ENST00000620490	0.906132	0.000760372	KIAA0825
ENSG00000117399	NONHSAT135407.2	0.906133	0.000760366	CDC20
ENSG00000155090	ENST00000545688	0.906133	0.00076036	KLF10
ENSG00000112149	NONHSAT072537.2	0.906159	0.000759652	CD83
ENSG00000163507	NONHSAT163499.1	-0.906166	0.000759452	KIAA1524
ENSG00000203814	NONHSAT119833.2	0.906175	0.000759192	HIST2H2BF
ENSG00000064652	NONHSAT025395.2	0.906175	0.000759191	SNX24
ENSG00000069943	ENST00000475371	0.906186	0.000758903	PIGB
ENSG00000149541	NONHSAT163499.1	-0.906187	0.000758873	B3GAT3
ENSG00000177427	ENST00000528660	0.90619	0.00075878	MIEF2
ENSG00000083520	NONHSAT175142.1	0.906194	0.000758673	DIS3
ENSG00000169607	NONHSAT156901.1	-0.906196	0.000758621	CKAP2L
ENSG00000075407	ENST00000438689	0.9062	0.000758503	ZNF37A
ENSG00000169607	NONHSAT183370.1	0.906202	0.000758468	CKAP2L
ENSG00000069696	NONHSAT194515.1	-0.906213	0.000758156	DRD4
ENSG00000248710	NONHSAT175647.1	0.906214	0.000758138	RP11-432B6.3
ENSG00000184357	NONHSAT163874.1	-0.906214	0.000758123	HIST1H1B
ENSG00000166803	ENST00000440574	0.906219	0.000757981	KIAA0101
ENSG00000138778	NONHSAT182459.1	-0.906224	0.000757845	CENPE
ENSG00000143603	NONHSAT163910.1	-0.906229	0.00075772	KCNN3
ENSG00000131653	ENST00000589777	-0.906252	0.000757085	TRAF7
ENSG00000076826	NONHSAT163874.1	-0.906263	0.00075679	CAMSAP3
ENSG00000104147	NONHSAT200243.1	-0.90627	0.000756579	OIP5
ENSG00000139618	NONHSAT118802.2	0.906274	0.000756477	BRCA2
ENSG00000172824	NONHSAT149381.1	0.906286	0.000756157	CES4A
ENSG00000165899	NONHSAT180414.1	0.906295	0.000755897	OTOGL
ENSG00000171462	ENST00000594576	0.906298	0.000755824	DLK2
ENSG00000100629	NONHSAT119833.2	0.906301	0.00075573	CEP128
ENSG00000103260	NONHSAT149978.1	0.906302	0.000755701	METRN
ENSG00000189127	ENST00000555518	-0.906308	0.000755553	ANKRD34B
ENSG00000256861	NONHSAT158445.1	-0.906309	0.000755519	RP11-512M8.5
ENSG00000187753	NONHSAT163952.1	-0.906313	0.000755392	C9orf153
ENSG00000198959	NONHSAT118642.2	0.906315	0.000755352	TGM2
ENSG00000100422	NONHSAT069084.2	0.906318	0.000755259	CERK
ENSG00000197122	NONHSAT155504.1	-0.906322	0.000755165	SRC
ENSG00000112769	NONHSAT158445.1	-0.906327	0.000755021	LAMA4
ENSG00000213760	ENST00000621997	0.906344	0.000754564	ATP6V1G2
ENSG00000247077	NONHSAT180590.1	0.90635	0.000754375	PGAM5
ENSG00000268447	NONHSAT175142.1	0.906374	0.000753721	SSX2B
ENSG00000147036	NONHSAT027870.2	0.906381	0.000753532	LANCL3
ENSG00000134057	NONHSAT149381.1	-0.906384	0.000753468	CCNB1
ENSG00000146410	ENST00000429104	0.906386	0.000753411	MTFR2
ENSG00000158470	NONHSAT005235.2	0.906389	0.000753331	B4GALT5
ENSG00000165804	NONHSAT215706.1	0.906389	0.000753319	ZNF219
ENSG00000168454	ENST00000623851	0.906391	0.000753276	TXNDC2
ENSG00000278463	ENST00000475371	0.9064	0.000753008	HIST1H2AB
ENSG00000112333	ENST00000530490	0.906407	0.000752825	NR2E1
ENSG00000187266	NONHSAT180590.1	0.90641	0.000752752	EPOR
ENSG00000102189	NONHSAT156145.1	0.906418	0.000752524	EEA1
ENSG00000145337	ENST00000537869	0.90642	0.000752473	PYURF
ENSG00000135315	NONHSAT176684.1	0.906425	0.000752344	CEP162
ENSG00000244165	NONHSAT192035.1	0.906428	0.000752238	P2RY11
ENSG00000175216	ENST00000506340	0.906434	0.000752074	CKAP5
ENSG00000154485	ENST00000586657	-0.906439	0.000751949	MMP21
ENSG00000278828	NONHSAT162255.1	0.906441	0.000751898	HIST1H3H
ENSG00000196705	ENST00000427953	0.906449	0.000751688	ZNF431
ENSG00000135333	NONHSAT142277.2	0.906454	0.000751535	EPHA7
ENSG00000132026	NONHSAT190914.1	-0.906474	0.000750993	RTBDN
ENSG00000004399	NONHSAT208349.1	-0.906478	0.000750873	PLXND1
ENSG00000151611	NONHSAT149978.1	-0.906483	0.000750742	MMAA
ENSG00000275993	NONHSAT158445.1	0.906485	0.000750679	CH507-42P11.8
ENSG00000173559	NONHSAT168803.1	0.906495	0.000750408	NABP1
ENSG00000171320	NONHSAT190914.1	-0.906504	0.000750161	ESCO2
ENSG00000154265	NONHSAT163526.1	-0.906525	0.000749601	ABCA5
ENSG00000215784	NONHSAT156713.1	0.906533	0.000749375	FAM72D
ENSG00000145386	ENST00000552778	-0.906539	0.000749203	CCNA2
ENSG00000103502	NONHSAT163499.1	-0.906572	0.000748317	CDIPT
ENSG00000171462	NONHSAT222699.1	0.906574	0.000748261	DLK2
ENSG00000124507	NONHSAT155562.1	0.906587	0.000747902	PACSIN1
ENSG00000134222	ENST00000591069	0.906587	0.000747893	PSRC1
ENSG00000107882	NONHSAT118785.2	0.906599	0.000747576	SUFU
ENSG00000182809	NONHSAT180414.1	-0.906601	0.000747534	CRIP2
ENSG00000179314	ENST00000498967	0.906602	0.00074751	WSCD1
ENSG00000175520	ENST00000555518	-0.906605	0.000747407	UBQLN3
ENSG00000171241	NONHSAT213988.1	-0.906617	0.000747095	SHCBP1
ENSG00000212127	NONHSAT193682.1	0.906621	0.000746979	TAS2R14
ENSG00000204941	NONHSAT193682.1	0.906621	0.000746976	PSG5
ENSG00000159111	NONHSAT075364.2	-0.906623	0.000746918	MRPL10
ENSG00000071539	NONHSAT005235.2	-0.906631	0.000746704	TRIP13
ENSG00000185085	NONHSAT215706.1	0.906637	0.000746548	INTS5
ENSG00000105376	NONHSAT188701.1	0.906639	0.000746496	ICAM5
ENSG00000100221	NONHSAT156713.1	0.90664	0.000746454	JOSD1
ENSG00000054116	NONHSAT215706.1	0.906642	0.000746396	TRAPPC3
ENSG00000178404	ENST00000453342	0.906644	0.000746341	CEP295NL
ENSG00000173085	ENST00000621248	-0.906648	0.000746245	COQ2
ENSG00000141873	NONHSAT135581.2	0.906653	0.00074612	SLC39A3
ENSG00000254470	NONHSAT195963.1	0.906654	0.000746078	AP5B1
ENSG00000154978	NONHSAT175148.1	-0.90666	0.000745913	VOPP1
ENSG00000169727	ENST00000589777	-0.90667	0.000745644	GPS1
ENSG00000151572	ENST00000594576	0.906672	0.0007456	ANO4
ENSG00000129810	NONHSAT182459.1	-0.906674	0.000745528	SGOL1
ENSG00000174564	NONHSAT163874.1	0.906684	0.000745276	IL20RB
ENSG00000159314	NONHSAT001153.2	-0.906687	0.000745179	ARHGAP27
ENSG00000148154	NONHSAT208349.1	0.906689	0.000745126	UGCG
ENSG00000146410	NONHSAT221000.1	-0.906691	0.000745077	MTFR2
ENSG00000165323	NONHSAT168677.1	0.906698	0.000744873	FAT3
ENSG00000187753	NONHSAT194515.1	0.906701	0.000744794	C9orf153
ENSG00000185085	NONHSAT042166.2	-0.906712	0.000744515	INTS5
ENSG00000178685	NONHSAT194515.1	-0.906714	0.000744447	PARP10
ENSG00000182263	ENST00000498304	0.906716	0.000744396	FIGN
ENSG00000132031	ENST00000453342	-0.906722	0.00074422	MATN3
ENSG00000167083	NONHSAT096839.2	0.906724	0.000744167	GNGT2
ENSG00000133874	NONHSAT151590.1	0.906725	0.000744152	RNF122
ENSG00000114346	ENST00000414209	0.906732	0.000743959	ECT2
ENSG00000112769	ENST00000586321	-0.906734	0.000743918	LAMA4
ENSG00000173020	NONHSAT163253.1	0.906742	0.000743677	ADRBK1
ENSG00000011426	ENST00000429104	0.906746	0.000743572	ANLN
ENSG00000149782	NONHSAT162123.1	-0.906747	0.000743553	PLCB3
ENSG00000170312	NONHSAT182446.1	-0.906751	0.000743448	CDK1
ENSG00000120875	ENST00000366424	0.906759	0.000743232	DUSP4
ENSG00000172780	NONHSAT027381.2	0.906761	0.000743171	RAB43
ENSG00000103253	NONHSAT149978.1	0.906775	0.000742804	HAGHL
ENSG00000054179	NONHSAT107810.2	0.906778	0.000742707	ENTPD2
ENSG00000002586	ENST00000432267	-0.906788	0.000742439	CD99
ENSG00000145386	ENST00000554360	-0.90679	0.000742385	CCNA2
ENSG00000076382	NONHSAT182459.1	-0.906795	0.000742238	SPAG5
ENSG00000213445	NONHSAT211632.1	-0.906805	0.000741979	SIPA1
ENSG00000154485	ENST00000606839	0.906813	0.000741752	MMP21
ENSG00000137807	NONHSAT182451.1	-0.906816	0.000741692	KIF23
ENSG00000134574	NONHSAT175141.1	-0.906819	0.000741594	DDB2
ENSG00000196268	NONHSAT162255.1	-0.906829	0.000741329	ZNF493
ENSG00000113946	ENST00000537869	-0.906831	0.000741267	CLDN16
ENSG00000153283	NONHSAT211632.1	0.906835	0.000741164	CD96
ENSG00000161800	ENST00000606839	-0.906845	0.000740899	RACGAP1
ENSG00000129195	NONHSAT213988.1	-0.906851	0.000740728	FAM64A
ENSG00000109805	ENST00000537869	0.906855	0.000740616	NCAPG
ENSG00000135451	ENST00000594579	-0.906857	0.000740557	TROAP
ENSG00000175352	NONHSAT200243.1	-0.906869	0.000740234	NRIP3
ENSG00000186638	NONHSAT028252.2	0.90687	0.000740223	KIF24
ENSG00000005189	NONHSAT155504.1	-0.906871	0.000740193	AC004381.6
ENSG00000121281	NONHSAT042166.2	-0.906876	0.00074005	ADCY7
ENSG00000144136	NONHSAT175148.1	-0.906877	0.000740016	SLC20A1
ENSG00000051341	NONHSAT021826.2	0.906878	0.000740002	POLQ
ENSG00000090889	ENST00000605862	-0.906882	0.000739895	KIF4A
ENSG00000011304	NONHSAT152089.1	0.906886	0.000739785	PTBP1
ENSG00000160298	NONHSAT118785.2	0.906886	0.000739779	C21orf58
ENSG00000267534	NONHSAT021826.2	0.906892	0.000739613	S1PR2
ENSG00000101447	NONHSAT162123.1	-0.906894	0.000739555	FAM83D
ENSG00000135373	NONHSAT182451.1	0.906897	0.000739482	EHF
ENSG00000105669	ENST00000451781	0.906899	0.000739418	COPE
ENSG00000248483	NONHSAT163874.1	0.90691	0.000739137	POU5F2
ENSG00000278677	NONHSAT037576.2	0.90691	0.000739122	HIST1H2AM
ENSG00000278463	NONHSAT151590.1	0.906917	0.000738943	HIST1H2AB
ENSG00000188542	NONHSAT149381.1	-0.906919	0.000738886	DUSP28
ENSG00000169220	NONHSAT155504.1	-0.906926	0.00073869	RGS14
ENSG00000153714	NONHSAT037545.2	0.906945	0.000738185	LURAP1L
ENSG00000161996	NONHSAT190944.1	-0.906948	0.000738111	WDR90
ENSG00000115163	NONHSAT005235.2	-0.906952	0.000738002	CENPA
ENSG00000113391	NONHSAT149591.1	-0.906968	0.000737574	FAM172A
ENSG00000125319	NONHSAT155504.1	-0.906975	0.000737376	C17orf53
ENSG00000178035	NONHSAT107810.2	0.906976	0.000737337	IMPDH2
ENSG00000243710	MSTRG.43944.16	0.906981	0.000737204	CFAP57
ENSG00000175352	ENST00000603538	0.906983	0.000737168	NRIP3
ENSG00000112053	ENST00000530490	-0.906993	0.000736898	SLC26A8
ENSG00000184922	NONHSAT180414.1	-0.906994	0.000736855	FMNL1
ENSG00000140451	NONHSAT195963.1	0.906996	0.000736806	PIF1
ENSG00000081842	NONHSAT107044.2	0.906996	0.000736798	PCDHA6
ENSG00000167977	NONHSAT021826.2	0.906997	0.000736789	KCTD5
ENSG00000197858	NONHSAT163874.1	-0.906997	0.000736774	GPAA1
ENSG00000162946	NONHSAT216432.1	0.907002	0.000736654	DISC1
ENSG00000127989	ENST00000591069	-0.907012	0.000736365	MTERF1
ENSG00000171241	NONHSAT188701.1	0.907013	0.00073635	SHCBP1
ENSG00000117399	NONHSAT037545.2	-0.907024	0.000736062	CDC20
ENSG00000125319	NONHSAT194515.1	-0.907024	0.00073606	C17orf53
ENSG00000169220	NONHSAT162123.1	-0.907025	0.00073603	RGS14
ENSG00000111247	NONHSAT005235.2	-0.907031	0.000735862	RAD51AP1
ENSG00000181409	NONHSAT194515.1	-0.907033	0.000735799	AATK
ENSG00000149792	NONHSAT054798.2	0.907034	0.000735784	MRPL49
ENSG00000155729	NONHSAT163526.1	0.90704	0.000735625	KCTD18
ENSG00000139579	ENST00000427953	-0.907041	0.000735606	NABP2
ENSG00000267534	ENST00000623851	-0.907044	0.00073552	S1PR2
ENSG00000182902	NONHSAT175142.1	0.90705	0.000735342	SLC25A18
ENSG00000133313	ENST00000603538	0.907052	0.000735306	CNDP2
ENSG00000164109	NONHSAT215705.1	-0.907075	0.000734683	MAD2L1
ENSG00000184995	NONHSAT156901.1	0.907084	0.000734437	IFNE
ENSG00000137807	NONHSAT215705.1	-0.907085	0.000734418	KIF23
ENSG00000123395	NONHSAT215706.1	0.907086	0.000734379	ATG101
ENSG00000166803	ENST00000453698	0.907098	0.000734059	KIAA0101
ENSG00000160753	NONHSAT107810.2	0.907101	0.000733985	RUSC1
ENSG00000182263	ENST00000605862	0.907114	0.000733622	FIGN
ENSG00000180777	NONHSAT215706.1	-0.907141	0.000732906	ANKRD30B
ENSG00000105669	NONHSAT163952.1	0.907142	0.000732887	COPE
ENSG00000146918	NONHSAT037592.2	0.90715	0.00073265	NCAPG2
ENSG00000173559	NONHSAT155504.1	0.907185	0.000731734	NABP1
ENSG00000011426	NONHSAT180590.1	0.907186	0.000731694	ANLN
ENSG00000020577	NONHSAT155562.1	0.907197	0.000731402	SAMD4A
ENSG00000081842	NONHSAT179316.1	0.907208	0.000731091	PCDHA6
ENSG00000133597	NONHSAT162255.1	0.907211	0.000731014	ADCK2
ENSG00000181218	NONHSAT149591.1	0.907216	0.000730888	HIST3H2A
ENSG00000275074	NONHSAT175141.1	-0.907224	0.000730674	NUDT18
ENSG00000164611	ENST00000429962	0.907233	0.000730445	PTTG1
ENSG00000117411	NONHSAT107810.2	0.907233	0.00073043	B4GALT2
ENSG00000178404	NONHSAT107810.2	-0.907233	0.000730429	CEP295NL
ENSG00000123159	NONHSAT211632.1	-0.907233	0.000730426	GIPC1
ENSG00000079308	MSTRG.43922.4	0.907235	0.000730385	TNS1
ENSG00000184828	NONHSAT182459.1	-0.907241	0.000730215	ZBTB7C
ENSG00000112333	NONHSAT183370.1	0.907247	0.000730049	NR2E1
ENSG00000064652	NONHSAT155607.1	0.907256	0.00072982	SNX24
ENSG00000213626	NONHSAT118785.2	0.907271	0.000729413	LBH
ENSG00000137409	NONHSAT182446.1	-0.907278	0.000729238	MTCH1
ENSG00000107882	NONHSAT215705.1	-0.907282	0.000729108	SUFU
ENSG00000081842	NONHSAT122447.2	0.907287	0.000728983	PCDHA6
ENSG00000104883	NONHSAT042166.2	-0.907301	0.000728618	PEX11G
ENSG00000137270	ENST00000439129	0.907317	0.000728196	GCM1
ENSG00000117724	ENST00000623851	-0.907318	0.000728144	CENPF
ENSG00000169607	NONHSAT171185.1	-0.907332	0.000727793	CKAP2L
ENSG00000184922	NONHSAT070107.2	0.907338	0.000727634	FMNL1
ENSG00000116863	NONHSAT188701.1	0.907338	0.000727632	ADPRHL2
ENSG00000168078	NONHSAT188701.1	0.907338	0.000727618	PBK
ENSG00000196890	NONHSAT175142.1	-0.90734	0.000727569	HIST3H2BB
ENSG00000178726	NONHSAT175148.1	-0.907354	0.000727203	THBD
ENSG00000119411	NONHSAT163874.1	-0.907354	0.000727199	BSPRY
ENSG00000153714	ENST00000505133	0.907357	0.000727106	LURAP1L
ENSG00000167543	NONHSAT180590.1	0.907368	0.00072683	TP53I13
ENSG00000100124	NONHSAT180590.1	0.90737	0.000726755	ANKRD54
ENSG00000150625	ENST00000498304	0.907372	0.000726722	GPM6A
ENSG00000143153	NONHSAT171185.1	0.907379	0.000726513	ATP1B1
ENSG00000125877	NONHSAT037592.2	0.907384	0.000726397	ITPA
ENSG00000171385	NONHSAT149381.1	0.907388	0.000726282	KCND3
ENSG00000180777	NONHSAT037592.2	-0.907396	0.000726074	ANKRD30B
ENSG00000138379	NONHSAT175141.1	0.907398	0.000726023	MSTN
ENSG00000215018	NONHSAT215705.1	0.907404	0.000725865	COL28A1
ENSG00000150625	NONHSAT175141.1	0.907405	0.000725827	GPM6A
ENSG00000005801	NONHSAT212180.1	-0.907406	0.000725803	ZNF195
ENSG00000172059	ENST00000596594	0.907408	0.00072576	KLF11
ENSG00000243927	NONHSAT182451.1	0.907419	0.000725449	MRPS6
ENSG00000159314	ENST00000589777	-0.907424	0.000725332	ARHGAP27
ENSG00000184357	NONHSAT175141.1	-0.907433	0.000725079	HIST1H1B
ENSG00000109736	NONHSAT182446.1	-0.907439	0.000724917	MFSD10
ENSG00000090889	NONHSAT032479.2	-0.907447	0.000724716	KIF4A
ENSG00000182263	NONHSAT165541.1	0.907459	0.000724398	FIGN
ENSG00000212127	ENST00000552778	0.907462	0.000724313	TAS2R14
ENSG00000031081	NONHSAT182451.1	0.907465	0.000724241	ARHGAP31
ENSG00000069011	NONHSAT194515.1	-0.907466	0.000724203	PITX1
ENSG00000203872	NONHSAT163952.1	-0.90748	0.000723836	C6orf163
ENSG00000160298	NONHSAT193682.1	-0.907483	0.000723761	C21orf58
ENSG00000123240	NONHSAT175647.1	0.9075	0.000723301	OPTN
ENSG00000023909	NONHSAT221000.1	0.9075	0.000723298	GCLM
ENSG00000116117	ENST00000366424	0.907513	0.000722955	PARD3B
ENSG00000175216	NONHSAT163874.1	-0.907519	0.000722789	CKAP5
ENSG00000197858	NONHSAT211632.1	-0.907523	0.000722675	GPAA1
ENSG00000183010	NONHSAT070107.2	0.907525	0.000722626	PYCR1
ENSG00000130283	NONHSAT188797.1	0.907528	0.000722559	GDF1
ENSG00000169220	ENST00000623851	-0.90753	0.000722486	RGS14
ENSG00000169220	NONHSAT200243.1	-0.907533	0.000722408	RGS14
ENSG00000123080	ENST00000621248	-0.907562	0.000721635	CDKN2C
ENSG00000160789	NONHSAT161350.1	-0.907567	0.000721523	LMNA
ENSG00000105810	NONHSAT157731.1	-0.90757	0.000721432	CDK6
ENSG00000051128	ENST00000537869	0.907572	0.000721377	HOMER3
ENSG00000148154	NONHSAT046577.2	0.907586	0.000721021	UGCG
ENSG00000138271	NONHSAT178478.1	0.907587	0.000720983	GPR87
ENSG00000123080	NONHSAT158445.1	0.907592	0.000720839	CDKN2C
ENSG00000275074	NONHSAT162123.1	-0.907605	0.000720502	NUDT18
ENSG00000076382	NONHSAT171185.1	-0.907611	0.000720334	SPAG5
ENSG00000081842	NONHSAT083184.2	0.907625	0.00071998	PCDHA6
ENSG00000156970	NONHSAT193682.1	-0.907628	0.000719896	BUB1B
ENSG00000185361	NONHSAT193682.1	-0.907629	0.000719867	TNFAIP8L1
ENSG00000117676	ENST00000603538	0.90763	0.000719848	RPS6KA1
ENSG00000166912	NONHSAT168677.1	0.90763	0.000719827	MTMR10
ENSG00000064652	NONHSAT026976.2	0.90764	0.000719575	SNX24
ENSG00000137135	NONHSAT184726.1	0.907649	0.000719337	ARHGEF39
ENSG00000186665	NONHSAT182446.1	-0.907653	0.000719225	C17orf58
ENSG00000170667	ENST00000532319	0.90766	0.000719055	RASA4B
ENSG00000111665	ENST00000440574	0.907668	0.000718833	CDCA3
ENSG00000149782	NONHSAT005235.2	-0.907671	0.000718739	PLCB3
ENSG00000165323	NONHSAT165541.1	0.907672	0.000718725	FAT3
ENSG00000169692	ENST00000537869	0.907676	0.000718612	AGPAT2
ENSG00000103502	NONHSAT165541.1	-0.907682	0.000718458	CDIPT
ENSG00000051341	NONHSAT037545.2	-0.907693	0.000718177	POLQ
ENSG00000077942	NONHSAT183181.1	0.907695	0.000718119	FBLN1
ENSG00000188522	NONHSAT199551.1	-0.907696	0.000718076	FAM83G
ENSG00000171241	NONHSAT135407.2	0.907698	0.000718047	SHCBP1
ENSG00000186665	NONHSAT156901.1	-0.9077	0.000717984	C17orf58
ENSG00000221821	NONHSAT156713.1	0.9077	0.000717976	C6orf226
ENSG00000161682	ENST00000603538	0.907711	0.000717686	FAM171A2
ENSG00000100097	ENST00000508913	0.907739	0.000716946	LGALS1
ENSG00000267534	NONHSAT194515.1	-0.907742	0.000716863	S1PR2
ENSG00000181218	NONHSAT162123.1	-0.907743	0.000716838	HIST3H2A
ENSG00000140451	ENST00000621997	0.907747	0.000716738	PIF1
ENSG00000141404	NONHSAT056663.2	0.907749	0.000716679	GNAL
ENSG00000090889	NONHSAT162123.1	-0.90775	0.000716651	KIF4A
ENSG00000146918	ENST00000596594	0.907753	0.000716575	NCAPG2
ENSG00000177084	NONHSAT069084.2	0.907761	0.000716369	POLE
ENSG00000159216	ENST00000552778	0.907761	0.000716357	RUNX1
ENSG00000132026	NONHSAT189891.1	-0.90777	0.000716135	RTBDN
ENSG00000163362	ENST00000506340	-0.90777	0.00071612	C1orf106
ENSG00000244607	NONHSAT182451.1	0.907774	0.000716009	CCDC13
ENSG00000112333	NONHSAT175141.1	-0.90778	0.000715866	NR2E1
ENSG00000177971	NONHSAT069084.2	0.907792	0.00071554	IMP3
ENSG00000112333	ENST00000596594	0.907797	0.00071541	NR2E1
ENSG00000119938	ENST00000579050	0.907813	0.000714981	PPP1R3C
ENSG00000101997	NONHSAT001153.2	-0.907814	0.000714965	CCDC22
ENSG00000167554	NONHSAT023756.2	0.907814	0.000714958	ZNF610
ENSG00000156509	NONHSAT182926.1	-0.907814	0.000714958	FBXO43
ENSG00000165416	NONHSAT215706.1	-0.907823	0.000714721	SUGT1
ENSG00000117650	NONHSAT028252.2	0.907826	0.000714645	NEK2
ENSG00000145022	ENST00000537869	0.907827	0.00071463	TCTA
ENSG00000182310	NONHSAT118705.2	0.907827	0.000714609	SPACA6
ENSG00000276203	NONHSAT188701.1	-0.90783	0.000714553	ANKRD20A3
ENSG00000165731	ENST00000623851	-0.907839	0.000714313	RET
ENSG00000113163	ENST00000552778	0.907842	0.000714221	COL4A3BP
ENSG00000167136	NONHSAT013107.2	0.907852	0.000713973	ENDOG
ENSG00000100030	NONHSAT028252.2	0.907853	0.000713925	MAPK1
ENSG00000169607	ENST00000537869	0.907861	0.000713724	CKAP2L
ENSG00000144136	ENST00000594576	0.907866	0.000713596	SLC20A1
ENSG00000151611	NONHSAT215705.1	0.907866	0.000713593	MMAA
ENSG00000129195	ENST00000591069	0.907867	0.000713571	FAM64A
ENSG00000123080	NONHSAT182446.1	-0.907874	0.00071339	CDKN2C
ENSG00000125319	ENST00000623851	-0.907877	0.000713306	C17orf53
ENSG00000109736	NONHSAT195963.1	0.907878	0.000713266	MFSD10
ENSG00000179564	NONHSAT135407.2	-0.907881	0.000713199	LSMEM2
ENSG00000081842	NONHSAT025395.2	0.907881	0.000713189	PCDHA6
ENSG00000168078	ENST00000453342	-0.907895	0.000712814	PBK
ENSG00000160957	NONHSAT072537.2	0.9079	0.000712702	RECQL4
ENSG00000154839	NONHSAT221000.1	-0.907909	0.000712469	SKA1
ENSG00000123080	NONHSAT163526.1	0.907925	0.000712045	CDKN2C
ENSG00000124635	NONHSAT046577.2	-0.907928	0.000711947	HIST1H2BJ
ENSG00000134285	ENST00000621248	0.907942	0.000711581	FKBP11
ENSG00000168454	NONHSAT005235.2	0.907944	0.000711545	TXNDC2
ENSG00000160298	NONHSAT215705.1	-0.90795	0.00071137	C21orf58
ENSG00000106789	NONHSAT156901.1	-0.907951	0.000711338	CORO2A
ENSG00000169926	NONHSAT135581.2	0.907954	0.000711282	KLF13
ENSG00000146670	NONHSAT213988.1	-0.907958	0.000711157	CDCA5
ENSG00000204941	NONHSAT157283.1	-0.907977	0.000710655	PSG5
ENSG00000004399	NONHSAT163526.1	0.90798	0.000710596	PLXND1
ENSG00000198931	NONHSAT182446.1	-0.907982	0.000710525	APRT
ENSG00000091656	NONHSAT175148.1	0.907984	0.00071047	ZFHX4
ENSG00000159069	NONHSAT033795.2	0.907991	0.000710306	FBXW5
ENSG00000168356	NONHSAT175141.1	0.907991	0.00071029	SCN11A
ENSG00000023909	NONHSAT165541.1	0.908	0.00071005	GCLM
ENSG00000068028	ENST00000596594	0.908007	0.000709887	RASSF1
ENSG00000113946	NONHSAT216432.1	0.908015	0.000709667	CLDN16
ENSG00000198959	NONHSAT005235.2	-0.908018	0.000709589	TGM2
ENSG00000057704	NONHSAT198315.1	-0.90802	0.000709547	TMCC3
ENSG00000161800	ENST00000596594	0.90802	0.000709534	RACGAP1
ENSG00000035499	NONHSAT198315.1	-0.908025	0.000709414	DEPDC1B
ENSG00000137135	NONHSAT165541.1	-0.908035	0.000709149	ARHGEF39
ENSG00000005448	NONHSAT156901.1	-0.908037	0.000709087	WDR54
ENSG00000215018	NONHSAT151590.1	-0.908037	0.000709085	COL28A1
ENSG00000160298	NONHSAT175141.1	-0.90805	0.000708754	C21orf58
ENSG00000051341	NONHSAT118642.2	0.908052	0.000708694	POLQ
ENSG00000149930	NONHSAT200243.1	-0.908053	0.00070868	TAOK2
ENSG00000161800	ENST00000506340	0.908054	0.000708653	RACGAP1
ENSG00000137807	NONHSAT193682.1	-0.908063	0.000708396	KIF23
ENSG00000197858	NONHSAT042166.2	-0.908071	0.00070819	GPAA1
ENSG00000111665	NONHSAT028252.2	0.908076	0.000708063	CDCA3
ENSG00000215784	ENST00000594579	-0.90808	0.000707963	FAM72D
ENSG00000138778	NONHSAT180361.1	0.908083	0.00070788	CENPE
ENSG00000079616	NONHSAT193682.1	-0.908089	0.000707735	KIF22
ENSG00000154479	ENST00000429104	-0.90809	0.000707701	CCDC173
ENSG00000143224	NONHSAT180590.1	0.908111	0.000707146	PPOX
ENSG00000167553	ENST00000596594	0.908114	0.000707069	TUBA1C
ENSG00000180777	NONHSAT194515.1	0.908119	0.000706928	ANKRD30B
ENSG00000198796	NONHSAT037592.2	-0.908125	0.000706775	ALPK2
ENSG00000119938	NONHSAT156901.1	-0.908129	0.000706686	PPP1R3C
ENSG00000083520	NONHSAT216432.1	0.908129	0.000706675	DIS3
ENSG00000160789	NONHSAT208300.1	-0.908141	0.000706364	LMNA
ENSG00000167554	MSTRG.43944.16	0.908141	0.000706355	ZNF610
ENSG00000081842	NONHSAT151649.1	0.908143	0.000706308	PCDHA6
ENSG00000137807	ENST00000506340	0.908151	0.000706094	KIF23
ENSG00000069696	NONHSAT118785.2	0.908152	0.000706067	DRD4
ENSG00000183010	NONHSAT182459.1	-0.908156	0.00070596	PYCR1
ENSG00000137807	NONHSAT149381.1	-0.908166	0.000705702	KIF23
ENSG00000080986	NONHSAT037545.2	-0.908197	0.000704889	NDC80
ENSG00000125319	NONHSAT182446.1	-0.908214	0.000704437	C17orf53
ENSG00000248592	NONHSAT042166.2	-0.908219	0.000704318	TMEM110-MUSTN1
ENSG00000172059	NONHSAT163874.1	-0.90822	0.000704287	KLF11
ENSG00000188542	NONHSAT199551.1	-0.908222	0.000704244	DUSP28
ENSG00000135333	NONHSAT219745.1	-0.908227	0.000704099	EPHA7
ENSG00000138379	ENST00000545631	0.908232	0.000703965	MSTN
ENSG00000173559	NONHSAT032479.2	0.90824	0.000703765	NABP1
ENSG00000105287	NONHSAT021826.2	0.908241	0.000703739	PRKD2
ENSG00000103253	ENST00000506899	-0.908261	0.000703216	HAGHL
ENSG00000167723	NONHSAT216432.1	-0.908269	0.000703016	TRPV3
ENSG00000104059	ENST00000530490	0.908269	0.000703011	FAM189A1
ENSG00000104131	NONHSAT176684.1	0.908273	0.000702905	EIF3J
ENSG00000123159	NONHSAT194515.1	-0.908275	0.000702843	GIPC1
ENSG00000141873	NONHSAT182446.1	-0.908276	0.000702829	SLC39A3
ENSG00000133740	ENST00000453342	-0.908282	0.000702667	E2F5
ENSG00000148339	NONHSAT038132.2	0.908285	0.000702591	SLC25A25
ENSG00000248483	ENST00000621248	0.908287	0.000702551	POU5F2
ENSG00000105997	NONHSAT200243.1	-0.908295	0.000702335	HOXA3
ENSG00000129195	NONHSAT182459.1	-0.908296	0.000702319	FAM64A
ENSG00000108961	NONHSAT163874.1	-0.908317	0.000701756	RANGRF
ENSG00000163930	NONHSAT001153.2	-0.90832	0.000701675	BAP1
ENSG00000134256	NONHSAT013107.2	-0.908336	0.000701264	CD101
ENSG00000123395	ENST00000620490	-0.908338	0.000701204	ATG101
ENSG00000105287	NONHSAT200447.1	0.90834	0.000701154	PRKD2
ENSG00000069011	NONHSAT183181.1	0.908343	0.000701076	PITX1
ENSG00000127364	NONHSAT118785.2	-0.908343	0.000701075	TAS2R4
ENSG00000100422	ENST00000621248	-0.90839	0.000699843	CERK
ENSG00000150625	NONHSAT070107.2	-0.908399	0.000699616	GPM6A
ENSG00000103260	NONHSAT163874.1	-0.908403	0.000699522	METRN
ENSG00000164087	NONHSAT189891.1	-0.908412	0.00069929	POC1A
ENSG00000174236	NONHSAT198315.1	0.908419	0.000699102	REP15
ENSG00000164109	NONHSAT069084.2	0.90842	0.000699069	MAD2L1
ENSG00000104131	NONHSAT191017.1	0.90842	0.000699067	EIF3J
ENSG00000127666	NONHSAT033795.2	0.908424	0.000698972	TICAM1
ENSG00000186628	NONHSAT215705.1	0.908431	0.000698792	FSD2
ENSG00000165323	NONHSAT144680.2	0.908432	0.000698769	FAT3
ENSG00000188993	ENST00000506899	0.908444	0.000698449	LRRC66
ENSG00000127561	NONHSAT211632.1	-0.908453	0.000698212	SYNGR3
ENSG00000150667	ENST00000401788	-0.908457	0.000698103	FSIP1
ENSG00000135451	NONHSAT165541.1	-0.908462	0.000697981	TROAP
ENSG00000167554	ENST00000624248	0.908466	0.000697872	ZNF610
ENSG00000247077	NONHSAT162123.1	-0.908472	0.000697719	PGAM5
ENSG00000135333	ENST00000439129	0.908473	0.000697695	EPHA7
ENSG00000108106	NONHSAT215706.1	0.908478	0.000697564	UBE2S
ENSG00000113946	NONHSAT194515.1	0.908481	0.000697499	CLDN16
ENSG00000180777	ENST00000552778	0.908484	0.000697422	ANKRD30B
ENSG00000142632	ENST00000589777	-0.90849	0.000697244	ARHGEF19
ENSG00000169221	NONHSAT190944.1	-0.90849	0.000697243	TBC1D10B
ENSG00000161800	NONHSAT168677.1	-0.908499	0.000697028	RACGAP1
ENSG00000203812	NONHSAT182451.1	-0.908508	0.000696783	HIST2H2AA3
ENSG00000116329	ENST00000498304	-0.908513	0.000696648	OPRD1
ENSG00000172059	NONHSAT069084.2	0.908521	0.000696452	KLF11
ENSG00000138617	ENST00000603538	0.90853	0.000696224	PARP16
ENSG00000169692	NONHSAT013107.2	0.908544	0.00069585	AGPAT2
ENSG00000187098	ENST00000506899	0.90855	0.000695697	MITF
ENSG00000177084	NONHSAT175141.1	-0.90855	0.000695692	POLE
ENSG00000161800	NONHSAT021826.2	0.908557	0.000695506	RACGAP1
ENSG00000187098	NONHSAT176288.1	-0.90856	0.000695437	MITF
ENSG00000102996	NONHSAT005235.2	-0.908561	0.000695402	MMP15
ENSG00000165060	NONHSAT135407.2	0.908569	0.000695207	FXN
ENSG00000112333	NONHSAT005235.2	-0.908584	0.000694807	NR2E1
ENSG00000168209	NONHSAT193682.1	-0.908586	0.000694759	DDIT4
ENSG00000153130	ENST00000439129	-0.908593	0.000694583	SCOC
ENSG00000099625	NONHSAT215705.1	-0.908612	0.000694083	CBARP
ENSG00000172819	NONHSAT118785.2	0.908618	0.000693938	RARG
ENSG00000146410	NONHSAT188701.1	0.90862	0.000693886	MTFR2
ENSG00000169607	ENST00000427953	-0.908621	0.000693868	CKAP2L
ENSG00000122863	NONHSAT135581.2	0.908623	0.000693796	CHST3
ENSG00000140995	NONHSAT183370.1	0.908629	0.000693656	DEF8
ENSG00000143603	NONHSAT182926.1	0.908641	0.000693336	KCNN3
ENSG00000147036	ENST00000620490	0.908642	0.000693305	LANCL3
ENSG00000204941	NONHSAT182459.1	0.908646	0.000693216	PSG5
ENSG00000175520	NONHSAT168803.1	0.908655	0.000692985	UBQLN3
ENSG00000185361	NONHSAT216957.1	0.908661	0.000692816	TNFAIP8L1
ENSG00000171928	ENST00000427953	0.908663	0.000692773	TVP23B
ENSG00000117650	NONHSAT188701.1	0.908669	0.000692626	NEK2
ENSG00000168702	NONHSAT194515.1	0.908677	0.0006924	LRP1B
ENSG00000168209	NONHSAT156901.1	-0.908678	0.000692375	DDIT4
ENSG00000167553	NONHSAT215705.1	-0.908682	0.000692278	TUBA1C
ENSG00000178035	NONHSAT162255.1	0.908691	0.000692046	IMPDH2
ENSG00000154265	NONHSAT107810.2	-0.908715	0.00069143	ABCA5
ENSG00000169679	NONHSAT155504.1	-0.908715	0.000691427	BUB1
ENSG00000213672	NONHSAT180590.1	0.90872	0.000691298	NCKIPSD
ENSG00000129810	NONHSAT182926.1	-0.908723	0.000691213	SGOL1
ENSG00000119431	NONHSAT200447.1	0.908733	0.000690954	HDHD3
ENSG00000142178	ENST00000606839	-0.908741	0.00069075	SIK1
ENSG00000079616	NONHSAT215705.1	-0.908748	0.000690591	KIF22
ENSG00000117399	NONHSAT219745.1	0.908762	0.000690226	CDC20
ENSG00000164951	ENST00000475371	0.908771	0.000689982	PDP1
ENSG00000130283	NONHSAT035480.2	0.908772	0.000689967	GDF1
ENSG00000051341	NONHSAT182451.1	-0.908792	0.000689448	POLQ
ENSG00000055955	NONHSAT141113.2	-0.908792	0.000689436	ITIH4
ENSG00000145386	NONHSAT153055.1	-0.908794	0.000689382	CCNA2
ENSG00000167543	NONHSAT042166.2	-0.908801	0.000689224	TP53I13
ENSG00000157456	ENST00000506899	-0.908809	0.000689004	CCNB2
ENSG00000141404	NONHSAT144554.2	0.90881	0.000688969	GNAL
ENSG00000144488	NONHSAT135581.2	-0.908814	0.000688868	ESPNL
ENSG00000174236	NONHSAT005235.2	0.908817	0.000688792	REP15
ENSG00000142327	NONHSAT163952.1	0.90882	0.000688725	RNPEPL1
ENSG00000163808	NONHSAT144680.2	-0.908832	0.00068841	KIF15
ENSG00000180834	NONHSAT163499.1	-0.90884	0.000688201	MAP6D1
ENSG00000062038	ENST00000453342	0.908843	0.000688131	CDH3
ENSG00000083520	NONHSAT158445.1	-0.908851	0.000687938	DIS3
ENSG00000185480	NONHSAT200243.1	-0.908855	0.000687832	PARPBP
ENSG00000112769	ENST00000552778	0.90886	0.000687691	LAMA4
ENSG00000251322	NONHSAT194515.1	-0.908864	0.000687604	SHANK3
ENSG00000177084	ENST00000596594	0.908878	0.000687229	POLE
ENSG00000197122	NONHSAT194515.1	-0.908879	0.000687204	SRC
ENSG00000125409	NONHSAT183221.1	-0.908884	0.000687077	TEKT3
ENSG00000172889	ENST00000537869	0.908889	0.000686949	EGFL7
ENSG00000213799	ENST00000537925	0.908899	0.000686694	ZNF845
ENSG00000167723	NONHSAT156901.1	-0.908903	0.000686582	TRPV3
ENSG00000101997	NONHSAT215705.1	-0.908903	0.000686578	CCDC22
ENSG00000134202	NONHSAT215705.1	0.908911	0.000686372	GSTM3
ENSG00000133961	NONHSAT136352.2	-0.908917	0.000686233	NUMB
ENSG00000167325	NONHSAT182451.1	-0.90892	0.000686151	RRM1
ENSG00000274641	ENST00000440574	0.908935	0.000685763	HIST1H2BO
ENSG00000103502	NONHSAT183181.1	0.908943	0.000685568	CDIPT
ENSG00000175520	ENST00000594576	-0.908943	0.00068555	UBQLN3
ENSG00000105287	ENST00000621248	-0.908947	0.00068546	PRKD2
ENSG00000213626	NONHSAT182451.1	-0.908958	0.000685164	LBH
ENSG00000157456	NONHSAT168803.1	-0.908962	0.000685079	CCNB2
ENSG00000143603	NONHSAT171185.1	0.908963	0.000685057	KCNN3
ENSG00000165060	ENST00000335142	0.908972	0.00068482	FXN
ENSG00000114779	NONHSAT153055.1	-0.908977	0.0006847	ABHD14B
ENSG00000117650	NONHSAT162123.1	-0.908977	0.000684688	NEK2
ENSG00000004399	NONHSAT001153.2	-0.908978	0.000684656	PLXND1
ENSG00000213799	ENST00000502693	0.908986	0.000684461	ZNF845
ENSG00000168702	NONHSAT182446.1	0.908991	0.000684332	LRP1B
ENSG00000166912	NONHSAT027870.2	0.908995	0.000684239	MTMR10
ENSG00000160803	NONHSAT168834.1	0.908997	0.000684185	UBQLN4
ENSG00000011426	NONHSAT215705.1	-0.909002	0.000684052	ANLN
ENSG00000149930	NONHSAT191017.1	-0.909013	0.000683776	TAOK2
ENSG00000276203	NONHSAT155504.1	0.909017	0.000683673	ANKRD20A3
ENSG00000170312	NONHSAT032479.2	-0.909025	0.000683457	CDK1
ENSG00000171017	ENST00000323813	0.909033	0.000683256	LRRC8E
ENSG00000143153	NONHSAT193897.1	0.909038	0.000683126	ATP1B1
ENSG00000172889	NONHSAT135581.2	0.909043	0.000682989	EGFL7
ENSG00000169220	NONHSAT180590.1	0.909046	0.000682934	RGS14
ENSG00000143776	NONHSAT162123.1	0.909048	0.000682877	CDC42BPA
ENSG00000120875	NONHSAT188701.1	-0.909049	0.000682857	DUSP4
ENSG00000167553	NONHSAT021826.2	0.909054	0.000682716	TUBA1C
ENSG00000144488	NONHSAT182459.1	0.909059	0.000682591	ESPNL
ENSG00000197587	NONHSAT118642.2	0.909062	0.000682515	DMBX1
ENSG00000143858	NONHSAT199551.1	0.909063	0.000682497	SYT2
ENSG00000187266	ENST00000530490	0.909063	0.000682484	EPOR
ENSG00000051128	ENST00000623851	-0.909064	0.000682457	HOMER3
ENSG00000172059	ENST00000475371	0.909071	0.000682271	KLF11
ENSG00000076826	NONHSAT162123.1	-0.909074	0.000682211	CAMSAP3
ENSG00000156509	ENST00000506899	-0.909079	0.000682086	FBXO43
ENSG00000187642	NONHSAT168803.1	0.909083	0.000681981	PERM1
ENSG00000130283	NONHSAT176627.1	0.909083	0.000681968	GDF1
ENSG00000198363	NONHSAT189891.1	0.909084	0.000681958	ASPH
ENSG00000197136	NONHSAT190944.1	-0.909087	0.000681866	PCNXL3
ENSG00000106268	NONHSAT156901.1	-0.909089	0.000681815	NUDT1
ENSG00000113163	NONHSAT211632.1	0.909094	0.000681699	COL4A3BP
ENSG00000165899	NONHSAT180288.1	0.909098	0.000681596	OTOGL
ENSG00000148154	ENST00000623851	0.9091	0.000681544	UGCG
ENSG00000197122	NONHSAT028252.2	0.90911	0.00068129	SRC
ENSG00000069943	NONHSAT005235.2	-0.90912	0.000681019	PIGB
ENSG00000248235	NONHSAT124339.2	0.909122	0.000680987	AC037459.4
ENSG00000109016	ENST00000603538	0.909125	0.000680912	DHRS7B
ENSG00000077420	MSTRG.43944.16	0.909126	0.000680874	APBB1IP
ENSG00000125409	NONHSAT182446.1	0.909127	0.000680862	TEKT3
ENSG00000243927	ENST00000506899	0.909132	0.000680714	MRPS6
ENSG00000187642	NONHSAT219745.1	-0.909151	0.000680236	PERM1
ENSG00000107872	NONHSAT118785.2	0.909154	0.000680153	FBXL15
ENSG00000188993	NONHSAT183370.1	-0.909171	0.000679737	LRRC66
ENSG00000106351	ENST00000532319	0.909172	0.000679714	AGFG2
ENSG00000121775	NONHSAT194515.1	-0.909177	0.000679576	TMEM39B
ENSG00000241945	NONHSAT183181.1	0.909177	0.000679571	PWP2
ENSG00000185361	NONHSAT175148.1	-0.909179	0.000679512	TNFAIP8L1
ENSG00000278677	NONHSAT135581.2	0.909182	0.000679436	HIST1H2AM
ENSG00000002586	NONHSAT202728.1	-0.9092	0.000678994	CD99
ENSG00000153714	NONHSAT175141.1	0.909208	0.000678772	LURAP1L
ENSG00000138617	NONHSAT156713.1	0.909223	0.000678415	PARP16
ENSG00000142444	NONHSAT183181.1	0.90923	0.000678216	C19orf52
ENSG00000187642	NONHSAT175148.1	0.909247	0.000677788	PERM1
ENSG00000143603	NONHSAT193897.1	0.909247	0.000677782	KCNN3
ENSG00000110628	NONHSAT203396.1	-0.909253	0.000677637	SLC22A18
ENSG00000133597	NONHSAT190944.1	-0.909264	0.000677369	ADCK2
ENSG00000051128	NONHSAT216432.1	-0.909273	0.000677124	HOMER3
ENSG00000175352	NONHSAT005235.2	-0.909283	0.00067687	NRIP3
ENSG00000135373	NONHSAT156901.1	0.909285	0.000676821	EHF
ENSG00000071539	ENST00000453342	-0.909289	0.000676732	TRIP13
ENSG00000130726	ENST00000603538	0.909296	0.000676546	TRIM28
ENSG00000113763	NONHSAT070107.2	0.909305	0.000676304	UNC5A
ENSG00000120802	ENST00000621248	-0.909306	0.000676281	TMPO
ENSG00000215784	NONHSAT168803.1	-0.90931	0.000676181	FAM72D
ENSG00000185033	NONHSAT157283.1	0.909311	0.000676169	SEMA4B
ENSG00000068028	NONHSAT163863.1	0.909311	0.000676161	RASSF1
ENSG00000080986	NONHSAT182446.1	-0.909314	0.000676079	NDC80
ENSG00000005448	NONHSAT135407.2	0.909315	0.000676072	WDR54
ENSG00000101255	ENST00000603538	0.909326	0.000675794	TRIB3
ENSG00000176563	NONHSAT004455.2	0.909328	0.000675723	CNTD1
ENSG00000150625	ENST00000594576	-0.909329	0.000675709	GPM6A
ENSG00000100242	NONHSAT215706.1	0.90933	0.000675677	SUN2
ENSG00000108961	NONHSAT176260.1	0.909339	0.000675464	RANGRF
ENSG00000178726	NONHSAT142277.2	-0.909339	0.000675456	THBD
ENSG00000145741	NONHSAT023756.2	0.909346	0.000675277	BTF3
ENSG00000187957	NONHSAT183370.1	0.909349	0.000675189	DNER
ENSG00000158747	ENST00000449500	0.909351	0.000675142	NBL1
ENSG00000068489	ENST00000475371	0.909353	0.000675098	PRR11
ENSG00000143228	NONHSAT037545.2	-0.909376	0.000674513	NUF2
ENSG00000107882	NONHSAT023756.2	-0.909378	0.000674469	SUFU
ENSG00000189043	ENST00000429962	0.909378	0.000674454	NDUFA4
ENSG00000135314	ENST00000603538	0.909387	0.000674227	KHDC1
ENSG00000182809	NONHSAT175141.1	-0.90939	0.000674161	CRIP2
ENSG00000005007	NONHSAT023756.2	-0.909408	0.000673696	UPF1
ENSG00000100626	NONHSAT180590.1	0.909424	0.000673291	GALNT16
ENSG00000117650	ENST00000594579	-0.909438	0.000672951	NEK2
ENSG00000124143	NONHSAT155504.1	0.909454	0.00067253	ARHGAP40
ENSG00000134057	NONHSAT028252.2	0.909456	0.000672474	CCNB1
ENSG00000129810	NONHSAT163874.1	-0.909458	0.000672438	SGOL1
ENSG00000128298	NONHSAT056663.2	0.909459	0.000672402	BAIAP2L2
ENSG00000139531	NONHSAT142596.2	0.909463	0.000672304	SUOX
ENSG00000081842	NONHSAT062975.2	0.909474	0.000672023	PCDHA6
ENSG00000129116	ENST00000615178	0.909477	0.000671964	PALLD
ENSG00000119431	NONHSAT021826.2	0.909477	0.00067195	HDHD3
ENSG00000205138	NONHSAT069084.2	0.909477	0.000671943	SDHAF1
ENSG00000142444	NONHSAT211632.1	-0.909478	0.000671933	C19orf52
ENSG00000169679	NONHSAT163499.1	-0.909482	0.000671821	BUB1
ENSG00000180891	NONHSAT042166.2	-0.909483	0.000671791	CUEDC1
ENSG00000120875	ENST00000605862	0.909485	0.000671744	DUSP4
ENSG00000131386	ENST00000429104	-0.909496	0.000671466	GALNT15
ENSG00000117724	NONHSAT208300.1	-0.909508	0.00067116	CENPF
ENSG00000117411	NONHSAT163874.1	-0.909511	0.000671104	B4GALT2
ENSG00000226124	ENST00000594576	0.909516	0.000670969	FTCDNL1
ENSG00000104059	NONHSAT194515.1	-0.909529	0.000670637	FAM189A1
ENSG00000185361	ENST00000603538	0.909531	0.000670575	TNFAIP8L1
ENSG00000186976	ENST00000594576	-0.909534	0.000670518	EFCAB6
ENSG00000197587	NONHSAT156901.1	-0.909537	0.000670431	DMBX1
ENSG00000203812	NONHSAT171185.1	-0.909549	0.000670127	HIST2H2AA3
ENSG00000176563	NONHSAT168631.1	0.909561	0.000669833	CNTD1
ENSG00000011426	NONHSAT193682.1	-0.909574	0.000669501	ANLN
ENSG00000135333	NONHSAT161350.1	0.909578	0.000669407	EPHA7
ENSG00000117650	NONHSAT037545.2	-0.909578	0.000669395	NEK2
ENSG00000101216	NONHSAT194515.1	-0.909582	0.000669291	GMEB2
ENSG00000054116	NONHSAT149591.1	0.909582	0.00066929	TRAPPC3
ENSG00000143153	ENST00000620490	0.909583	0.000669262	ATP1B1
ENSG00000149782	NONHSAT070107.2	0.909587	0.000669185	PLCB3
ENSG00000175216	NONHSAT158445.1	0.909593	0.000669029	CKAP5
ENSG00000068489	ENST00000440574	0.909601	0.000668813	PRR11
ENSG00000127990	NONHSAT193897.1	0.909602	0.000668788	SGCE
ENSG00000111247	NONHSAT156713.1	0.909613	0.000668509	RAD51AP1
ENSG00000279765	NONHSAT182446.1	0.909617	0.000668408	RP11-437B10.1
ENSG00000124635	NONHSAT189891.1	-0.909622	0.000668293	HIST1H2BJ
ENSG00000153714	NONHSAT194515.1	0.909624	0.000668249	LURAP1L
ENSG00000101216	NONHSAT203396.1	-0.909626	0.000668187	GMEB2
ENSG00000177971	NONHSAT200447.1	0.909626	0.000668186	IMP3
ENSG00000188747	NONHSAT107810.2	0.909638	0.000667898	NOXA1
ENSG00000154839	NONHSAT184726.1	0.909649	0.000667602	SKA1
ENSG00000180834	NONHSAT168677.1	-0.90965	0.000667587	MAP6D1
ENSG00000187957	NONHSAT182446.1	-0.909655	0.000667466	DNER
ENSG00000172732	NONHSAT163253.1	0.909664	0.00066724	MUS81
ENSG00000189139	NONHSAT203413.1	-0.909665	0.000667202	FSCB
ENSG00000145860	NONHSAT175141.1	0.909666	0.000667175	RNF145
ENSG00000142945	NONHSAT163874.1	-0.909667	0.000667148	KIF2C
ENSG00000187778	NONHSAT215706.1	0.90967	0.000667093	MCRS1
ENSG00000115275	NONHSAT100694.2	0.909676	0.000666918	MOGS
ENSG00000166189	NONHSAT190944.1	-0.909679	0.000666864	HPS6
ENSG00000104147	NONHSAT028252.2	0.90968	0.000666841	OIP5
ENSG00000144488	ENST00000429104	-0.909686	0.000666674	ESPNL
ENSG00000148297	ENST00000620617	0.909688	0.00066664	MED22
ENSG00000075218	NONHSAT163499.1	-0.909688	0.000666637	GTSE1
ENSG00000148297	NONHSAT165541.1	-0.909692	0.00066653	MED22
ENSG00000110955	NONHSAT087513.2	0.909694	0.000666478	ATP5B
ENSG00000203811	ENST00000623851	-0.909698	0.000666368	HIST2H3C
ENSG00000109736	ENST00000451781	0.909704	0.000666225	MFSD10
ENSG00000113070	NONHSAT149381.1	0.90971	0.000666075	HBEGF
ENSG00000243927	NONHSAT171185.1	0.909713	0.000666001	MRPS6
ENSG00000171097	ENST00000621248	-0.909721	0.000665804	CCBL1
ENSG00000154485	NONHSAT175141.1	0.909722	0.000665782	MMP21
ENSG00000185262	NONHSAT157731.1	0.909724	0.000665718	UBALD2
ENSG00000105810	NONHSAT182459.1	0.909725	0.00066571	CDK6
ENSG00000113391	ENST00000552778	0.909731	0.000665538	FAM172A
ENSG00000147036	NONHSAT165541.1	0.90974	0.00066533	LANCL3
ENSG00000278828	ENST00000537869	0.90974	0.000665318	HIST1H3H
ENSG00000197136	NONHSAT211632.1	-0.909751	0.000665049	PCNXL3
ENSG00000134574	NONHSAT163874.1	-0.909762	0.000664766	DDB2
ENSG00000185038	NONHSAT156901.1	0.909763	0.000664754	MROH2A
ENSG00000020577	NONHSAT153055.1	0.909768	0.000664615	SAMD4A
ENSG00000076382	NONHSAT221000.1	-0.909773	0.0006645	SPAG5
ENSG00000059122	NONHSAT182446.1	-0.909785	0.000664184	FLYWCH1
ENSG00000159111	NONHSAT156145.1	-0.909793	0.000663997	MRPL10
ENSG00000123159	NONHSAT180590.1	0.909803	0.000663744	GIPC1
ENSG00000125731	NONHSAT119833.2	0.909806	0.00066366	SH2D3A
ENSG00000145220	ENST00000453342	0.90981	0.000663572	LYAR
ENSG00000151611	NONHSAT118642.2	-0.909812	0.000663511	MMAA
ENSG00000148297	ENST00000620490	-0.909824	0.00066322	MED22
ENSG00000106351	NONHSAT219745.1	-0.909825	0.000663178	AGFG2
ENSG00000155729	ENST00000423477	-0.909828	0.000663122	KCTD18
ENSG00000186222	ENST00000623851	-0.909837	0.000662898	BLOC1S4
ENSG00000137561	NONHSAT215705.1	-0.909843	0.000662744	TTPA
ENSG00000182263	NONHSAT219745.1	-0.909849	0.000662593	FIGN
ENSG00000100097	NONHSAT163526.1	0.909854	0.000662452	LGALS1
ENSG00000198931	NONHSAT042166.2	-0.909871	0.000662046	APRT
ENSG00000242419	NONHSAT215705.1	0.909878	0.000661872	PCDHGC4
ENSG00000188993	NONHSAT158445.1	-0.909882	0.000661751	LRRC66
ENSG00000077420	NONHSAT175141.1	0.909884	0.000661717	APBB1IP
ENSG00000173653	NONHSAT195963.1	0.909893	0.000661487	RCE1
ENSG00000178726	NONHSAT189891.1	-0.909896	0.000661401	THBD
ENSG00000226124	ENST00000530490	0.909899	0.000661345	FTCDNL1
ENSG00000137135	ENST00000594579	-0.909901	0.000661271	ARHGEF39
ENSG00000138617	NONHSAT216432.1	-0.909902	0.000661247	PARP16
ENSG00000165731	NONHSAT155504.1	-0.909917	0.000660891	RET
ENSG00000121281	ENST00000586321	0.909924	0.000660699	ADCY7
ENSG00000106268	NONHSAT215706.1	0.909933	0.000660489	NUDT1
ENSG00000182809	NONHSAT215705.1	-0.909935	0.000660421	CRIP2
ENSG00000179958	NONHSAT001153.2	-0.909936	0.000660413	DCTPP1
ENSG00000215421	NONHSAT042166.2	0.909941	0.000660281	ZNF407
ENSG00000167325	NONHSAT162255.1	0.909947	0.000660122	RRM1
ENSG00000108106	NONHSAT163952.1	0.90996	0.000659801	UBE2S
ENSG00000172059	ENST00000530490	0.909966	0.000659653	KLF11
ENSG00000163507	NONHSAT168803.1	-0.909967	0.00065963	KIAA1524
ENSG00000196155	ENST00000589777	-0.909968	0.000659612	PLEKHG4
ENSG00000113163	NONHSAT156713.1	-0.909977	0.000659389	COL4A3BP
ENSG00000140451	NONHSAT188701.1	0.909979	0.000659321	PIF1
ENSG00000064652	MSTRG.44668.2	0.909985	0.000659184	SNX24
ENSG00000178726	NONHSAT171185.1	-0.909989	0.000659096	THBD
ENSG00000182263	NONHSAT144680.2	0.910003	0.000658723	FIGN
ENSG00000248592	NONHSAT084536.2	0.910015	0.000658446	TMEM110-MUSTN1
ENSG00000234965	ENST00000505133	-0.910021	0.000658283	SHISA8
ENSG00000177045	ENST00000451781	0.910025	0.000658183	SIX5
ENSG00000251322	NONHSAT182446.1	-0.910028	0.000658116	SHANK3
ENSG00000117411	NONHSAT183181.1	0.910041	0.000657796	B4GALT2
ENSG00000100027	ENST00000603538	0.910043	0.000657726	YPEL1
ENSG00000185585	ENST00000596594	0.910051	0.000657538	OLFML2A
ENSG00000181035	NONHSAT203396.1	-0.910052	0.000657524	SLC25A42
ENSG00000146670	ENST00000596594	0.910054	0.00065746	CDCA5
ENSG00000158470	NONHSAT156901.1	0.910058	0.000657363	B4GALT5
ENSG00000185585	NONHSAT151590.1	0.910067	0.000657145	OLFML2A
ENSG00000175216	NONHSAT200447.1	0.910076	0.000656918	CKAP5
ENSG00000180758	NONHSAT118785.2	0.910077	0.0006569	GPR157
ENSG00000123080	NONHSAT149381.1	-0.910094	0.000656474	CDKN2C
ENSG00000111665	NONHSAT005235.2	-0.910098	0.000656367	CDCA3
ENSG00000161800	NONHSAT156713.1	0.910107	0.000656138	RACGAP1
ENSG00000142444	NONHSAT024251.2	0.910112	0.000656006	C19orf52
ENSG00000129810	ENST00000530490	0.910113	0.000655998	SGOL1
ENSG00000268447	NONHSAT168677.1	0.910117	0.000655898	SSX2B
ENSG00000138778	NONHSAT221000.1	-0.910119	0.000655854	CENPE
ENSG00000072071	NONHSAT162123.1	-0.910123	0.000655753	ADGRL1
ENSG00000048140	ENST00000609204	0.910127	0.00065565	TSPAN17
ENSG00000116731	NONHSAT001153.2	-0.91013	0.000655573	PRDM2
ENSG00000172889	NONHSAT194515.1	-0.910137	0.000655406	EGFL7
ENSG00000187634	NONHSAT180414.1	-0.910138	0.000655375	SAMD11
ENSG00000100097	NONHSAT189891.1	-0.91014	0.000655327	LGALS1
ENSG00000145860	NONHSAT216432.1	0.910145	0.000655206	RNF145
ENSG00000185262	NONHSAT180414.1	-0.910157	0.0006549	UBALD2
ENSG00000105669	NONHSAT180590.1	0.910163	0.000654744	COPE
ENSG00000132017	ENST00000449500	0.910164	0.000654728	DCAF15
ENSG00000126246	NONHSAT183370.1	0.910165	0.000654702	IGFLR1
ENSG00000177971	NONHSAT163874.1	-0.91017	0.000654581	IMP3
ENSG00000105376	NONHSAT190944.1	-0.910175	0.000654462	ICAM5
ENSG00000180834	NONHSAT183181.1	0.910178	0.000654385	MAP6D1
ENSG00000143153	NONHSAT163526.1	-0.910181	0.000654302	ATP1B1
ENSG00000183010	NONHSAT163874.1	-0.910186	0.000654168	PYCR1
ENSG00000188763	NONHSAT193682.1	-0.910194	0.000653982	FZD9
ENSG00000059122	NONHSAT135581.2	0.910199	0.000653858	FLYWCH1
ENSG00000149930	ENST00000621248	-0.9102	0.00065382	TAOK2
ENSG00000084092	NONHSAT157283.1	0.910209	0.0006536	NOA1
ENSG00000188763	NONHSAT168677.1	-0.91021	0.000653595	FZD9
ENSG00000118518	NONHSAT035921.2	-0.910224	0.000653226	RNF146
ENSG00000183856	NONHSAT070107.2	0.910226	0.000653195	IQGAP3
ENSG00000196155	NONHSAT194515.1	-0.910227	0.000653168	PLEKHG4
ENSG00000173085	NONHSAT149381.1	-0.910229	0.000653111	COQ2
ENSG00000140534	NONHSAT046577.2	-0.910231	0.000653064	TICRR
ENSG00000168298	NONHSAT193682.1	-0.910239	0.000652866	HIST1H1E
ENSG00000072864	NONHSAT216432.1	-0.910243	0.000652766	NDE1
ENSG00000196449	NONHSAT042166.2	-0.910246	0.000652683	YRDC
ENSG00000106351	ENST00000606839	0.910247	0.000652661	AGFG2
ENSG00000178035	NONHSAT178478.1	-0.910263	0.000652261	IMPDH2
ENSG00000169972	NONHSAT156145.1	-0.910283	0.000651764	PUSL1
ENSG00000137726	NONHSAT151256.1	0.910287	0.000651664	FXYD6
ENSG00000169220	NONHSAT211632.1	-0.910294	0.000651495	RGS14
ENSG00000099822	NONHSAT155504.1	-0.910298	0.000651409	HCN2
ENSG00000174564	NONHSAT200243.1	0.91032	0.000650865	IL20RB
ENSG00000158470	ENST00000505133	0.910326	0.000650719	B4GALT5
ENSG00000167977	NONHSAT135581.2	0.910335	0.000650491	KCTD5
ENSG00000173085	NONHSAT213988.1	-0.910336	0.000650472	COQ2
ENSG00000116863	NONHSAT135407.2	0.910349	0.000650136	ADPRHL2
ENSG00000173456	NONHSAT183181.1	0.910373	0.000649547	RNF26
ENSG00000242221	NONHSAT156901.1	0.910379	0.000649402	PSG2
ENSG00000124507	NONHSAT056663.2	0.910386	0.000649222	PACSIN1
ENSG00000104131	NONHSAT175142.1	0.910389	0.00064916	EIF3J
ENSG00000149541	ENST00000603538	0.910393	0.000649051	B3GAT3
ENSG00000055955	NONHSAT166199.1	-0.910397	0.000648942	ITIH4
ENSG00000150667	NONHSAT175142.1	0.910399	0.000648894	FSIP1
ENSG00000008394	NONHSAT180590.1	-0.910408	0.000648692	MGST1
ENSG00000059122	NONHSAT107810.2	0.910421	0.00064835	FLYWCH1
ENSG00000106268	NONHSAT135407.2	0.910428	0.000648198	NUDT1
ENSG00000179134	ENST00000530490	0.910428	0.000648181	SAMD4B
ENSG00000131386	NONHSAT161350.1	0.910444	0.000647805	GALNT15
ENSG00000137561	NONHSAT032479.2	-0.910471	0.000647119	TTPA
ENSG00000178404	MSTRG.43944.16	0.910476	0.000646996	CEP295NL
ENSG00000109255	ENST00000429962	0.910484	0.000646808	NMU
ENSG00000188483	NONHSAT183181.1	0.910485	0.000646787	IER5L
ENSG00000109674	NONHSAT135407.2	0.910487	0.000646727	NEIL3
ENSG00000167553	NONHSAT182446.1	-0.910489	0.000646686	TUBA1C
ENSG00000117411	NONHSAT156713.1	0.910496	0.000646502	B4GALT2
ENSG00000175352	NONHSAT175141.1	-0.910502	0.000646374	NRIP3
ENSG00000100097	ENST00000623851	-0.910506	0.000646272	LGALS1
ENSG00000123395	NONHSAT023756.2	-0.910507	0.000646233	ATG101
ENSG00000090889	NONHSAT070107.2	0.910522	0.00064587	KIF4A
ENSG00000171241	ENST00000453342	-0.910533	0.000645605	SHCBP1
ENSG00000275074	NONHSAT190944.1	-0.910535	0.000645551	NUDT18
ENSG00000031081	NONHSAT215705.1	0.910536	0.000645536	ARHGAP31
ENSG00000095383	NONHSAT157283.1	0.910561	0.000644917	TBC1D2
ENSG00000005448	ENST00000594576	0.910563	0.000644867	WDR54
ENSG00000162817	ENST00000505133	0.910579	0.00064448	C1orf115
ENSG00000234965	NONHSAT215705.1	-0.910584	0.00064434	SHISA8
ENSG00000135747	ENST00000586657	0.910602	0.00064391	ZNF670-ZNF695
ENSG00000104147	NONHSAT162123.1	-0.910632	0.000643176	OIP5
ENSG00000135631	NONHSAT192574.1	0.910633	0.000643146	RAB11FIP5
ENSG00000165804	NONHSAT042166.2	-0.910647	0.000642809	ZNF219
ENSG00000163507	NONHSAT037545.2	-0.910651	0.000642707	KIAA1524
ENSG00000272414	NONHSAT144554.2	0.910659	0.000642504	FAM47E-STBD1
ENSG00000164109	NONHSAT156901.1	-0.910672	0.000642181	MAD2L1
ENSG00000133597	NONHSAT135407.2	0.910677	0.000642065	ADCK2
ENSG00000166250	NONHSAT162123.1	-0.91068	0.000641978	CLMP
ENSG00000174564	NONHSAT156713.1	-0.910683	0.000641905	IL20RB
ENSG00000023909	NONHSAT182459.1	0.910694	0.000641655	GCLM
ENSG00000160957	NONHSAT200243.1	-0.910696	0.000641587	RECQL4
ENSG00000198727	NONHSAT137546.2	0.910702	0.000641451	MT-CYB
ENSG00000161800	NONHSAT189891.1	-0.910706	0.000641361	RACGAP1
ENSG00000169926	ENST00000623851	-0.910708	0.000641308	KLF13
ENSG00000119333	NONHSAT182446.1	-0.910715	0.000641121	WDR34
ENSG00000144580	ENST00000531702	0.910722	0.000640968	RQCD1
[truncated: 6,305 more rows]
